# Supplementary material for: Metabolomics-based exploration the response mechanisms of Saussurea involucrata leaves under different levels of low temperature stress
Source: PubMed Central journal article supplement (PMC10236807; doi:10.1186/s12864-023-09376-4), 2023-06-01
Supplement: 12864_2023_9376_MOESM1_ESM.pdf [file 12864_2023_9376_MOESM1_ESM.pdf]

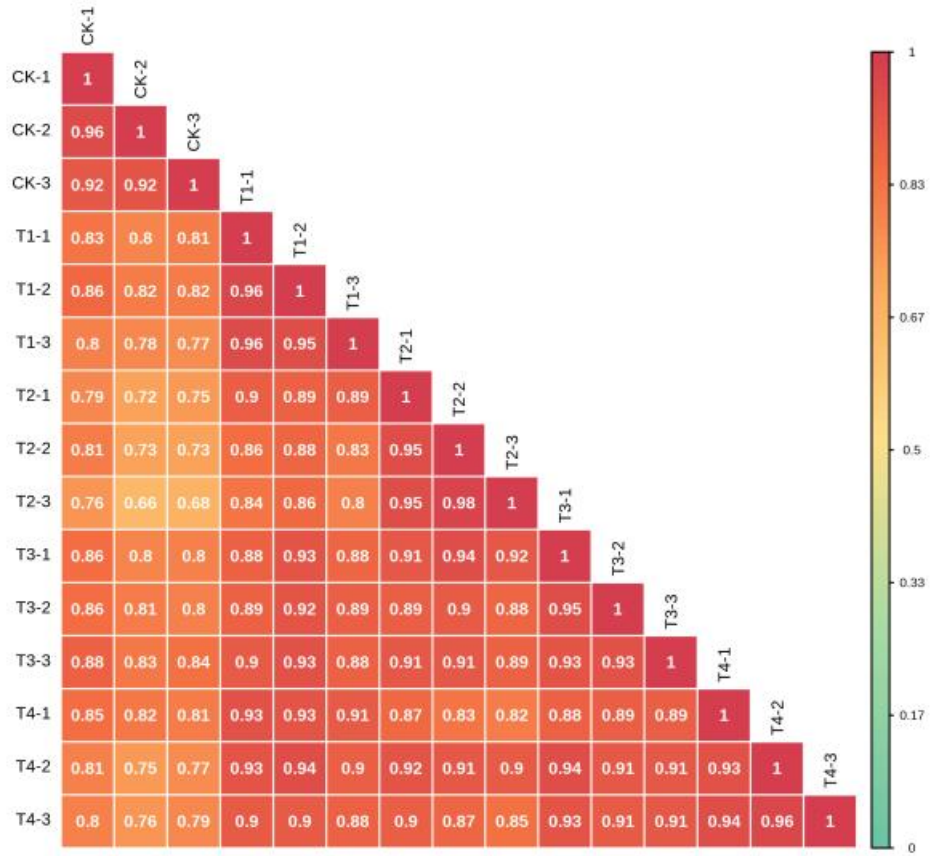

**Figure S1.** Different groups of Pearson's correlation coefficient diagram. Two repeated sample correlations were shown.

# CK vs T1

## KEGG Classification

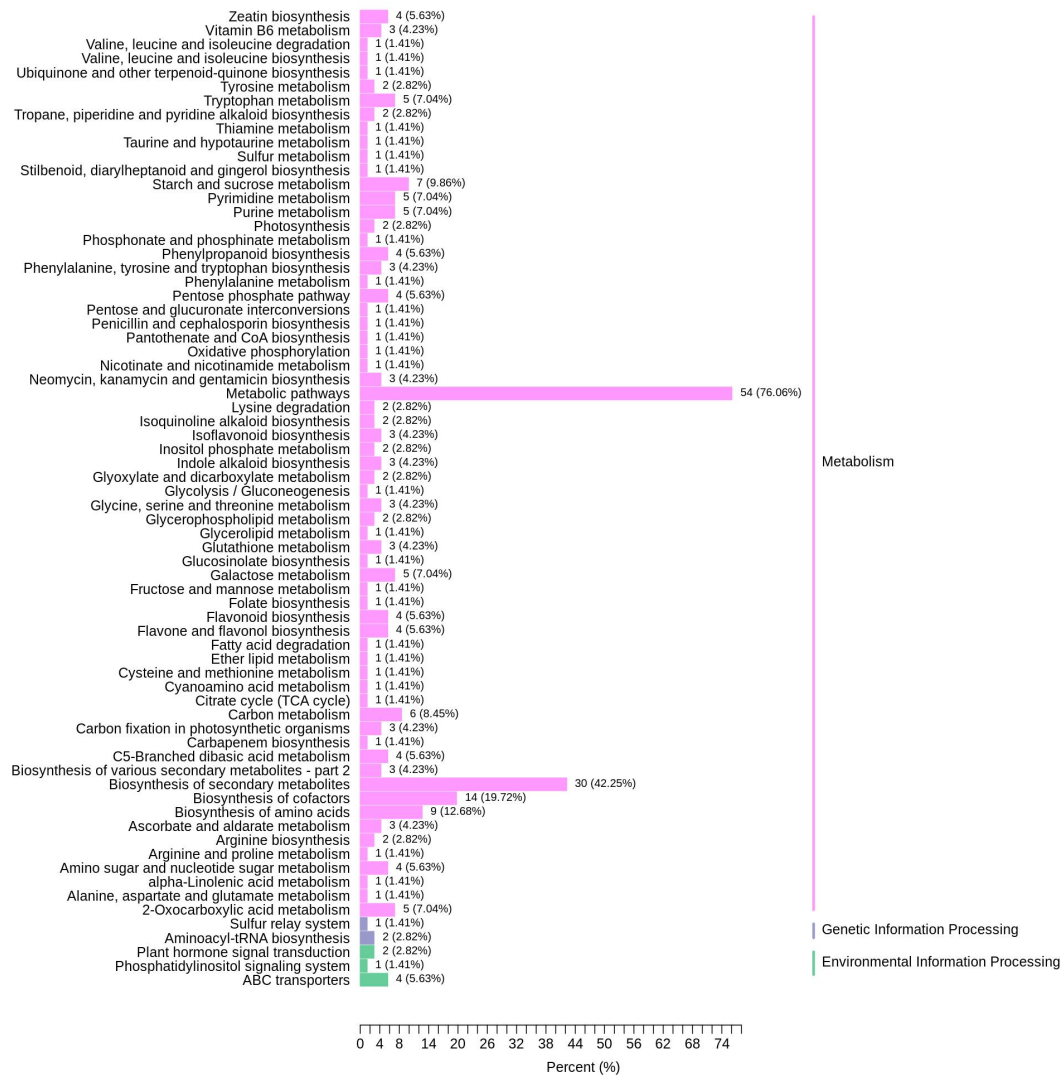

## CK vs T2

### KEGG Classification

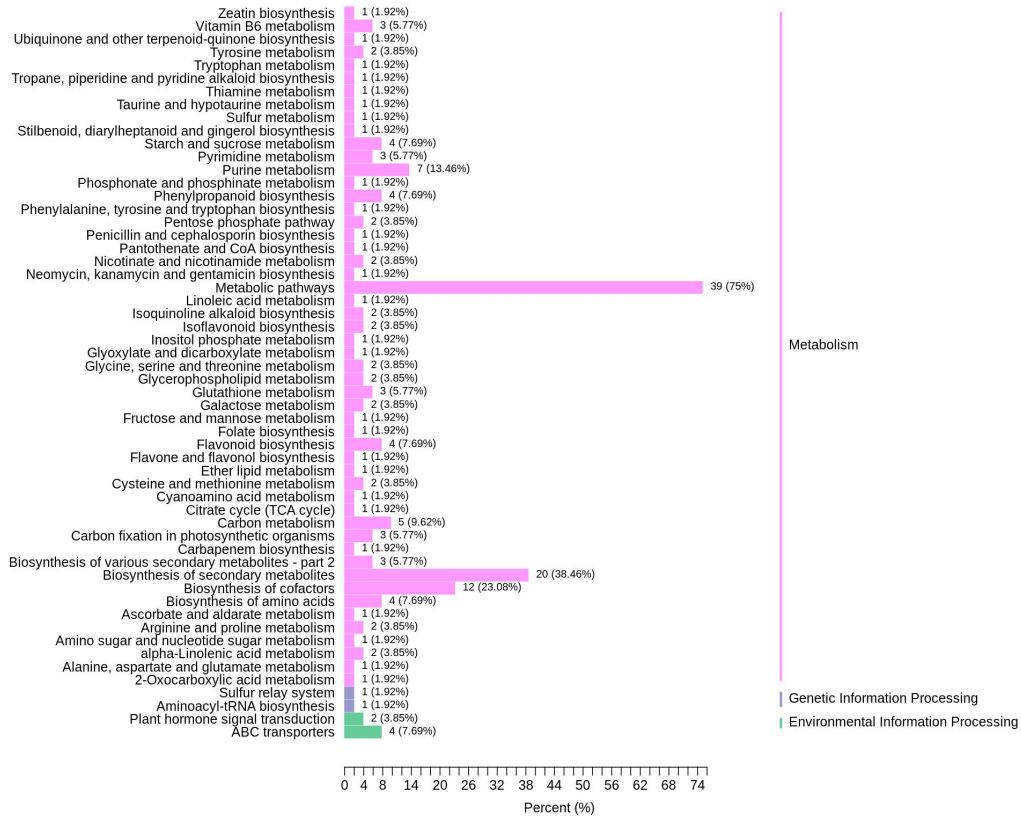

## CK vs T3

### KEGG Classification

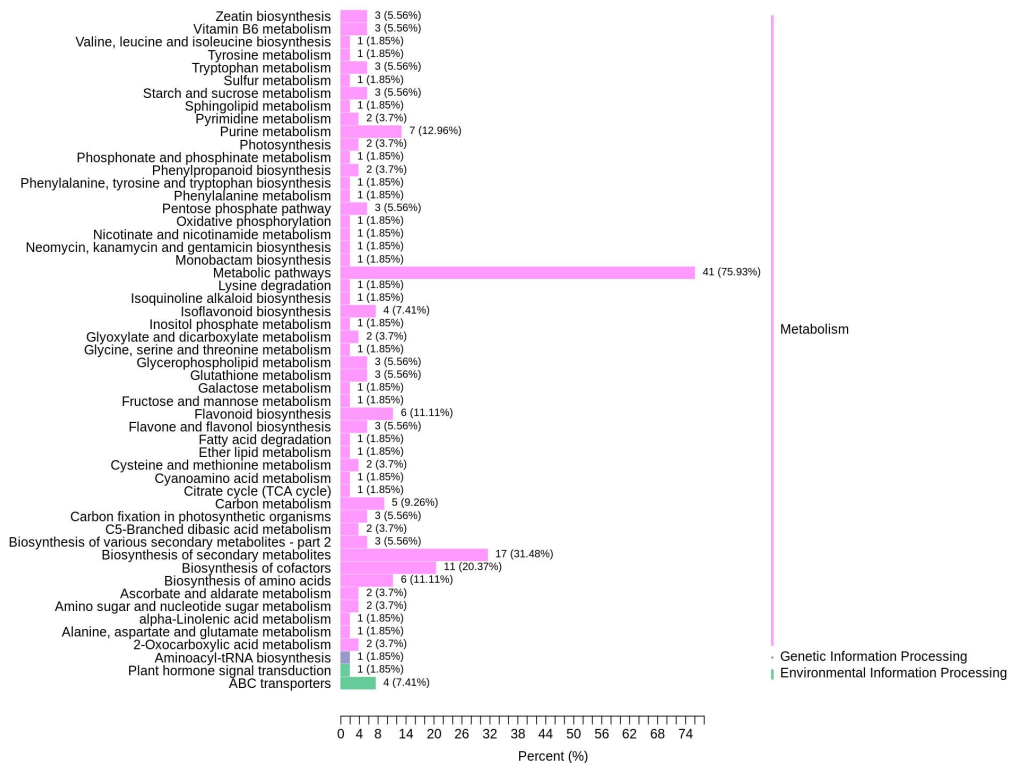

# CK vs T4

## KEGG Classification

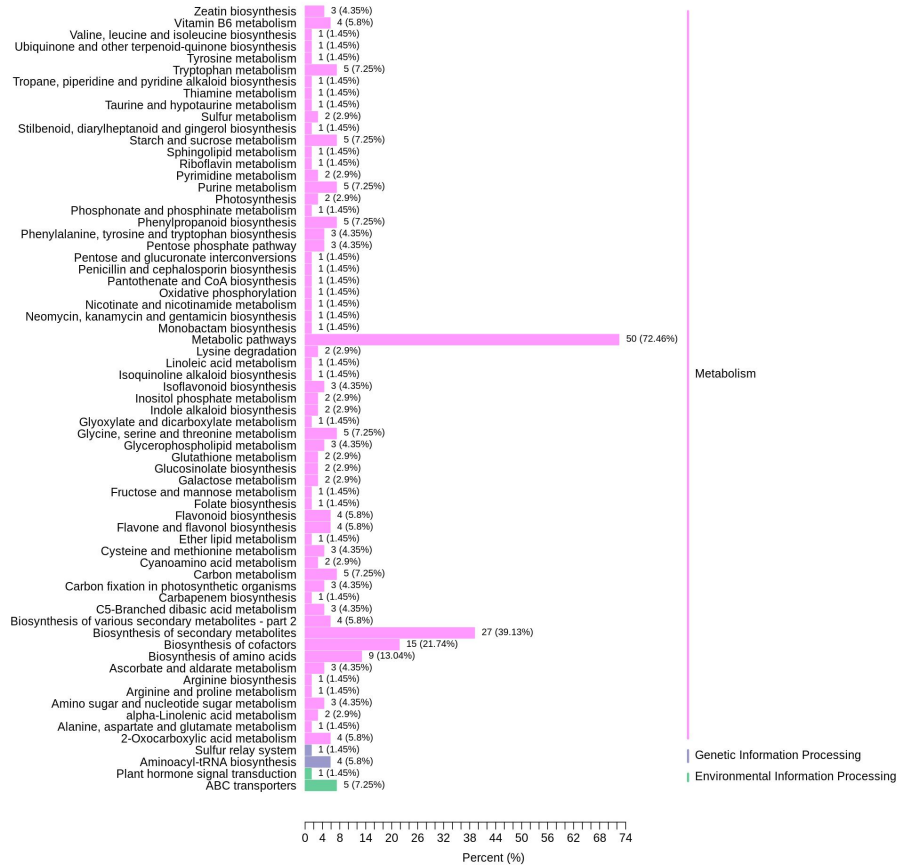

# T1vsT3

## KEGG Classification

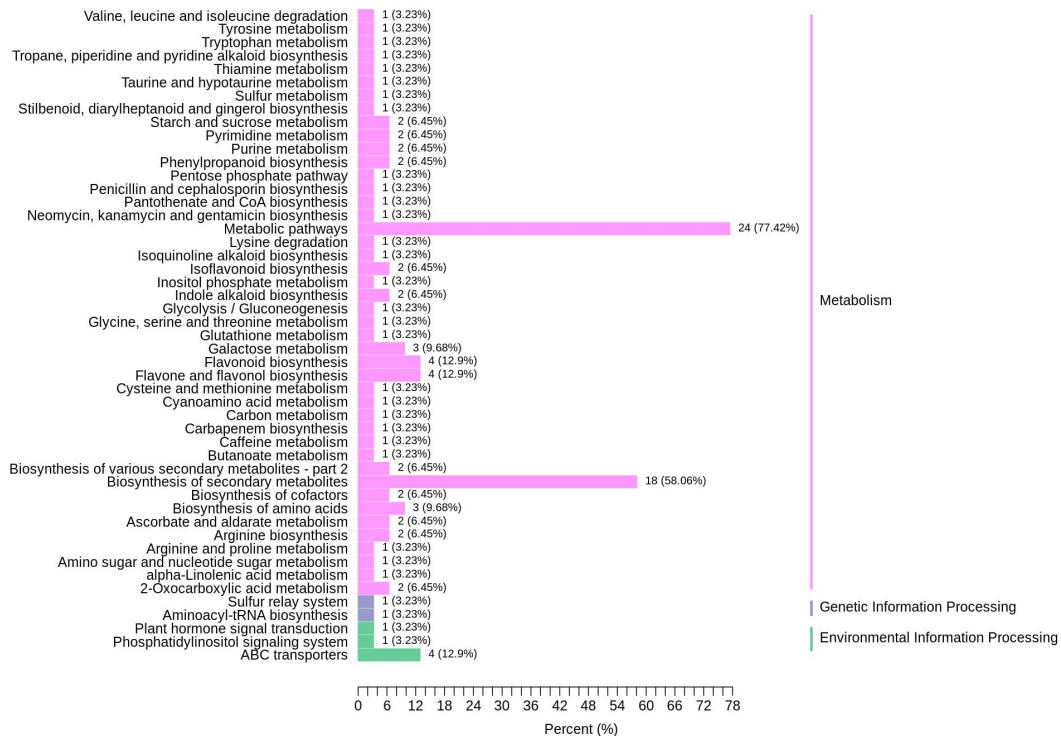

## T2vsT3

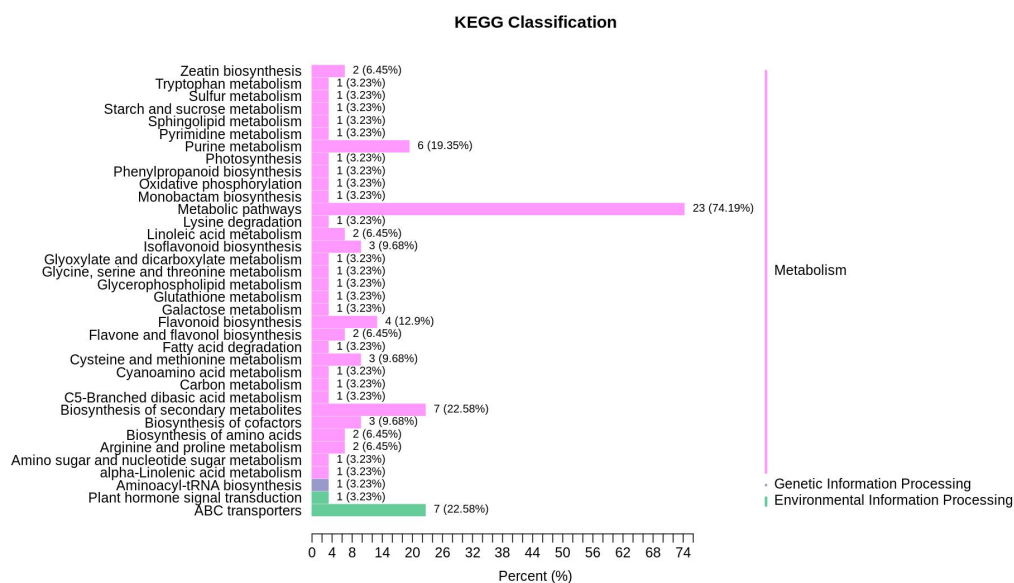

## T2vsT4

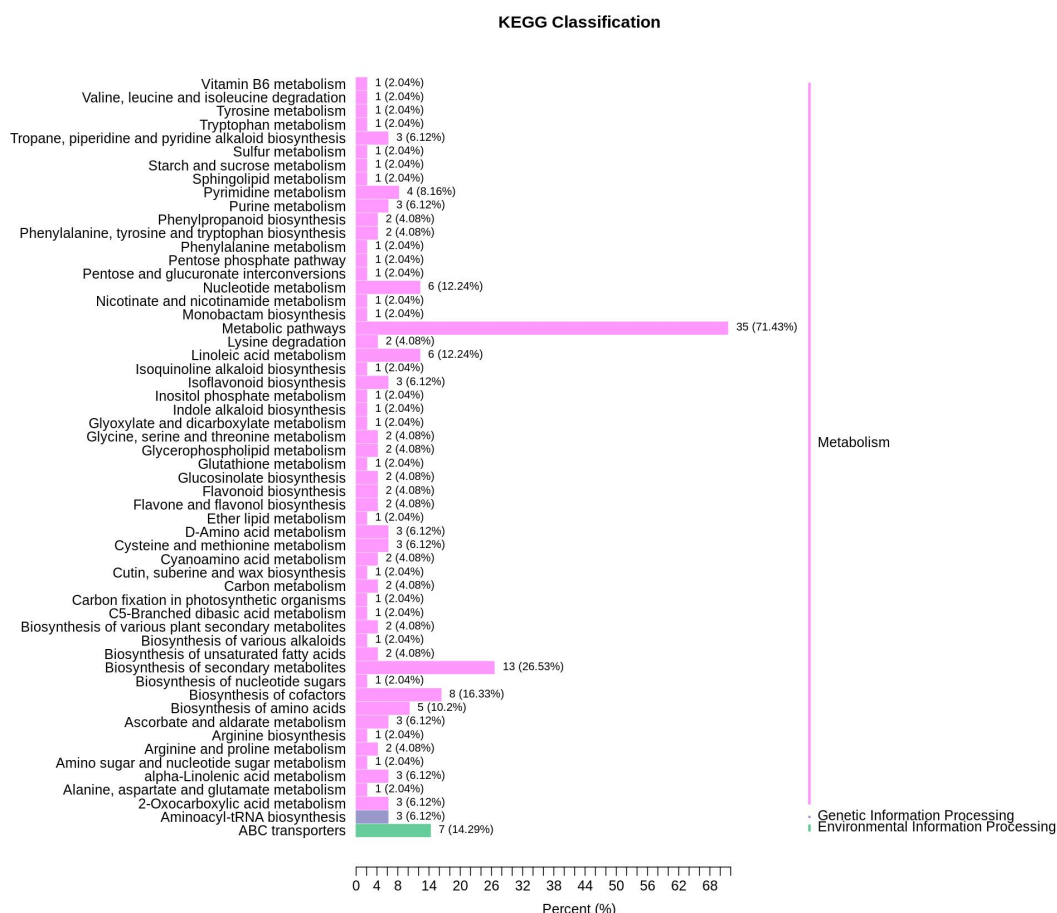

**Figure S2.** KEGG classification map of differential metabolites. CK vs T1; CK vs T2; CK vs T3; CKvsT4; T1vsT3; T2vsT3; T2vsT4. The ordinate is the name of the KEGG metabolic pathway, and the abscess is the number of metabolites annotated to the pathway and their proportion to the total number of annotated metabolites.

## CK vs T1

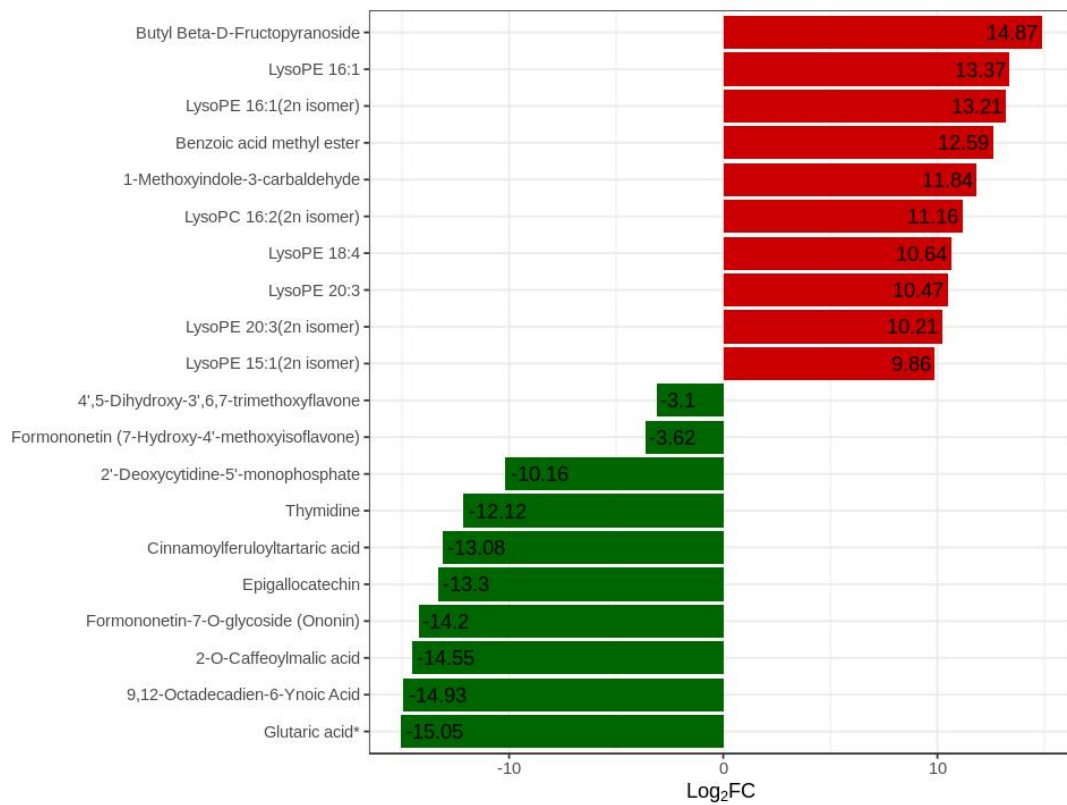

## CK vs T2

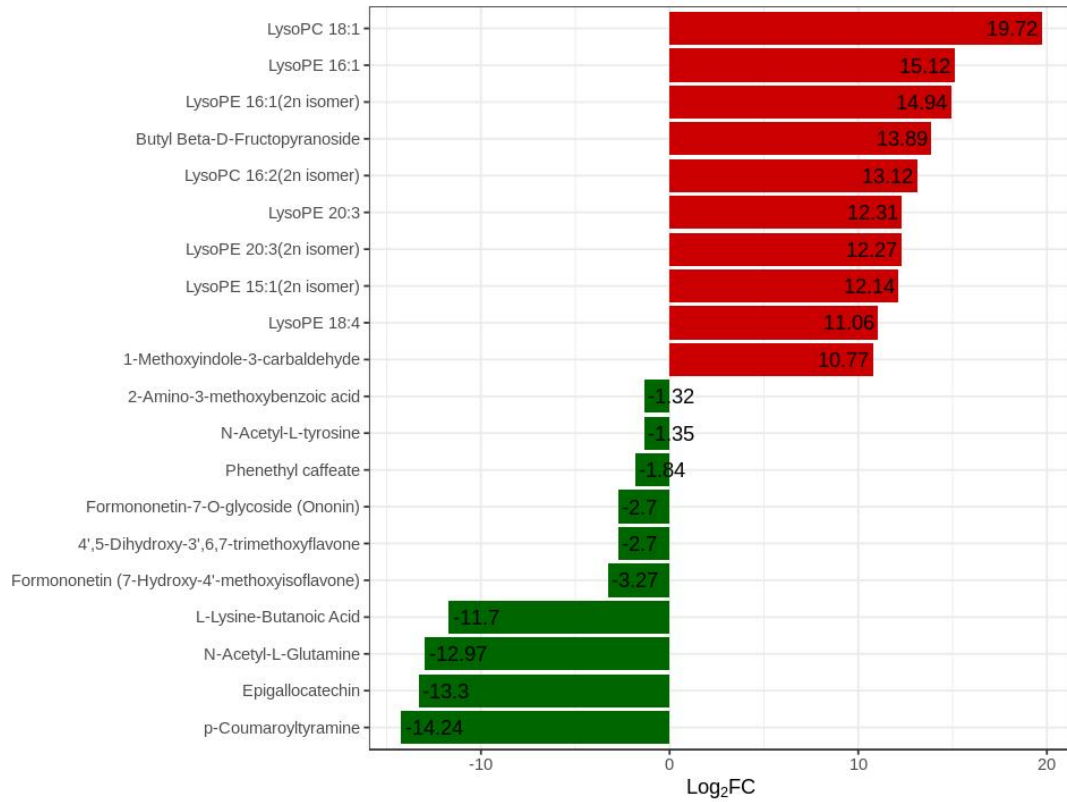

## CK vs T3

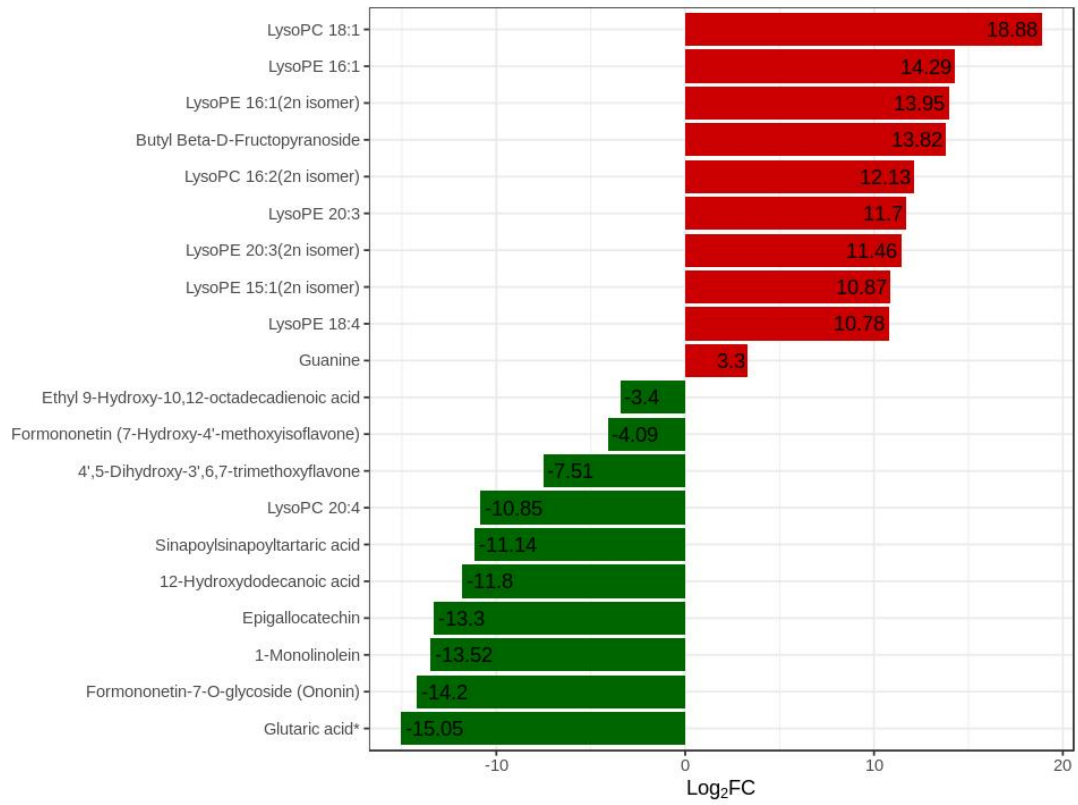

## CK vs T4

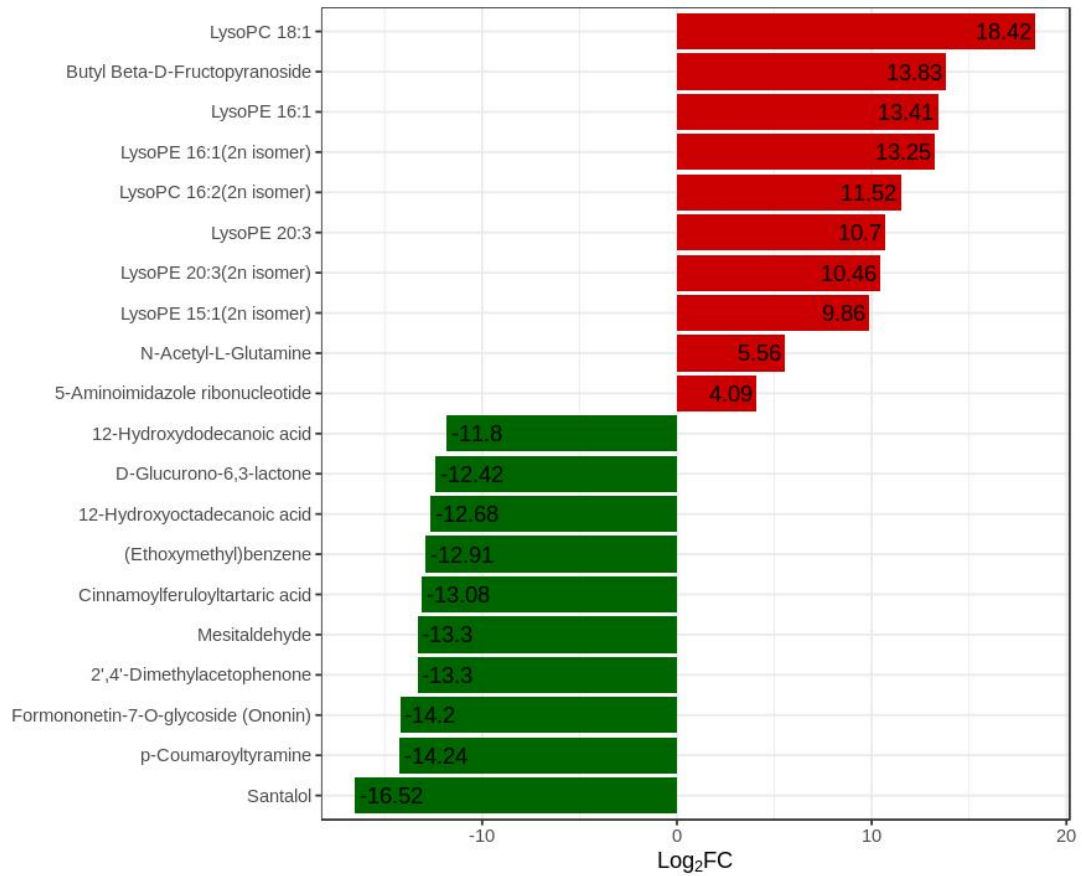

## T1vsT3

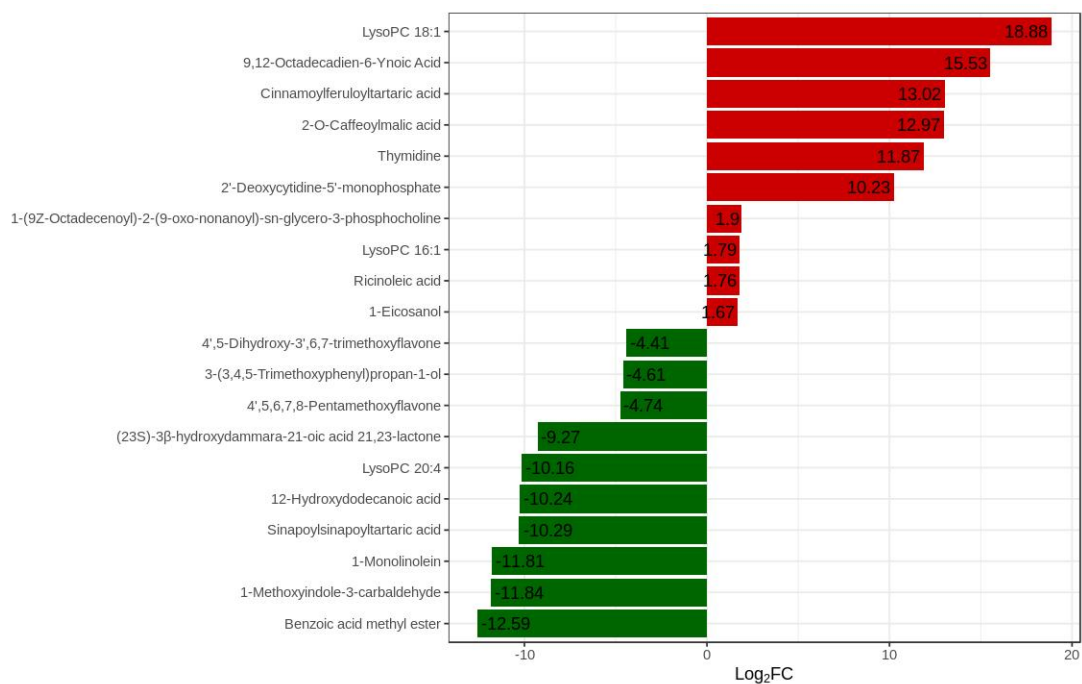

## T2vsT3

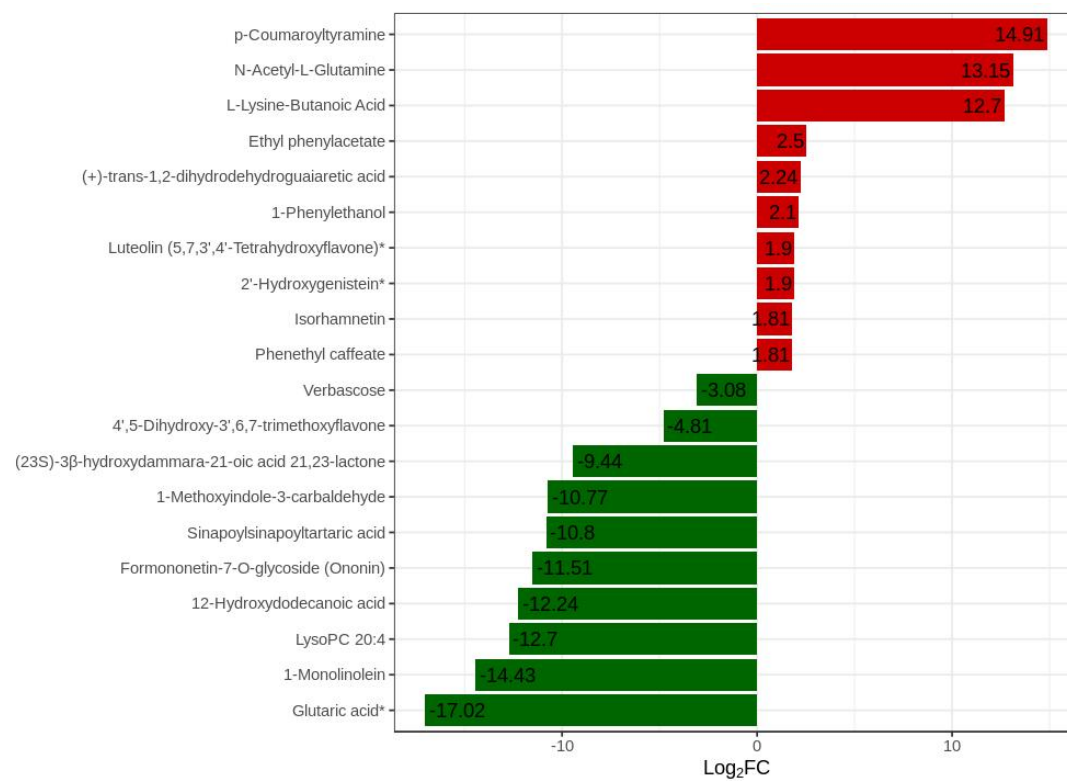



## T2vsT4

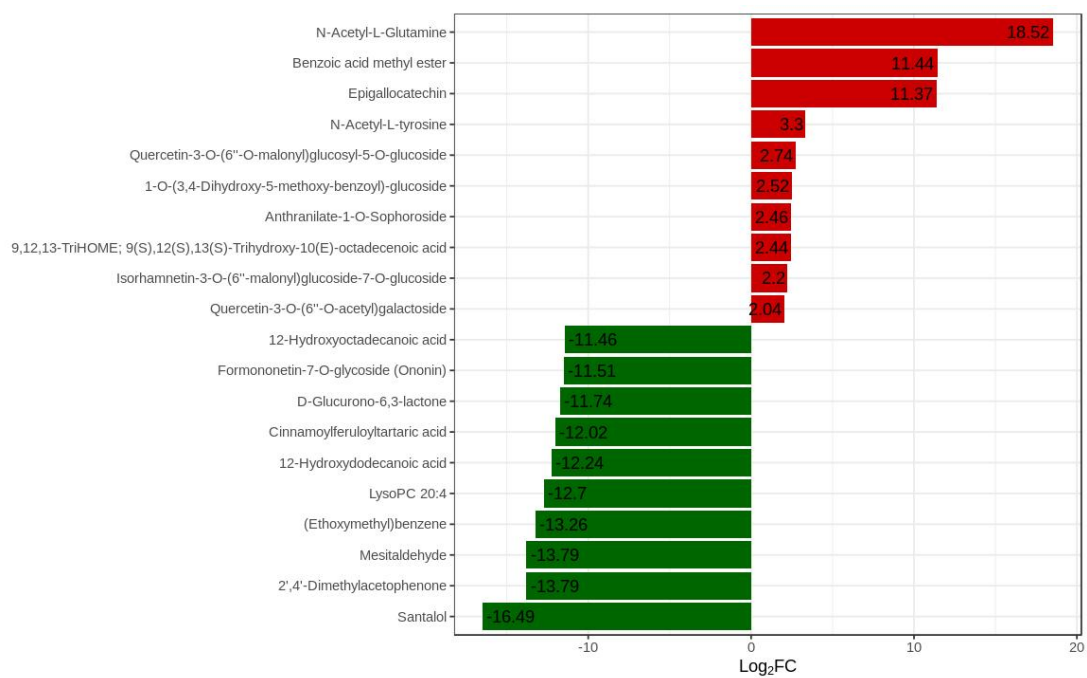

**Figure S3.** Bar chart of differential metabolites. CK vs T1; CK vs T2; CK vs T3; CKvsT4; T1vsT3; T2vsT3; T2vsT4. The top ten up-regulated metabolites and the top ten down-regulated metabolites of each comparison group were screened.

**Table S1.** The classification of compounds detected by the metabolome is in CK , T1, T2, T3 and T4.

| Index      | Q1 (Da) | Q3 (Da) | Molecular Weight (Da) | Formula  | Ionization model | Class                       | Compounds                       |
|------------|---------|---------|-----------------------|----------|------------------|-----------------------------|---------------------------------|
| ML10198895 | 88.04   | 88.04   | 89.05                 | C3H7NO2  | [M-H]-           | Amino acids and derivatives | N-Methylglycine                 |
| pme2601    | 89.00   | 59.00   | 90.03                 | C3H6O3   | [M-H]-           | Organic acids               | 3-Hydroxypropanoic acid         |
| Lmqp000873 | 101.02  | 55.02   | 100.02                | C4H4O3   | [M+H]+           | Organic acids               | Succinic anhydride              |
| pme3017    | 104.07  | 58.00   | 103.06                | C4H9NO2  | [M+H]+           | Organic acids               | 2-Aminoisobutyric acid          |
| pme3033    | 104.07  | 86.00   | 103.06                | C4H9NO2  | [M+H]+           | Amino acids and derivatives | N,N-Dimethylglycine             |
| MWSmce585  | 104.07  | 59.01   | 103.06                | C4H9NO2  | [M+H]+           | Amino acids and derivatives | Methyl 3-aminopropanoate        |
| pmb0484    | 104.10  | 60.10   | 103.09                | C5H13NO  | [M+H]+           | Alkaloids                   | Choline                         |
| ML10172161 | 103.00  | 59.01   | 104.01                | C3H4O4   | [M-H]-           | Organic acids               | Hydroxypyruvic acid             |
| mws0576    | 103.04  | 59.10   | 104.05                | C4H8O3   | [M-H]-           | Organic acids               | 3-Hydroxybutyric acid           |
| pme1975    | 103.00  | 59.00   | 104.06                | C3H4O4   | [M-H]-           | Organic acids               | Malonic acid                    |
| pme0010    | 106.00  | 60.00   | 105.04                | C3H7NO3  | [M+H]+           | Amino acids and derivatives | L-Serine                        |
| HJAP104    | 107.05  | 77.04   | 106.04                | C7H6O    | [M+H]+           | Phenolic acids              | Benzaldehyde                    |
| pme0006    | 116.07  | 70.10   | 115.06                | C5H9NO2  | [M+H]+           | Amino acids and derivatives | L-Proline                       |
| pme3193    | 116.04  | 74.00   | 117.04                | C4H7NO3  | [M-H]-           | Amino acids and derivatives | N-Acetyl-L-glycine              |
| pmb1096    | 118.07  | 91.00   | 117.06                | C8H7N    | [M+H]+           | Alkaloids                   | Indole                          |
| pme0120    | 118.09  | 101.00  | 117.08                | C5H11NO2 | [M+H]+           | Organic acids               | 5-Aminovaleric acid             |
| MWSmce548  | 118.09  | 58.07   | 117.08                | C5H11NO2 | [M+H]+           | Alkaloids                   | Betaine                         |
| mws0192    | 117.02  | 73.00   | 118.03                | C4H6O4   | [M-H]-           | Organic acids               | Succinic acid*                  |
| mws0470    | 117.02  | 73.00   | 118.03                | C4H6O4   | [M-H]-           | Organic acids               | Methylmalonic acid*             |
| mws0147    | 117.06  | 59.00   | 118.06                | C5H10O3  | [M-H]-           | Organic acids               | $\beta$ -Hydroxyisovaleric acid |
| pme3096    | 118.00  | 74.00   | 119.02                | C3H5NO4  | [M-H]-           | Organic acids               | Aminomalonic acid               |
| pmp001287  | 120.08  | 103.05  | 119.07                | C8H9N    | [M+H]+           | Alkaloids                   | N-Benzylmethyle isomethylamine  |

|            |        |        |        |          |        |                             |                                         |
|------------|--------|--------|--------|----------|--------|-----------------------------|-----------------------------------------|
| Lmbp000728 | 121.06 | 77.04  | 120.06 | C8H8O    | [M+H]+ | Others                      | (S)-2-Phenyloxirane                     |
| pme0195    | 120.02 | 62.00  | 121.02 | C3H7NO2S | [M-H]- | Amino acids and derivatives | L-Cysteine                              |
| mws0628    | 121.03 | 92.00  | 122.04 | C7H6O2   | [M-H]- | Phenolic acids              | 4-Hydroxybenzaldehyde                   |
| mws0133    | 123.06 | 80.05  | 122.05 | C6H6N2O  | [M+H]+ | Others                      | Nicotinamide                            |
| MWS2091    | 123.08 | 77.04  | 122.07 | C8H10O   | [M+H]+ | Phenolic acids              | 1-Phenylethanol                         |
| pme0490    | 124.04 | 78.00  | 123.03 | C6H5NO2  | [M+H]+ | Others                      | Nicotinic acid (Vitamin B3)             |
| Lmbp000668 | 124.04 | 78.03  | 123.03 | C6H5NO2  | [M+H]+ | Others                      | Isonicotinic acid                       |
| mws0572    | 126.07 | 109.00 | 125.06 | C5H7N3O  | [M+H]+ | Nucleotides and derivatives | 5-Methylcytosine                        |
| mws0982    | 126.10 | 68.00  | 125.10 | C6H11N3  | [M+H]+ | Alkaloids                   | 1-Methylhistamine                       |
| MWS0813    | 128.04 | 82.03  | 129.04 | C5H7NO3  | [M-H]- | Amino acids and derivatives | 5-Oxoproline                            |
| Lmbn000612 | 128.04 | 82.03  | 129.04 | C5H7NO3  | [M-H]- | Organic acids               | 1-Pyrroline-4-hydroxy-2-carboxylic acid |
| MWSmce709  | 130.06 | 103.05 | 129.06 | C9H7N    | [M+H]+ | Alkaloids                   | Isoquinoline                            |
| MWS0811    | 130.09 | 84.08  | 129.08 | C6H11NO2 | [M+H]+ | Organic acids               | L-Pipecolic Acid                        |
| pme2693    | 131.12 | 114.09 | 130.11 | C6H14N2O | [M+H]+ | Alkaloids                   | N-Acetylputrescine                      |
| Zmpn000638 | 130.05 | 88.04  | 131.07 | C4H9N3O2 | [M-H]- | Organic acids               | 3-Guanidinopropionic acid               |
| mws0258    | 132.10 | 86.00  | 131.10 | C6H13NO2 | [M+H]+ | Amino acids and derivatives | L-Isoleucine*                           |
| pme0274    | 132.10 | 69.00  | 131.10 | C6H13NO2 | [M+H]+ | Organic acids               | 6-Aminocaproic acid                     |
| mws0227    | 132.10 | 86.20  | 131.10 | C6H13NO2 | [M+H]+ | Amino acids and derivatives | L-Leucine*                              |
| mws1587    | 132.10 | 86.00  | 131.10 | C6H13NO2 | [M+H]+ | Amino acids and derivatives | L-Norleucine*                           |
| mws1167    | 131.00 | 59.20  | 132.01 | C4H4O5   | [M-H]- | Organic acids               | Oxaloacetic acid                        |
| mws0473    | 131.03 | 87.05  | 132.04 | C5H8O4   | [M-H]- | Organic acids               | 2-Methylsuccinic acid*                  |
| Lmmn000806 | 131.03 | 87.05  | 132.04 | C5H8O4   | [M-H]- | Organic acids               | Dimethylmalonic acid*                   |
| pme0243    | 131.03 | 87.05  | 132.04 | C5H8O4   | [M-H]- | Organic acids               | Glutaric acid*                          |
| Lmgn000160 | 131.05 | 70.03  | 132.05 | C4H8N2O3 | [M-H]- | Organic acids               | 3-Ureidopropionic Acid                  |
| mws0001    | 133.06 | 74.00  | 132.05 | C4H8N2O3 | [M+H]+ | Amino acids and derivatives | L-Asparagine                            |
| pme0682    | 133.10 | 105.10 | 132.07 | C8H8N2   | [M+H]+ | Alkaloids                   | 4-Aminoindole                           |

|            |        |        |        |           |        |                             |                                                |
|------------|--------|--------|--------|-----------|--------|-----------------------------|------------------------------------------------|
| Lmrn002746 | 131.07 | 85.07  | 132.08 | C6H12O3   | [M-H]- | Organic acids               | 2-Hydroxy-4-methylpentanoic acid               |
| pme2527    | 133.00 | 116.00 | 132.09 | C5H12N2O2 | [M+H]+ | Amino acids and derivatives | L-Ornithine                                    |
| mws0219    | 132.03 | 88.00  | 133.04 | C4H7NO4   | [M-H]- | Amino acids and derivatives | L-Aspartic Acid*                               |
| MWS1882    | 132.03 | 88.04  | 133.04 | C4H7NO4   | [M-H]- | Organic acids               | Iminodiacetic acid*                            |
| Lmbn000198 | 133.01 | 71.01  | 134.02 | C4H6O5    | [M-H]- | Others                      | 3-Dehydro-L-Threonic Acid*                     |
| MWS1709    | 133.01 | 71.01  | 134.02 | C4H6O5    | [M-H]- | Organic acids               | D-Malic acid*                                  |
| Zmdp000972 | 136.04 | 91.05  | 135.04 | C4H9NO2S  | [M+H]+ | Amino acids and derivatives | S-Methyl-L-cysteine                            |
| Lmgp000659 | 136.08 | 91.05  | 135.07 | C8H9NO    | [M+H]+ | Alkaloids                   | 2-Phenylacetamide*                             |
| HJKP000649 | 136.07 | 91.05  | 135.07 | C8H9NO    | [M+H]+ | Alkaloids                   | N-benzylformamide*                             |
| mws0889    | 135.03 | 75.01  | 136.04 | C4H8O5    | [M-H]- | Others                      | D-Threonic Acid                                |
| pme0033    | 137.05 | 119.00 | 136.04 | C5H4N4O   | [M+H]+ | Nucleotides and derivatives | Hypoxanthine                                   |
| MWSmce466  | 135.05 | 92.03  | 136.05 | C8H8O2    | [M-H]- | Phenolic acids              | 4-Hydroxyacetophenone*                         |
| pme1724    | 137.06 | 91.00  | 136.05 | C8H8O2    | [M+H]+ | Phenolic acids              | Benzoic acid methyl ester                      |
| MWS1848    | 135.05 | 92.03  | 136.05 | C8H8O2    | [M-H]- | Phenolic acids              | Phenyl acetate*                                |
| MWSmce699  | 137.10 | 91.05  | 136.09 | C9H12O    | [M+H]+ | Others                      | (Ethoxymethyl)benzene                          |
| mws0146    | 138.06 | 78.00  | 137.05 | C7H7NO2   | [M+H]+ | Alkaloids                   | Nicotinic Acid Methyl Ester(Methyl Nicotinate) |
| pme1002    | 138.09 | 103.00 | 137.08 | C8H11NO   | [M+H]+ | Alkaloids                   | L-Tyramine                                     |
| mws0749    | 137.02 | 93.00  | 138.03 | C7H6O3    | [M-H]- | Phenolic acids              | 4-Hydroxybenzoic acid*                         |
| Hmgm001653 | 137.02 | 93.04  | 138.03 | C7H6O3    | [M-H]- | Phenolic acids              | Protocatechualdehyde*                          |
| Lmgm001670 | 137.03 | 108.02 | 138.03 | C7H6O3    | [M-H]- | Phenolic acids              | Salicylic acid                                 |
| mws2368    | 137.06 | 119.05 | 138.07 | C8H10O2   | [M-H]- | Phenolic acids              | Tyrosol; 4-Hydroxyphenylethanol                |
| pme2828    | 140.00 | 99.00  | 139.03 | C6H5NO3   | [M+H]+ | Phenolic acids              | 4-Nitrophenol                                  |
| pma2987    | 142.10 | 124.09 | 141.09 | C6H11N3O  | [M+H]+ | Alkaloids                   | Histidinol                                     |
| pme2879    | 141.00 | 123.00 | 142.04 | C5H6N2O3  | [M-H]- | Nucleotides and derivatives | 5-Hydroxymethyluracil                          |
| Lmcp007199 | 143.09 | 128.06 | 142.08 | C11H10    | [M+H]+ | Others                      | 2-Methylnaphthalene                            |
| pmp000966  | 144.10 | 84.10  | 143.10 | C7H13NO2  | [M+H]+ | Alkaloids                   | Stachydrine                                    |

|            |        |        |        |           |        |                             |                                  |
|------------|--------|--------|--------|-----------|--------|-----------------------------|----------------------------------|
| Rfmb318    | 144.10 | 84.08  | 144.09 | C7H14NO2+ | [M]+   | Amino acids and derivatives | D-Proline betaine                |
| Lmyn008503 | 143.11 | 143.11 | 144.12 | C8H16O2   | [M-H]- | Lipids                      | Octanoic acid                    |
| mws0851    | 143.11 | 143.11 | 144.12 | C8H16O2   | [M-H]- | Organic acids               | Valproic Acid                    |
| Qmkp093004 | 146.06 | 91.05  | 145.05 | C9H7NO    | [M+H]+ | Alkaloids                   | Indole-3-carboxaldehyde          |
| mws0567    | 146.09 | 87.00  | 145.09 | C5H11N3O2 | [M+H]+ | Organic acids               | 4-Guanidinobutyric acid          |
| HX1365     | 147.04 | 91.05  | 146.04 | C9H6O2    | [M+H]+ | Lignans and Coumarins       | Coumarin                         |
| Wmzn000227 | 145.06 | 109.04 | 146.06 | C6H10O4   | [M-H]- | Organic acids               | 2,2-Dimethylsuccinic acid        |
| pme0193    | 147.08 | 84.00  | 146.07 | C5H10N2O3 | [M+H]+ | Amino acids and derivatives | L-Glutamine                      |
| pme0026    | 147.11 | 84.00  | 146.11 | C6H14N2O2 | [M+H]+ | Amino acids and derivatives | L-Lysine                         |
| Zmzn000113 | 146.05 | 102.06 | 147.05 | C5H9NO4   | [M-H]- | Amino acids and derivatives | L-threo-3-Methylaspartate        |
| pmp001285  | 149.02 | 65.04  | 148.02 | C8H4O3    | [M+H]+ | Phenolic acids              | Phthalic anhydride               |
| Lmbn000216 | 147.03 | 57.03  | 148.04 | C5H8O5    | [M-H]- | Organic acids               | 3-Methylmalic acid*              |
| Zmyn000247 | 147.03 | 57.03  | 148.04 | C5H8O5    | [M-H]- | Organic acids               | 2-Hydroxyglutaric Acid*          |
| Zmyn000230 | 147.03 | 57.03  | 148.04 | C5H8O5    | [M-H]- | Others                      | 2-Dehydro-3-deoxy-L-arabinonate* |
| pmb2826    | 147.03 | 87.10  | 148.04 | C5H8O5    | [M-H]- | Organic acids               | L-Citramalic acid                |
| MWS20194   | 149.06 | 103.06 | 148.05 | C9H8O2    | [M+H]+ | Phenolic acids              | Cinnamic acid                    |
| MWSmce698  | 149.10 | 65.04  | 148.09 | C10H12O   | [M+H]+ | Others                      | 2',4'-Dimethylacetophenone       |
| MWSmce463  | 149.10 | 65.04  | 148.09 | C10H12O   | [M+H]+ | Others                      | Mesitaldehyde                    |
| Lmgp000796 | 150.06 | 61.01  | 149.05 | C8H7NO2   | [M+H]+ | Alkaloids                   | 4-Hydroxymandelonitrile          |
| pme1210    | 150.06 | 61.00  | 149.05 | C5H11NO2S | [M+H]+ | Amino acids and derivatives | L-Methionine                     |
| mws1499    | 149.05 | 59.01  | 150.05 | C5H10O5   | [M-H]- | Others                      | D-Arabinose                      |
| Zmgn000173 | 149.05 | 75.01  | 150.05 | C5H10O5   | [M-H]- | Others                      | D-Ribose                         |
| pme1109    | 152.06 | 135.00 | 151.05 | C5H5N5O   | [M+H]+ | Nucleotides and derivatives | Guanine                          |
| pme0256    | 151.03 | 151.00 | 152.03 | C5H4N4O2  | [M-H]- | Nucleotides and derivatives | Xanthine                         |
| mws0458    | 151.04 | 136.00 | 152.05 | C8H8O3    | [M-H]- | Phenolic acids              | Vanillin                         |
| Zmyn002323 | 151.04 | 107.05 | 152.05 | C8H8O3    | [M-H]- | Organic acids               | 2-Hydroxyphenylacetic acid       |

|            |        |        |        |           |        |                             |                                                  |
|------------|--------|--------|--------|-----------|--------|-----------------------------|--------------------------------------------------|
| mws0213    | 151.06 | 71.00  | 152.07 | C5H12O5   | [M-H]- | Others                      | Ribitol*                                         |
| pme0513    | 151.06 | 59.00  | 152.07 | C5H12O5   | [M-H]- | Others                      | Xylitol                                          |
| mws0437    | 151.06 | 71.00  | 152.07 | C5H12O5   | [M-H]- | Others                      | D-Arabitol*                                      |
| mws0444    | 152.04 | 108.00 | 153.04 | C7H7NO3   | [M-H]- | Phenolic acids              | 3-Aminosalicylic acid                            |
| mws0183    | 153.02 | 109.03 | 154.03 | C7H6O4    | [M-H]- | Phenolic acids              | 3,4-Dihydroxybenzoic acid (Protocatechuic acid)* |
| mws0180    | 153.02 | 109.03 | 154.03 | C7H6O4    | [M-H]- | Phenolic acids              | 2,5-Dihydroxybenzoic acid; Gentisic Acid*        |
| mws0254    | 156.08 | 110.00 | 155.07 | C6H9N3O2  | [M+H]+ | Amino acids and derivatives | L-Histidine                                      |
| pmb0819    | 157.00 | 130.00 | 156.07 | C10H8N2   | [M+H]+ | Alkaloids                   | 3-Indoleacetonitrile                             |
| Lmbn001467 | 158.08 | 116.07 | 159.09 | C7H13NO3  | [M-H]- | Organic acids               | 5-Acetamidopentanoic Acid                        |
| Lmbn002072 | 159.07 | 97.07  | 160.07 | C7H12O4   | [M-H]- | Organic acids               | 2-Propylsuccinic acid                            |
| mws0005    | 161.11 | 144.00 | 160.10 | C10H12N2  | [M+H]+ | Alkaloids                   | Tryptamine                                       |
| mws1417    | 160.04 | 116.00 | 161.05 | C9H7NO2   | [M-H]- | Alkaloids                   | Indole-3-carboxylic acid                         |
| Lmgp001898 | 162.06 | 116.05 | 161.05 | C9H7NO2   | [M+H]+ | Alkaloids                   | 4,6-Dihydroxyquinoline                           |
| pme3382    | 160.06 | 98.00  | 161.07 | C6H11NO4  | [M-H]- | Amino acids and derivatives | N-Acetyl-L-threonine                             |
| Hmqn002118 | 161.02 | 133.03 | 162.03 | C9H6O3    | [M-H]- | Lignans and Coumarins       | Umbelliferone                                    |
| pme2914    | 161.05 | 99.00  | 162.05 | C6H10O5   | [M-H]- | Amino acids and derivatives | 3-Hydroxy-3-methylpentane-1,5-dioic acid         |
| pmf0440    | 163.08 | 91.10  | 162.07 | C10H10O2  | [M+H]+ | Phenolic acids              | 4-Methoxycinnamaldehyde                          |
| pme2758    | 162.04 | 144.00 | 163.05 | C5H9NO5   | [M-H]- | Amino acids and derivatives | 4-Hydroxy-L-glutamic acid                        |
| pme1419    | 164.07 | 104.00 | 163.07 | C6H13NO2S | [M+H]+ | Amino acids and derivatives | L-Methionine methyl ester                        |
| mws0159    | 163.04 | 91.00  | 164.05 | C9H8O3    | [M-H]- | Organic acids               | Phenylpyruvic acid                               |
| pmb0142    | 165.10 | 95.20  | 164.05 | C9H8O3    | [M+H]+ | Phenolic acids              | Caffeic aldehyde                                 |
| MWSmce712  | 165.09 | 91.05  | 164.08 | C10H12O2  | [M+H]+ | Phenolic acids              | Ethyl phenylacetate                              |
| Lmmn004032 | 163.11 | 148.06 | 164.12 | C11H16O   | [M-H]- | Others                      | Cis-Jasmone                                      |
| pme3083    | 164.04 | 120.00 | 165.04 | C8H7NO3   | [M-H]- | Phenolic acids              | 2-(Formylamino)benzoic acid                      |
| pme2617    | 166.05 | 102.00 | 165.05 | C5H11NO3S | [M+H]+ | Amino acids and derivatives | L-Methionine Sulfoxide                           |
| pme0021    | 166.09 | 120.08 | 165.07 | C9H11NO2  | [M+H]+ | Amino acids and derivatives | L-Phenylalanine                                  |

|            |        |        |        |           |        |                             |                                  |
|------------|--------|--------|--------|-----------|--------|-----------------------------|----------------------------------|
| pme0282    | 165.02 | 77.04  | 166.03 | C8H6O4    | [M-H]- | Phenolic acids              | Phthalic acid                    |
| pme0274    | 167.10 | 121.10 | 166.03 | C6H6N4S   | [M+H]+ | Nucleotides and derivatives | 6-Methylmercaptapurine           |
| mws0344    | 165.04 | 75.00  | 166.05 | C5H10O6   | [M-H]- | Others                      | D-Xyloic acid                    |
| Lmrn003000 | 165.06 | 103.06 | 166.06 | C9H10O3   | [M-H]- | Phenolic acids              | 2-Hydroxy-3-phenylpropanoic acid |
| Lmbn005172 | 165.06 | 119.05 | 166.06 | C9H10O3   | [M-H]- | Phenolic acids              | 2,6-Dimethoxybenzaldehyde*       |
| MWS0274    | 165.06 | 119.05 | 166.06 | C9H10O3   | [M-H]- | Organic acids               | DL-3-Phenyllactic acid*          |
| MWSmce165  | 165.08 | 59.02  | 166.08 | C6H14O5   | [M-H]- | Others                      | L-Fucitol                        |
| pma2400    | 167.10 | 94.99  | 166.14 | C11H18O   | [M+H]+ | Organic acids               | Dihydrojasmane                   |
| NK10253223 | 168.06 | 94.06  | 167.06 | C8H9NO3   | [M+H]+ | Phenolic acids              | 2-Amino-3-methoxybenzoic acid    |
| Zmjp000624 | 168.06 | 150.05 | 167.06 | C8H9NO3   | [M+H]+ | Others                      | Pyridoxal                        |
| Zmsp001834 | 169.05 | 65.00  | 168.04 | C8H8O4    | [M+H]+ | Quinones                    | 2,6-Dimethoxy-1,4-benzoquinone   |
| MWSmce501  | 167.04 | 108.02 | 168.04 | C8H8O4    | [M-H]- | Phenolic acids              | Protocatechuic Acid Methyl Ester |
| pme1292    | 167.10 | 123.04 | 168.04 | C8H8O4    | [M-H]- | Phenolic acids              | Homogentisic acid                |
| pme1383    | 170.08 | 134.10 | 169.07 | C8H11NO3  | [M+H]+ | Others                      | Pyridoxine                       |
| ML10176345 | 171.03 | 109.03 | 172.04 | C7H8O5    | [M-H]- | Organic acids               | 3-Dehydroshikimic acid           |
| pme0253    | 174.11 | 86.00  | 173.11 | C8H15NO3  | [M+H]+ | Amino acids and derivatives | N-Acetyl-L-leucine               |
| pme3009    | 175.02 | 99.00  | 174.02 | C6H6O6    | [M+H]+ | Organic acids               | Trans-Citridic acid              |
| MA10039492 | 173.01 | 71.03  | 174.02 | C6H6O6    | [M-H]- | Others                      | Dehydroascorbic acid             |
| mws0154    | 173.05 | 93.00  | 174.05 | C7H10O5   | [M-H]- | Organic acids               | Shikimic acid                    |
| mws0242    | 173.08 | 111.00 | 174.09 | C8H14O4   | [M-H]- | Organic acids               | Suberic Acid                     |
| Zmyn000155 | 173.11 | 131.08 | 174.10 | C7H14N2O3 | [M-H]- | Amino acids and derivatives | N- $\alpha$ -Acetyl-L-ornithine  |
| pme2559    | 174.04 | 88.00  | 175.05 | C6H9NO5   | [M-H]- | Amino acids and derivatives | N-Acetyl-L-Aspartic Acid         |
| pmb0813    | 176.10 | 133.20 | 175.06 | C10H9NO2  | [M+H]+ | Alkaloids                   | 1-Methoxyindole-3-carbaldehyde   |
| mws4175    | 175.02 | 85.03  | 176.03 | C6H8O6    | [M-H]- | Others                      | D-Glucurono-6,3-lactone          |
| mws1075    | 177.05 | 121.00 | 176.05 | C10H8O3   | [M+H]+ | Lignans and Coumarins       | 7-Methoxycoumarin                |
| Zmgn001448 | 175.06 | 115.04 | 176.07 | C7H12O5   | [M-H]- | Organic acids               | 2-Propylmalic Acid               |

|            |        |        |        |            |        |                             |                                                  |
|------------|--------|--------|--------|------------|--------|-----------------------------|--------------------------------------------------|
| mws1500    | 177.09 | 130.90 | 176.08 | C11H12O2   | [M+H]+ | Phenolic acids              | Ethyl cinnamate                                  |
| mws1013    | 177.02 | 133.20 | 178.03 | C9H6O4     | [M-H]- | Lignans and Coumarins       | Esculetin                                        |
| MWSmce220  | 177.04 | 59.02  | 178.05 | C6H10O6    | [M-H]- | Organic acids               | D-Glucono-1,5-lactone                            |
| pmb2795    | 177.00 | 145.00 | 178.06 | C10H10O3   | [M-H]- | Phenolic acids              | 4-Methoxycinnamic acid                           |
| mws0981    | 178.04 | 136.02 | 179.04 | C6H5N5O2   | [M-H]- | Nucleotides and derivatives | Isoxanthopterin                                  |
| pmb0786    | 180.09 | 163.06 | 179.08 | C6H13NO5   | [M+H]+ | Others                      | D-Glucosamine                                    |
| mws2212    | 179.03 | 135.05 | 180.04 | C9H8O4     | [M-H]- | Phenolic acids              | Caffeic acid                                     |
| mws1164    | 179.06 | 59.01  | 180.06 | C6H12O6    | [M-H]- | Others                      | D-Fructose*                                      |
| mws4170    | 179.06 | 59.01  | 180.06 | C6H12O6    | [M-H]- | Others                      | D-Glucose*                                       |
| Hmln000297 | 179.05 | 59.01  | 180.06 | C6H12O6    | [M-H]- | Others                      | Inositol*                                        |
| mws0093    | 179.07 | 146.00 | 180.08 | C10H12O3   | [M-H]- | Phenolic acids              | Coniferyl alcohol                                |
| MWS2070    | 179.07 | 92.03  | 180.08 | C10H12O3   | [M-H]- | Phenolic acids              | Propyl 4-hydroxybenzoate                         |
| mws0250    | 182.08 | 136.10 | 181.07 | C9H11NO3   | [M+H]+ | Amino acids and derivatives | L-Tyrosine*                                      |
| MWStz070   | 182.08 | 91.05  | 181.07 | C9H11NO3   | [M+H]+ | Alkaloids                   | N-(2-Hydroxy-4-methoxyphenyl)acetamide           |
| Zmsp000878 | 182.08 | 136.08 | 181.07 | C9H11NO3   | [M+H]+ | Alkaloids                   | 4-Hydroxy-5-(2-oxo-1-pyrrolidinyl)benzoic acid*  |
| MWS5206    | 181.05 | 135.04 | 182.06 | C9H10O4    | [M-H]- | Phenolic acids              | Hydroxyphenyllactic acid*                        |
| Lmrn001951 | 181.05 | 135.04 | 182.06 | C9H10O4    | [M-H]- | Phenolic acids              | (S)-2-Hydroxy-3-(4-Hydroxyphenyl)Propanoic Acid* |
| Hmtn001288 | 181.05 | 135.04 | 182.06 | C9H10O4    | [M-H]- | Phenolic acids              | Methyl 2,4-dihydroxyphenylacetate*               |
| mws1155    | 181.07 | 101.02 | 182.08 | C6H14O6    | [M-H]- | Others                      | Mannitol*                                        |
| pme2237    | 181.07 | 101.00 | 182.08 | C6H14O6    | [M-H]- | Others                      | Dulcitol*                                        |
| pme2596    | 184.06 | 148.00 | 183.05 | C8H9NO4    | [M+H]+ | Others                      | 4-Pyridoxic acid                                 |
| pmb1754    | 184.00 | 125.00 | 184.07 | C5H15NO4P+ | [M]+   | Alkaloids                   | O-Phosphocholine                                 |
| MWS1816    | 183.14 | 183.14 | 184.15 | C11H20O2   | [M-H]- | Lipids                      | 10-Undecenoic acid                               |
| mws0752    | 185.15 | 185.16 | 186.16 | C11H22O2   | [M-H]- | Lipids                      | Undecylic Acid                                   |
| Hmmp001310 | 188.07 | 118.07 | 187.06 | C11H9NO2   | [M+H]+ | Alkaloids                   | 3-Indoleacrylic acid                             |
| pme0137    | 187.07 | 125.00 | 188.08 | C7H12N2O4  | [M-H]- | Amino acids and derivatives | N-Acetyl-L-Glutamine                             |



|            |        |        |        |           |        |                             |                                            |
|------------|--------|--------|--------|-----------|--------|-----------------------------|--------------------------------------------|
| mws0237    | 187.10 | 125.00 | 188.11 | C9H16O4   | [M-H]- | Organic acids               | Azelaic acid                               |
| pme0122    | 189.12 | 126.00 | 188.12 | C8H16N2O3 | [M+H]+ | Amino acids and derivatives | N6-Acetyl-L-lysine                         |
| mws5041    | 189.12 | 86.10  | 188.12 | C8H16N2O3 | [M+H]+ | Amino acids and derivatives | L-Glycyl-L-isoleucine                      |
| Zmdp000292 | 189.14 | 70.07  | 188.13 | C7H16N4O2 | [M+H]+ | Amino acids and derivatives | Arginine methyl ester*                     |
| Zmjp000182 | 189.13 | 70.07  | 188.13 | C7H16N4O2 | [M+H]+ | Amino acids and derivatives | N-Monomethyl-L-arginine*                   |
| pme0075    | 188.06 | 128.00 | 189.06 | C7H11NO5  | [M-H]- | Amino acids and derivatives | N-Acetyl-L-glutamic acid                   |
| pme2244    | 190.09 | 118.07 | 189.07 | C11H11NO2 | [M+H]+ | Alkaloids                   | 3-Indolepropionic acid                     |
| mws0597    | 190.05 | 146.00 | 191.06 | C10H9NO3  | [M-H]- | Alkaloids                   | 5-Hydroxyindole-3-acetic acid              |
| Zmyn000453 | 191.02 | 111.01 | 192.03 | C6H8O7    | [M-H]- | Organic acids               | Isocitric Acid                             |
| Hmjp002337 | 193.04 | 133.03 | 192.03 | C10H8O4   | [M+H]+ | Lignans and Coumarins       | Isoscooletin (6-Hydroxy-7-Methoxycoumarin) |
| Cmpp003619 | 193.05 | 105.07 | 192.04 | C10H8O4   | [M+H]+ | Lignans and Coumarins       | 6,7-Dihydroxy-4-methylcoumarin             |
| pme2993    | 193.05 | 133.00 | 192.04 | C10H8O4   | [M+H]+ | Lignans and Coumarins       | Scopoletin (7-Hydroxy-6-methoxycoumarin)   |
| mws0277    | 191.06 | 85.00  | 192.06 | C7H12O6   | [M-H]- | Organic acids               | Quinic Acid                                |
| MWSslk144  | 193.09 | 147.04 | 192.08 | C11H12O3  | [M+H]+ | Phenolic acids              | p-Coumaric acid ethyl ester                |
| Lmmp002080 | 193.13 | 105.03 | 192.13 | C11H16N2O | [M+H]+ | Alkaloids                   | N-(4-Aminobutyl)benzamide                  |
| pme2743    | 194.08 | 91.00  | 193.07 | C10H11NO3 | [M+H]+ | Amino acids and derivatives | N-Phenylacetyl glycine                     |
| pme3705    | 193.04 | 73.00  | 194.04 | C6H10O7   | [M-H]- | Others                      | D-Glucuronic acid                          |
| Lmdn003756 | 193.05 | 135.05 | 194.06 | C10H10O4  | [M-H]- | Phenolic acids              | Methyl caffeate                            |
| MWSslk097  | 195.06 | 163.04 | 194.06 | C10H10O4  | [M+H]+ | Phenolic acids              | Dimethyl phthalate                         |
| XLn05261   | 195.03 | 108.02 | 196.04 | C9H8O5    | [M-H]- | Phenolic acids              | Salicylactic acid                          |
| pme0534    | 195.05 | 74.90  | 196.06 | C6H12O7   | [M-H]- | Others                      | Gluconic acid                              |
| Zmzn000079 | 199.00 | 78.96  | 200.01 | C4H9O7P   | [M-H]- | Others                      | D-Erythrose-4-phosphate                    |
| pmb2640    | 199.17 | 199.17 | 200.18 | C12H24O2  | [M-H]- | Lipids                      | Dodecanoic acid (Lauric acid)              |
| MWS5165    | 203.09 | 129.05 | 202.08 | C9H14O5   | [M+H]+ | Others                      | Methyloxalacetic Acid Diethyl Ester        |
| pmb0130    | 203.12 | 144.00 | 202.11 | C12H14N2O | [M+H]+ | Alkaloids                   | Acetryptine                                |
| MWS5164    | 203.15 | 70.07  | 202.14 | C8H18N4O2 | [M+H]+ | Amino acids and derivatives | N,N'-Dimethylarginine;SDMA                 |

|            |        |        |        |            |                    |                             |                                            |
|------------|--------|--------|--------|------------|--------------------|-----------------------------|--------------------------------------------|
| mws0018    | 203.22 | 83.00  | 202.22 | C10H26N4   | [M+H] <sup>+</sup> | Alkaloids                   | Spermine                                   |
| Zmbp002538 | 205.10 | 146.06 | 204.09 | C11H12N2O2 | [M+H] <sup>+</sup> | Alkaloids                   | 1-Methoxy-indole-3-acetamide               |
| mws0282    | 203.08 | 116.05 | 204.09 | C11H12N2O2 | [M-H] <sup>-</sup> | Amino acids and derivatives | L-Tryptophan                               |
| pmb0818    | 206.10 | 147.50 | 205.07 | C11H11NO3  | [M+H] <sup>+</sup> | Alkaloids                   | Methoxyindoleacetic acid                   |
| MWS0618    | 204.12 | 71.05  | 205.13 | C9H19NO4   | [M-H] <sup>-</sup> | Others                      | Pantothenol                                |
| MWS1877    | 205.16 | 133.06 | 206.17 | C14H22O    | [M-H] <sup>-</sup> | Phenolic acids              | 4-tert-Octylphenol                         |
| Lmbn013410 | 205.16 | 189.13 | 206.17 | C14H22O    | [M-H] <sup>-</sup> | Phenolic acids              | 2,4-Di-Tert-Butylphenol                    |
| Zmgn002106 | 206.08 | 58.03  | 207.09 | C11H13NO3  | [M-H] <sup>-</sup> | Amino acids and derivatives | N-Acetyl-L-phenylalanine                   |
| mws1014    | 209.04 | 149.10 | 208.04 | C10H8O5    | [M+H] <sup>+</sup> | Lignans and Coumarins       | Fraxetin (7,8-Dihydroxy-6-methoxycoumarin) |
| MA10107783 | 207.03 | 119.05 | 208.04 | C10H8O5    | [M-H] <sup>-</sup> | Phenolic acids              | 3-[(1-Carboxyvinyl)oxy]benzoic acid        |
| pme3443    | 207.07 | 192.00 | 208.07 | C11H12O4   | [M-H] <sup>-</sup> | Phenolic acids              | Sinapinaldehyde                            |
| mws2184    | 207.07 | 135.10 | 208.07 | C11H12O4   | [M-H] <sup>-</sup> | Phenolic acids              | Ethyl caffeate                             |
| pmb2620    | 207.07 | 133.10 | 208.07 | C11H12O4   | [M-H] <sup>-</sup> | Phenolic acids              | 3,4-Dimethoxycinnamic acid                 |
| mws1212    | 209.08 | 177.30 | 208.07 | C11H12O4   | [M+H] <sup>+</sup> | Phenolic acids              | Methyl ferulate                            |
| Zmyn000108 | 209.03 | 85.03  | 210.04 | C6H10O8    | [M-H] <sup>-</sup> | Others                      | D-Saccharic acid*                          |
| Zmpn000199 | 209.03 | 85.03  | 210.04 | C6H10O8    | [M-H] <sup>-</sup> | Others                      | D-Galactaric acid*                         |
| Hmcn000192 | 209.07 | 59.01  | 210.07 | C7H14O7    | [M-H] <sup>-</sup> | Others                      | Sedoheptulose                              |
| mws0853    | 209.08 | 179.00 | 210.09 | C11H14O4   | [M-H] <sup>-</sup> | Phenolic acids              | Sinapyl alcohol                            |
| pme1654    | 209.12 | 59.02  | 210.13 | C12H18O3   | [M-H] <sup>-</sup> | Organic acids               | Jasmonic acid                              |
| Zmgn003633 | 211.13 | 183.14 | 212.14 | C12H20O3   | [M-H] <sup>-</sup> | Lipids                      | 12-Oxo-10E-Dodecenoic Acid                 |
| mws1509    | 215.07 | 121.00 | 214.06 | C13H10O3   | [M+H] <sup>+</sup> | Phenolic acids              | Phenyl salicylate                          |
| mws0751    | 213.19 | 195.00 | 214.19 | C13H26O2   | [M-H] <sup>-</sup> | Lipids                      | Tridecanoic Acid                           |
| pme0170    | 217.13 | 158.00 | 216.12 | C8H16N4O3  | [M+H] <sup>+</sup> | Amino acids and derivatives | N-Acetyl-L-Arginine                        |
| MWS1900    | 215.13 | 153.13 | 216.14 | C11H20O4   | [M-H] <sup>-</sup> | Lipids                      | Undecanedioic acid                         |
| mws5045    | 215.17 | 169.16 | 216.17 | C12H24O3   | [M-H] <sup>-</sup> | Lipids                      | 12-Hydroxydodecanoic acid                  |
| pme2566    | 217.08 | 199.00 | 218.09 | C8H14N2O5  | [M-H] <sup>-</sup> | Amino acids and derivatives | 5-L-Glutamyl-L-amino acid                  |

|             |        |        |        |            |                    |                             |                                             |
|-------------|--------|--------|--------|------------|--------------------|-----------------------------|---------------------------------------------|
| mws0677     | 219.11 | 160.00 | 218.11 | C12H14N2O2 | [M+H] <sup>+</sup> | Alkaloids                   | N-Acetyl-5-hydroxytryptamine                |
| pmb0426     | 219.10 | 174.40 | 218.14 | C13H18N2O  | [M+H] <sup>+</sup> | Alkaloids                   | N,N-Dimethyl-5-methoxytryptamine            |
| MWSmce257   | 218.11 | 88.04  | 219.11 | C9H17NO5   | [M-H] <sup>-</sup> | Others                      | D-Pantothenic Acid                          |
| pme1228     | 221.09 | 204.00 | 220.09 | C11H12N2O3 | [M+H] <sup>+</sup> | Amino acids and derivatives | 5-Hydroxy-L-tryptophan                      |
| Hmyp009454  | 221.19 | 119.08 | 220.18 | C15H24O    | [M+H] <sup>+</sup> | Terpenoids                  | Nootkatol                                   |
| Zjyp102918  | 221.19 | 119.08 | 220.18 | C15H24O    | [M+H] <sup>+</sup> | Terpenoids                  | epinootkatol                                |
| Lmtp005226  | 221.19 | 105.07 | 220.18 | C15H24O    | [M+H] <sup>+</sup> | Others                      | Santalol                                    |
| pme2755     | 222.00 | 144.00 | 221.09 | C8H15NO6   | [M+H] <sup>+</sup> | Others                      | N-Acetyl-D-glucosamine                      |
| mws2608     | 222.10 | 84.05  | 221.09 | C8H15NO6   | [M+H] <sup>+</sup> | Others                      | N-Acetyl-D-galactosamine                    |
| MWS20178    | 223.06 | 190.03 | 222.05 | C11H10O5   | [M+H] <sup>+</sup> | Lignans and Coumarins       | isofraxidin                                 |
| mws5042     | 223.11 | 120.09 | 222.10 | C11H14N2O3 | [M+H] <sup>+</sup> | Amino acids and derivatives | L-Glycyl-L-phenylalanine                    |
| Hmcp003852  | 223.21 | 207.03 | 222.20 | C15H26O    | [M+H] <sup>+</sup> | Terpenoids                  | Elemol                                      |
| mws0520     | 224.09 | 136.00 | 223.08 | C11H13NO4  | [M+H] <sup>+</sup> | Amino acids and derivatives | N-Acetyl-L-tyrosine                         |
| HJAP044     | 225.11 | 167.06 | 224.11 | C12H16O4   | [M+H] <sup>+</sup> | Phenolic acids              | 1-(2,4,5-Trimethoxyphenyl)propan-1-one      |
| pme0220     | 225.15 | 151.11 | 224.14 | C13H20O3   | [M+H] <sup>+</sup> | Organic acids               | Methyl jasmonate                            |
| Cmsp002787  | 227.09 | 181.05 | 226.08 | C11H14O5   | [M+H] <sup>+</sup> | Phenolic acids              | 3,4'-Dihydroxy-3',5'-dimethoxypropiophenone |
| HJAP051     | 227.13 | 181.09 | 226.12 | C12H18O4   | [M+H] <sup>+</sup> | Phenolic acids              | 3-(3,4,5-Trimethoxyphenyl)propan-1-ol       |
| pme1194     | 228.10 | 112.00 | 227.09 | C9H13N3O4  | [M+H] <sup>+</sup> | Nucleotides and derivatives | 2'-Deoxycytidine                            |
| mws0119     | 227.20 | 227.20 | 228.21 | C14H28O2   | [M-H] <sup>-</sup> | Lipids                      | Myristic Acid                               |
| pma6455     | 229.01 | 96.97  | 230.02 | C5H11O8P   | [M-H] <sup>-</sup> | Others                      | Ribulose-5-phosphate                        |
| Zmwp007375  | 231.14 | 185.13 | 230.13 | C15H18O2   | [M+H] <sup>+</sup> | Terpenoids                  | Dehydrocostuslactone                        |
| mws0474     | 229.14 | 211.00 | 230.15 | C12H22O4   | [M-H] <sup>-</sup> | Organic acids               | Dodecanedioic acid                          |
| Lmhp001670  | 231.16 | 72.08  | 230.16 | C11H22N2O3 | [M+H] <sup>+</sup> | Amino acids and derivatives | L-Valyl-L-Leucine                           |
| Lmjip007763 | 233.15 | 187.15 | 232.15 | C15H20O2   | [M+H] <sup>+</sup> | Terpenoids                  | 6,7-Dehydroartemisinic acid                 |
| Lhhp102907  | 233.15 | 131.08 | 232.15 | C15H20O2   | [M+H] <sup>+</sup> | Terpenoids                  | Costunolide                                 |
| pmb0962     | 235.10 | 118.30 | 234.16 | C10H22N2O4 | [M+H] <sup>+</sup> | Amino acids and derivatives | L-Lysine-Butanoic Acid                      |

|            |        |        |        |             |                    |                             |                                   |
|------------|--------|--------|--------|-------------|--------------------|-----------------------------|-----------------------------------|
| Jmcp010061 | 235.17 | 189.16 | 234.16 | C15H22O2    | [M+H] <sup>+</sup> | Terpenoids                  | costic acid*                      |
| MWSmce502  | 235.17 | 189.16 | 234.16 | C15H22O2    | [M+H] <sup>+</sup> | Terpenoids                  | Artemisinic acid*                 |
| Jmbn003202 | 235.12 | 59.01  | 236.13 | C10H20O6    | [M-H] <sup>-</sup> | Others                      | Butyl Beta-D-Fructopyranoside     |
| Lmcp006516 | 237.18 | 201.16 | 236.18 | C15H24O2    | [M+H] <sup>+</sup> | Terpenoids                  | Baimuxinal                        |
| Lmyn000160 | 237.06 | 87.01  | 238.07 | C8H14O8     | [M-H] <sup>-</sup> | Phenolic acids              | Mucic acid Dimethyl Ester         |
| mws0221    | 241.03 | 152.00 | 240.02 | C6H12N2O4S2 | [M+H] <sup>+</sup> | Amino acids and derivatives | L-Cystine                         |
| MWS0552    | 239.20 | 223.03 | 240.21 | C15H28O2    | [M-H] <sup>-</sup> | Lipids                      | Cis-10-Pentadecenoic Acid(C15: 1) |
| pme0264    | 243.10 | 127.00 | 242.09 | C10H14N2O5  | [M+H] <sup>+</sup> | Nucleotides and derivatives | Thymidine                         |
| MWS2430    | 241.22 | 241.21 | 242.23 | C15H30O2    | [M-H] <sup>-</sup> | Lipids                      | 13-methylmyristic acid            |
| pme3732    | 244.09 | 112.00 | 243.09 | C9H13N3O5   | [M+H] <sup>+</sup> | Nucleotides and derivatives | Cytidine                          |
| ML10180524 | 244.09 | 112.05 | 243.09 | C9H13N3O5   | [M+H] <sup>+</sup> | Nucleotides and derivatives | Cytarabine                        |
| mws0248    | 243.06 | 110.00 | 244.07 | C9H12N2O6   | [M-H] <sup>-</sup> | Nucleotides and derivatives | Uridine                           |
| pme2266    | 245.10 | 227.00 | 244.09 | C10H16N2O3S | [M+H] <sup>+</sup> | Others                      | Biotin                            |
| Lmhp002031 | 245.18 | 86.10  | 244.18 | C12H24N2O3  | [M+H] <sup>+</sup> | Amino acids and derivatives | L-Leucyl-L-Leucine                |
| Zmdp001647 | 247.13 | 184.10 | 246.12 | C10H18N2O5  | [M+H] <sup>+</sup> | Amino acids and derivatives | γ-Glutamyl-L-valine               |
| MWSmce062  | 247.13 | 131.08 | 246.13 | C15H18O3    | [M+H] <sup>+</sup> | Terpenoids                  | Xanthatin                         |
| Hmcp003285 | 249.15 | 185.13 | 248.14 | C15H20O3    | [M+H] <sup>+</sup> | Terpenoids                  | Santamarin                        |
| Hmcn003273 | 247.13 | 203.14 | 248.14 | C15H20O3    | [M-H] <sup>-</sup> | Terpenoids                  | Reynosin                          |
| Qmqp102523 | 249.15 | 175.11 | 248.14 | C15H20O3    | [M+H] <sup>+</sup> | Terpenoids                  | Pechueloic acid                   |
| Lhhp102906 | 249.15 | 145.10 | 248.14 | C15H20O3    | [M+H] <sup>+</sup> | Terpenoids                  | Parthenolide                      |
| pme2563    | 249.06 | 128.00 | 250.06 | C8H14N2O5S  | [M-H] <sup>-</sup> | Amino acids and derivatives | γ-Glu-Cys                         |
| Jmcn007352 | 249.15 | 203.14 | 250.16 | C15H22O3    | [M-H] <sup>-</sup> | Terpenoids                  | 5α-Hydroxycostic acid             |
| pme3961    | 252.11 | 136.00 | 251.10 | C10H13N5O3  | [M+H] <sup>+</sup> | Nucleotides and derivatives | 2'-Deoxyadenosine                 |
| Lmcn009122 | 253.22 | 235.21 | 254.23 | C16H30O2    | [M-H] <sup>-</sup> | Lipids                      | (7Z)-Hexadecenoic acid            |
| mws0361    | 253.22 | 235.19 | 254.23 | C16H30O2    | [M-H] <sup>-</sup> | Lipids                      | Palmitoleic Acid                  |
| MWSHY0124  | 257.08 | 153.02 | 256.07 | C15H12O4    | [M+H] <sup>+</sup> | Flavonoids                  | Pinocembrin (Dihydrochrysin)      |

|            |        |        |        |            |        |                             |                                               |
|------------|--------|--------|--------|------------|--------|-----------------------------|-----------------------------------------------|
| pma3101    | 256.20 | 124.10 | 256.08 | C11H14NO6+ | [M+H]+ | Others                      | Nicotinate D-ribonucleoside                   |
| mws1488    | 255.23 | 237.22 | 256.24 | C16H32O2   | [M-H]- | Lipids                      | Palmitic acid                                 |
| mws0120    | 258.11 | 104.11 | 257.10 | C8H20NO6P  | [M+H]+ | Lipids                      | Choline Alfoscerate                           |
| MWSslk133  | 257.18 | 195.18 | 258.18 | C14H26O4   | [M-H]- | Lipids                      | 1,14-Tetradecanedioic Acid                    |
| Zmyn000110 | 258.04 | 78.96  | 259.05 | C6H14NO8P  | [M-H]- | Others                      | D-Glucosamine 1-phosphate                     |
| mws0866    | 259.02 | 97.00  | 260.03 | C6H13O9P   | [M-H]- | Others                      | D-Glucose 6-phosphate*                        |
| MWS2442    | 259.02 | 96.97  | 260.03 | C6H13O9P   | [M-H]- | Others                      | D-Fructose 6-Phosphate*                       |
| Zmdp002216 | 261.14 | 86.10  | 260.14 | C11H20N2O5 | [M+H]+ | Amino acids and derivatives | L-γ-Glutamyl-L-leucine                        |
| MWS4309    | 262.12 | 188.07 | 261.11 | C13H15N3O3 | [M+H]+ | Amino acids and derivatives | Glycyl-tryptophan                             |
| Zmpn000095 | 261.04 | 78.96  | 262.05 | C6H15O9P   | [M-H]- | Others                      | Sorbitol-6-phosphate                          |
| Lmhp001732 | 263.13 | 70.07  | 262.13 | C14H18N2O3 | [M+H]+ | Amino acids and derivatives | L-Prolyl-L-Phenylalanine                      |
| mws0715    | 263.10 | 145.00 | 264.11 | C13H16N2O4 | [M-H]- | Amino acids and derivatives | Phenylacetyl-L-glutamine                      |
| Lmtn004049 | 263.13 | 204.12 | 264.14 | C15H20O4   | [M-H]- | Organic acids               | Abscisic acid                                 |
| Lmhp002001 | 265.15 | 72.08  | 264.15 | C14H20N2O3 | [M+H]+ | Amino acids and derivatives | L-Valyl-L-Phenylalanine                       |
| Zmgn001039 | 266.09 | 134.05 | 267.08 | C9H17NO6S  | [M-H]- | Amino acids and derivatives | S-Ribosyl-L-homocysteine                      |
| Zmjp000966 | 268.11 | 136.06 | 267.10 | C10H13N5O4 | [M+H]+ | Others                      | Vidarabine*                                   |
| pme0230    | 268.10 | 136.06 | 267.10 | C10H13N5O4 | [M+H]+ | Nucleotides and derivatives | Adenosine*                                    |
| pma2172    | 268.13 | 121.00 | 267.13 | C17H17NO2  | [M+H]+ | Alkaloids                   | Cinnamoyltyramine                             |
| mws0037    | 267.07 | 252.00 | 268.07 | C16H12O4   | [M-H]- | Flavonoids                  | Formononetin (7-Hydroxy-4'-methoxyisoflavone) |
| mws1060    | 267.07 | 135.00 | 268.08 | C10H12N4O5 | [M-H]- | Nucleotides and derivatives | 9-(Arabinosyl)hypoxanthine                    |
| MWS20151   | 271.06 | 153.02 | 270.05 | C15H10O5   | [M+H]+ | Flavonoids                  | Apigenin; 4',5,7-Trihydroxyflavone            |
| MWS20169   | 269.05 | 254.02 | 270.05 | C15H10O5   | [M-H]- | Quinones                    | 2,5-dihydroxy-1-methoxy-anthraquinone         |
| Lmyn006227 | 269.05 | 151.00 | 270.05 | C15H10O5   | [M-H]- | Flavonoids                  | 3,5,7-Trihydroxyflavone                       |
| mws1297    | 269.10 | 101.02 | 270.11 | C13H18O6   | [M-H]- | Phenolic acids              | Benzyl glucoside                              |
| MWSmce675  | 271.08 | 108.02 | 272.09 | C12H16O7   | [M-H]- | Phenolic acids              | Arbutin*                                      |
| Ymjm000152 | 271.08 | 108.02 | 272.09 | C12H16O7   | [M-H]- | Phenolic acids              | p-Hydroxypheny-β-D-allopyranoside*            |

|             |        |        |        |             |        |                             |                                       |
|-------------|--------|--------|--------|-------------|--------|-----------------------------|---------------------------------------|
| Lmmn003323  | 271.23 | 225.22 | 272.24 | C16H32O3    | [M-H]- | Organic acids               | 2-Hydroxyhexadecanoic acid            |
| pmp001264   | 274.27 | 256.27 | 273.27 | C16H35NO2   | [M+H]+ | Lipids                      | Hexadecylsphingosine                  |
| pme1201     | 273.08 | 167.00 | 274.08 | C15H14O5    | [M-H]- | Flavonoids                  | Phloretin                             |
| pmb0034     | 277.10 | 114.70 | 276.10 | C10H16N2O7  | [M+H]+ | Amino acids and derivatives | L- $\alpha$ -Glutamyl-L-Glutamic Acid |
| pmb1574     | 277.20 | 93.00  | 276.21 | C18H28O2    | [M+H]+ | Lipids                      | 9,12-Octadecadien-6-Ynoic Acid        |
| mws1038     | 277.12 | 146.00 | 278.13 | C11H22N2O4S | [M-H]- | Others                      | Pantetheine                           |
| Lmlp012720  | 279.16 | 149.02 | 278.15 | C16H22O4    | [M+H]+ | Phenolic acids              | Dibutyl phthalate*                    |
| Lm xp011770 | 279.16 | 149.02 | 278.15 | C16H22O4    | [M+H]+ | Phenolic acids              | Diisobutyl phthalate*                 |
| mws5035     | 279.17 | 120.08 | 278.16 | C15H22N2O3  | [M+H]+ | Amino acids and derivatives | L-Leucyl-L-phenylalanine              |
| mws0367     | 277.22 | 277.22 | 278.23 | C18H30O2    | [M-H]- | Lipids                      | $\alpha$ -Linolenic Acid              |
| MWSmce692   | 277.22 | 59.01  | 278.23 | C18H30O2    | [M-H]- | Lipids                      | $\gamma$ -Linolenic Acid              |
| pmb1650     | 279.20 | 149.40 | 278.23 | C18H30O2    | [M+H]+ | Lipids                      | Octadeca-11E,13E,15Z-trienoic acid    |
| Lmbn005923  | 277.22 | 59.01  | 278.23 | C18H30O2    | [M-H]- | Lipids                      | Crepenynic acid                       |
| Wmln002759  | 278.11 | 131.04 | 279.29 | C14H17NO5   | [M-H]- | Alkaloids                   | 4-(Rhamnosyloxy)phenylacetonitrile    |
| Lmhn002926  | 279.05 | 163.04 | 280.06 | C13H12O7    | [M-H]- | Phenolic acids              | p-Coumaroylmalic acid                 |
| mws0629     | 281.11 | 166.00 | 280.11 | C13H16N2O5  | [M+H]+ | Amino acids and derivatives | L-Aspartyl-L-Phenylalanine            |
| mws1491     | 279.23 | 279.23 | 280.24 | C18H32O2    | [M-H]- | Lipids                      | Linoleic acid                         |
| Lmbn006152  | 279.23 | 59.01  | 280.24 | C18H32O2    | [M-H]- | Lipids                      | (9Z,11E)-Octadecadienoic acid         |
| Hmhp001812  | 282.12 | 136.06 | 281.11 | C11H15N5O4  | [M+H]+ | Nucleotides and derivatives | 2'-O-Methyladenosine                  |
| YC512118    | 282.28 | 247.24 | 281.27 | C18H35NO    | [M+H]+ | Lipids                      | Oleamide (9-Octadecenamide)           |
| Lmyn012331  | 281.25 | 281.25 | 282.26 | C18H34O2    | [M-H]- | Lipids                      | Petroselinic acid                     |
| mws2623     | 281.25 | 281.25 | 282.26 | C18H34O2    | [M-H]- | Lipids                      | 11-Octadecanoic acid(Vaccenic acid)   |
| pme1178     | 284.10 | 152.00 | 283.09 | C10H13N5O5  | [M+H]+ | Nucleotides and derivatives | Guanosine                             |
| MWSmce089   | 284.12 | 147.04 | 283.12 | C17H17NO3   | [M+H]+ | Alkaloids                   | p-Coumaroyltyramine                   |
| Zmzp005934  | 284.30 | 102.09 | 283.29 | C18H37NO    | [M+H]+ | Alkaloids                   | Stearamide                            |
| mws0129     | 285.08 | 270.00 | 284.07 | C16H12O5    | [M+H]+ | Flavonoids                  | Apigenin 7-methyl ether*              |

|            |        |        |        |            |        |                             |                                                |
|------------|--------|--------|--------|------------|--------|-----------------------------|------------------------------------------------|
| mws0051    | 285.08 | 270.00 | 284.07 | C16H12O5   | [M+H]+ | Flavonoids                  | Acacetin*                                      |
| mws0918    | 283.06 | 268.00 | 284.07 | C16H12O5   | [M-H]- | Flavonoids                  | Prunetin (5,4'-Dihydroxy-7-methoxyisoflavone)  |
| mws4160    | 285.08 | 270.07 | 284.07 | C16H12O5   | [M+H]+ | Flavonoids                  | 5,7-Dihydroxy-8-Methoxyflavone*                |
| mws0668    | 283.07 | 151.00 | 284.08 | C10H12N4O6 | [M-H]- | Nucleotides and derivatives | Xanthosine                                     |
| mws1505    | 283.10 | 135.00 | 284.11 | C17H16O4   | [M-H]- | Phenolic acids              | Phenethyl caffeate                             |
| Zmyn005026 | 283.26 | 283.26 | 284.27 | C18H36O2   | [M-H]- | Lipids                      | 16-Methylheptadecanoic acid                    |
| mws1489    | 283.26 | 283.26 | 284.27 | C18H36O2   | [M-H]- | Lipids                      | Stearic Acid                                   |
| Hmbp002730 | 287.06 | 153.01 | 286.05 | C15H10O6   | [M+H]+ | Flavonoids                  | Isoscutellarein*                               |
| Lmmp004504 | 287.06 | 153.02 | 286.05 | C15H10O6   | [M+H]+ | Flavonoids                  | 2'-Hydroxygenistein*                           |
| MWSHY0058  | 287.06 | 153.02 | 286.05 | C15H10O6   | [M+H]+ | Flavonoids                  | Luteolin (5,7,3',4'-Tetrahydroxyflavone)*      |
| MWSslk132  | 285.21 | 223.21 | 286.21 | C16H30O4   | [M-H]- | Lipids                      | Hexadecanedioic acid                           |
| pme2289    | 287.20 | 119.00 | 286.23 | C20H30O    | [M+H]+ | Others                      | Vitamin A (Retinol)                            |
| pmp000727  | 288.13 | 177.05 | 287.13 | C15H17N3O3 | [M+H]+ | Alkaloids                   | Feruloylhistamine                              |
| MWSHY0145  | 289.07 | 153.02 | 288.06 | C15H12O6   | [M+H]+ | Flavonoids                  | Eriodictyol (5,7,3',4'-Tetrahydroxyflavanone)* |
| Cmxp005429 | 289.07 | 153.02 | 288.06 | C15H12O6   | [M+H]+ | Flavonoids                  | Okanin*                                        |
| Lmsp004137 | 289.07 | 163.04 | 288.06 | C15H12O6   | [M+H]+ | Flavonoids                  | 3,4,2',4',6'-Pentahydroxychalcone              |
| pmn001686  | 287.22 | 241.22 | 288.23 | C16H32O4   | [M-H]- | Lipids                      | 10,16-Dihydroxypalmitic acid                   |
| mws1496    | 290.18 | 124.00 | 289.17 | C17H23NO3  | [M+H]+ | Alkaloids                   | L-Hyoscyamine                                  |
| pmb3081    | 289.00 | 97.00  | 290.00 | C6H11PO11  | [M-H]- | Others                      | Glucarate O-Phosphoric acid                    |
| pme3163    | 289.00 | 97.00  | 290.04 | C7H15O10P  | [M-H]- | Others                      | D-Sedoheptulose 7-phosphate                    |
| pmb0885    | 291.00 | 190.90 | 290.19 | C18H26O3   | [M+H]+ | Lipids                      | 4-Oxo-9Z,11Z,13E,15E-Octadecatetraenoic Acid   |
| Zmyn004548 | 291.20 | 235.17 | 292.20 | C18H28O3   | [M-H]- | Lipids                      | 12-Oxo-phytodienoic acid                       |
| MWSmce689  | 293.25 | 95.09  | 292.24 | C19H32O2   | [M+H]+ | Lipids                      | Methyl linolenate                              |
| Zmdn001564 | 293.11 | 164.07 | 294.12 | C14H18N2O5 | [M-H]- | Amino acids and derivatives | $\gamma$ -Glutamylphenylalanine                |
| Zmyn004676 | 293.21 | 113.10 | 294.22 | C18H30O3   | [M-H]- | Lipids                      | 17-Hydroxylinolenic acid                       |
| Zmyn004732 | 293.21 | 185.12 | 294.22 | C18H30O3   | [M-H]- | Lipids                      | 2R-hydroxy-9Z,12Z,15Z-octadecatrienoic acid    |

|            |        |        |        |             |        |                             |                                                        |
|------------|--------|--------|--------|-------------|--------|-----------------------------|--------------------------------------------------------|
| pmb2787    | 293.21 | 275.10 | 294.22 | C18H30O3    | [M-H]- | Lipids                      | 9-Oxo-10E,12Z-octadecadienoic acid                     |
| Lmbn005443 | 293.21 | 235.17 | 294.22 | C18H30O3    | [M-H]- | Lipids                      | 13-KODE; (9Z,11E)-13-Oxo-octadeca-9,11-dienoic acid    |
| Lmqp000329 | 296.07 | 104.11 | 295.06 | C8H14N3O7P  | [M+H]+ | Nucleotides and derivatives | 5-Aminoimidazole ribonucleotide                        |
| Lmhn102068 | 295.05 | 179.03 | 296.05 | C13H12O8    | [M-H]- | Phenolic acids              | 2-O-Caffeoylmalic acid                                 |
| Hmqp005411 | 297.24 | 81.07  | 296.23 | C18H32O3    | [M+H]+ | Lipids                      | 9-Oxo-12Z-Octadecenoic acid                            |
| Hmqp005455 | 297.24 | 81.07  | 296.23 | C18H32O3    | [M+H]+ | Lipids                      | 15(R)-Hydroxylinoleic Acid                             |
| Lmbn005662 | 295.23 | 171.10 | 296.24 | C18H32O3    | [M-H]- | Lipids                      | 9(10)-EpOME;(9R,10S)-(12Z)-9,10-Epoxyoctadecenoic acid |
| Rfmb091    | 295.23 | 195.14 | 296.24 | C18H32O3    | [M-H]- | Lipids                      | 9S-Hydroxy-10E,12Z-octadecadienoic acid                |
| pmb2799    | 295.23 | 195.20 | 296.24 | C18H32O3    | [M-H]- | Lipids                      | 12,13-Epoxy-9-Octadecenoic Acid                        |
| pme1474    | 298.10 | 136.00 | 297.09 | C11H15N5O3S | [M+H]+ | Nucleotides and derivatives | 5'-Deoxy-5'-(methylthio)adenosine                      |
| pmb0197    | 298.10 | 166.30 | 297.11 | C11H15N5O5  | [M+H]+ | Nucleotides and derivatives | N7-Methylguanosine                                     |
| Zmyn004714 | 297.24 | 183.14 | 298.25 | C18H34O3    | [M-H]- | Lipids                      | Ricinoleic acid                                        |
| pmf0297    | 297.32 | 183.10 | 298.32 | C20H42O     | [M-H]- | Lipids                      | 1-Eicosanol                                            |
| mws0058    | 299.06 | 284.00 | 300.06 | C16H12O6    | [M-H]- | Flavonoids                  | Diosmetin (5,7,3'-Trihydroxy-4'-methoxyflavone)*       |
| MWSHY0069  | 301.07 | 286.05 | 300.06 | C16H12O6    | [M+H]+ | Flavonoids                  | Hispidulin (5,7,4'-Trihydroxy-6-methoxyflavone)*       |
| MWS20189   | 301.07 | 286.05 | 300.06 | C16H12O6    | [M+H]+ | Flavonoids                  | Tectorigenin*                                          |
| Zmhn003257 | 299.06 | 284.04 | 300.06 | C16H12O6    | [M-H]- | Flavonoids                  | 5,7,2'-Trihydroxy-8-methoxyflavone*                    |
| Zmhn001926 | 299.08 | 137.02 | 300.08 | C13H16O8    | [M-H]- | Phenolic acids              | 1-O-Salicyloyl-β-D-glucose*                            |
| Zmhn001358 | 299.08 | 137.02 | 300.08 | C13H16O8    | [M-H]- | Phenolic acids              | 4-O-Glucosyl-4-hydroxybenzoic acid*                    |
| pmc1990    | 299.10 | 223.10 | 300.10 | C17H16O5    | [M-H]- | Flavonoids                  | 4'-Hydroxy-5,7-dimethoxyflavanone                      |
| mws2367    | 299.11 | 119.00 | 300.12 | C14H20O7    | [M-H]- | Phenolic acids              | Salidroside                                            |
| MWS5235    | 299.26 | 253.25 | 300.27 | C18H36O3    | [M-H]- | Lipids                      | 12-Hydroxyoctadecanoic acid                            |
| Zmyn005384 | 299.26 | 253.26 | 300.27 | C18H36O3    | [M-H]- | Lipids                      | 2R-Hydroxyoctadecanoic Acid                            |
| pmp001176  | 302.14 | 103.10 | 301.13 | C17H19NO4   | [M+H]+ | Alkaloids                   | Dihydrocaffeoyltyramine                                |
| MWSmce521  | 302.17 | 137.06 | 301.17 | C18H23NO3   | [M+H]+ | Alkaloids                   | Dobutamine                                             |



|             |        |        |        |             |        |                             |                                                           |
|-------------|--------|--------|--------|-------------|--------|-----------------------------|-----------------------------------------------------------|
| mws0920     | 301.04 | 151.00 | 302.04 | C15H10O7    | [M-H]- | Flavonoids                  | Tricetin (5,7,3',4',5'-Pentahydroxyflavone)               |
| Zmhn000892  | 301.09 | 139.05 | 302.10 | C13H18O8    | [M-H]- | Phenolic acids              | 4-O-Glucosyl-3,4-dihydroxybenzyl alcohol                  |
| MWSmce549   | 303.25 | 57.07  | 302.25 | C17H34O4    | [M+H]+ | Lipids                      | 1-Monomyristin                                            |
| mws1375     | 304.15 | 185.09 | 303.14 | C12H21N3O6  | [M+H]+ | Alkaloids                   | Nicotianamine                                             |
| mws0042     | 305.07 | 125.00 | 306.07 | C15H14O7    | [M-H]- | Flavonoids                  | Epigallocatechin                                          |
| pme1373     | 306.05 | 110.00 | 307.06 | C9H14N3O7P  | [M-H]- | Nucleotides and derivatives | 2'-Deoxycytidine-5'-monophosphate                         |
| pme1086     | 306.08 | 143.00 | 307.08 | C10H17N3O6S | [M-H]- | Amino acids and derivatives | Glutathione reduced form                                  |
| pmb2601     | 307.10 | 161.10 | 308.09 | C15H16O7    | [M-H]- | Lignans and Coumarins       | 7-Hydroxycoumarin-O-rhamnoside                            |
| pmn001610   | 307.26 | 307.30 | 308.27 | C20H36O2    | [M-H]- | Lipids                      | Eicosadienoic acid                                        |
| pmb2857     | 308.10 | 146.10 | 309.11 | C11H19NO9   | [M-H]- | Amino acids and derivatives | L-Glutamic acid-O-glycoside                               |
| Lmhn003074  | 309.06 | 193.05 | 310.07 | C14H14O8    | [M-H]- | Phenolic acids              | Feruloylmalic acid                                        |
| pmb2791     | 309.21 | 209.10 | 310.10 | C18H30O4    | [M-H]- | Lipids                      | 9-Hydroperoxy-10E,12,15Z-octadecatrienoic acid            |
| Zmzn003953  | 309.20 | 227.20 | 310.21 | C18H30O4    | [M-H]- | Lipids                      | 13(s)-hydroperoxy-(9z,11e,15z)-octadecatrienoic acid      |
| Hmqp006221  | 311.26 | 279.32 | 310.25 | C19H34O3    | [M+H]+ | Lipids                      | 13-Hydroxy-9Z,11E-octadecadienoic acid                    |
| Lmtp001399  | 312.11 | 150.05 | 311.10 | C14H17NO7   | [M+H]+ | Alkaloids                   | 5,6-Dihydroxyindole-5-O- $\beta$ -glucoside               |
| pme3967     | 312.13 | 180.00 | 311.12 | C12H17N5O5  | [M+H]+ | Nucleotides and derivatives | 2-(Dimethylamino)guanosine                                |
| pmb2804     | 311.10 | 171.30 | 312.23 | C18H32O4    | [M-H]- | Lipids                      | 13S-Hydroperoxy-9Z,11E-octadecadienoic acid               |
| pmn001689   | 311.22 | 223.17 | 312.23 | C18H32O4    | [M-H]- | Lipids                      | 9-Hydroxy-12-oxo-15(Z)-octadecenoic acid<br>5S,8R-DiHOME; |
| Lmbn004685  | 311.22 | 223.17 | 312.23 | C18H32O4    | [M-H]- | Lipids                      | (5S,8R,9Z,12Z)-5,8-Dihydroxyoctadeca-9,12-dienoate        |
| HJAP057     | 315.09 | 282.06 | 314.08 | C17H14O6    | [M+H]+ | Flavonoids                  | Dihydroxy-dimethoxyflavone*                               |
| MWSmce415   | 315.09 | 282.06 | 314.08 | C17H14O6    | [M+H]+ | Flavonoids                  | 4',5-dihydroxy-6,7-dimethoxyflavone*                      |
| Hm xp007521 | 315.09 | 300.06 | 314.08 | C17H14O6    | [M+H]+ | Flavonoids                  | 3',4'-Dihydroxy-7,5'-dimethoxyflavone                     |
| Lmyn002403  | 313.09 | 101.02 | 314.10 | C14H18O8    | [M-H]- | Phenolic acids              | Mandelic acid- $\beta$ -glucoside                         |
| Lmmm002179  | 313.09 | 107.05 | 314.10 | C14H18O8    | [M-H]- | Phenolic acids              | Methyl salicylate-2-O-glucoside                           |
| Lmbn005487  | 313.24 | 251.24 | 314.25 | C18H34O4    | [M-H]- | Lipids                      | 12,13-DHOME; (9Z)-12,13-Dihydroxyoctadec-9-enoic acid     |

|            |        |        |        |             |        |                             |                                                     |
|------------|--------|--------|--------|-------------|--------|-----------------------------|-----------------------------------------------------|
| Lmbn007891 | 313.24 | 183.14 | 314.25 | C18H34O4    | [M-H]- | Lipids                      | Hydroxy ricinoleic acid                             |
| pmp000003  | 317.07 | 302.04 | 316.06 | C16H12O7    | [M+H]+ | Flavonoids                  | 5,7,3',4'-Tetrahydroxy-6-methoxyflavone             |
| mws0066    | 315.05 | 151.00 | 316.06 | C16H12O7    | [M-H]- | Flavonoids                  | Isorhamnetin                                        |
| pmn001367  | 315.07 | 153.02 | 316.08 | C13H16O9    | [M-H]- | Phenolic acids              | Protocatechuic acid-4-O-glucoside*                  |
| pmb2871    | 315.07 | 153.00 | 316.08 | C13H16O9    | [M-H]- | Phenolic acids              | 1-O-Gentisoyl-β-D-glucoside*                        |
| Jmwn002172 | 315.11 | 135.04 | 316.12 | C14H20O8    | [M-H]- | Phenolic acids              | 3,4-dihydroxyphenylethanol-β-D-glucopyranoside      |
| Zmtn001661 | 315.11 | 153.02 | 316.12 | C14H20O8    | [M-H]- | Phenolic acids              | Vanilloside                                         |
| Hmtn001120 | 315.11 | 153.06 | 316.12 | C14H20O8    | [M-H]- | Phenolic acids              | 5-(2-Hydroxyethyl)-2-O-glucosylphenol               |
| pmb0751    | 321.10 | 147.30 | 320.09 | C16H16O7    | [M+H]+ | Phenolic acids              | Trans-5-O-(p-Coumaroyl)shikimate                    |
| mws0582    | 322.11 | 130.00 | 321.10 | C11H19N3O6S | [M+H]+ | Amino acids and derivatives | S-(Methyl)glutathione                               |
| pme2074    | 322.40 | 129.70 | 323.21 | C18H29NO4   | [M-H]- | Organic acids               | (-)-Jasmonoyl-L-Isoleucine                          |
| pme3188    | 323.03 | 211.00 | 324.04 | C9H13N2O9P  | [M-H]- | Nucleotides and derivatives | Uridine 5'-monophosphate                            |
| Lmbp003825 | 325.09 | 163.04 | 324.09 | C15H16O8    | [M+H]+ | Lignans and Coumarins       | Skimmin (7-Hydroxycoumarin-7-O-glucoside)           |
| Hmqp006023 | 326.27 | 309.27 | 324.27 | C20H36O3    | [M+H]+ | Lipids                      | Ethyl 9-Hydroxy-10,12-octadecadienoic acid          |
| mws0983    | 326.31 | 62.06  | 325.30 | C20H39NO2   | [M+H]+ | Alkaloids                   | N-Oleoyl ethanolamine                               |
| pmn001419  | 325.09 | 163.04 | 326.10 | C15H18O8    | [M-H]- | Phenolic acids              | 1-O-p-Coumaroyl-β-D-glucose                         |
| Jmwn002494 | 325.09 | 119.05 | 326.10 | C15H18O8    | [M-H]- | Phenolic acids              | (2E)-3-[4-(β-D-glucopyranoside)-phenylacrylic]-acid |
| Hmhn003067 | 325.09 | 119.05 | 326.10 | C15H18O8    | [M-H]- | Phenolic acids              | Phenylpropionic acid-O-β-D-glucopyranoside          |
| HX1255     | 327.16 | 203.11 | 326.15 | C20H22O4    | [M+H]+ | Lignans and Coumarins       | (+)-trans-1,2-dihydrodehydroguaiaretic acid         |
| pmn001691  | 327.22 | 291.20 | 328.23 | C18H32O5    | [M-H]- | Lipids                      | 9,12,13-Trihydroxy-10,15-octadecadienoic acid       |
| mws0884    | 328.05 | 134.20 | 329.05 | C10H12N5O6P | [M-H]- | Nucleotides and derivatives | Cyclic 3',5'-Adenylic acid                          |
| MWSHY0169  | 331.08 | 301.04 | 330.07 | C17H14O7    | [M+H]+ | Flavonoids                  | 4',5,7-Trihydroxy-3',6-dimethoxyflavone             |
| pmp001168  | 331.08 | 168.00 | 330.07 | C17H14O7    | [M+H]+ | Flavonoids                  | Iristectorigenin B                                  |
| Hmgp003130 | 331.08 | 316.05 | 330.08 | C17H14O7    | [M+H]+ | Flavonoids                  | Iristectorigenin A                                  |
| Lmtn002565 | 329.11 | 167.03 | 330.10 | C14H18O9    | [M-H]- | Phenolic acids              | 1-O-Vanilloyl-D-Glucose*                            |
| Lmmn003663 | 329.09 | 167.04 | 330.10 | C14H18O9    | [M-H]- | Phenolic acids              | 5-Glucosyloxy-2-Hydroxybenzoic acid methyl ester*   |

|            |        |        |        |             |        |                             |                                                             |
|------------|--------|--------|--------|-------------|--------|-----------------------------|-------------------------------------------------------------|
| pmn001517  | 329.12 | 167.00 | 330.13 | C15H22O8    | [M-H]- | Phenolic acids              | 3,4,5-Trimethoxyphenyl-1-O-Glucoside                        |
| Hmqn003054 | 329.23 | 311.23 | 330.24 | C18H34O5    | [M-H]- | Lipids                      | 9,10,11-Trihydroxy-12-octadecenoic acid<br>9,12,13-TriHOME; |
| Lmbn003970 | 329.23 | 211.14 | 330.24 | C18H34O5    | [M-H]- | Lipids                      | 9(S),12(S),13(S)-Trihydroxy-10(E)-octadecenoic acid         |
| pmp001284  | 331.28 | 313.27 | 330.28 | C19H38O4    | [M+H]+ | Lipids                      | Monopalmitin                                                |
| pme3184    | 332.08 | 136.00 | 331.07 | C10H14N5O6P | [M+H]+ | Nucleotides and derivatives | 2'-Deoxyadenosine-5'-monophosphate                          |
| pmb0789    | 332.13 | 152.07 | 331.13 | C14H21NO8   | [M+H]+ | Others                      | Pyridoxine-5'-O-glucoside                                   |
| pmc0066    | 333.05 | 137.05 | 332.05 | C10H13N4O7P | [M+H]+ | Nucleotides and derivatives | 2'-Deoxyinosine-5'-monophosphate                            |
| Lmjn004351 | 331.05 | 165.99 | 332.05 | C16H12O8    | [M-H]- | Flavonoids                  | Quercetagenin-4'-Methyl Ether                               |
| Lmpn007255 | 331.04 | 316.02 | 332.05 | C16H12O8    | [M-H]- | Flavonoids                  | Patuletin (Quercetagenin-6-methyl ether)                    |
| Hmln000873 | 331.07 | 169.01 | 332.08 | C13H16O10   | [M-H]- | Phenolic acids              | 2-O-Galloyl-D-glucose<br>2-(3,4-dihydroxyphenyl)ethanediol  |
| Jmwn002117 | 331.10 | 153.02 | 332.11 | C14H20O9    | [M-H]- | Phenolic acids              | 1-O-β-D-glucopyranoside*                                    |
| Lmmn001294 | 331.10 | 153.02 | 332.11 | C14H20O9    | [M-H]- | Phenolic acids              | Koaburaside*                                                |
| Hmln002806 | 335.08 | 179.03 | 336.09 | C16H16O8    | [M-H]- | Phenolic acids              | 5-O-Caffeoylshikimic acid                                   |
| pmb2636    | 335.10 | 253.10 | 336.23 | C20H32O4    | [M-H]- | Lipids                      | 8,15-Dihydroxy-5,9,11,13-eicosatetraenoic acid              |
| pmn001421  | 337.09 | 191.05 | 338.10 | C16H18O8    | [M-H]- | Phenolic acids              | 3-O-p-Coumaroylquinic acid*                                 |
| pmb3074    | 337.09 | 191.05 | 338.10 | C16H18O8    | [M-H]- | Phenolic acids              | 5-O-p-Coumaroylquinic acid*                                 |
| pmb4777    | 337.09 | 161.10 | 338.10 | C16H18O8    | [M-H]- | Lignans and Coumarins       | 4-Hydroxy-7-methoxycoumarin-β-rhamnoside                    |
| Zmyn000083 | 338.99 | 78.96  | 340.00 | C6H14O12P2  | [M-H]- | Others                      | D-Glucose 1,6-bisphosphate                                  |
| Cmyn001328 | 339.07 | 177.02 | 340.08 | C15H16O9    | [M-H]- | Lignans and Coumarins       | Daphnin*                                                    |
| mws1015    | 339.07 | 177.00 | 340.08 | C15H16O9    | [M-H]- | Lignans and Coumarins       | Esculin (6,7-DihydroxyCoumarin-6-glucoside)*                |
| Lmbn001162 | 339.07 | 177.02 | 340.08 | C15H16O9    | [M-H]- | Lignans and Coumarins       | Esculetin-7-O-glucoside*                                    |
| Hmcn004128 | 339.11 | 159.04 | 340.12 | C16H20O8    | [M-H]- | Phenolic acids              | P-Methoxycinnamate glucoside                                |
| Lmsn002548 | 341.09 | 161.02 | 342.10 | C15H18O9    | [M-H]- | Phenolic acids              | 1-O-Caffeoyl-β-D-glucose*                                   |
| Jmwn002620 | 341.09 | 161.02 | 342.10 | C15H18O9    | [M-H]- | Phenolic acids              | Vanillic Acid-4-O-Glucuronide*                              |

|            |        |        |        |             |        |                             |                                                   |
|------------|--------|--------|--------|-------------|--------|-----------------------------|---------------------------------------------------|
| mws0264    | 341.11 | 119.00 | 342.12 | C12H22O11   | [M-H]- | Others                      | D-Trehalose                                       |
| mws0906    | 341.12 | 179.00 | 342.13 | C16H22O8    | [M-H]- | Phenolic acids              | Coniferin                                         |
| Lmjn005592 | 343.08 | 313.04 | 344.09 | C18H16O7    | [M-H]- | Flavonoids                  | 4',5-Dihydroxy-3',6,7-trimethoxyflavone           |
| Lmmn000774 | 343.10 | 181.05 | 344.11 | C15H20O9    | [M-H]- | Phenolic acids              | Dihydrocaffeoylglucose                            |
| mws0609    | 344.04 | 150.00 | 345.05 | C10H12N5O7P | [M-H]- | Nucleotides and derivatives | Guanosine 3',5'-cyclic monophosphate              |
| Hmcp003223 | 347.07 | 332.05 | 346.07 | C17H14O8    | [M+H]+ | Flavonoids                  | Limocitrin                                        |
| Hmcp003163 | 347.08 | 332.05 | 346.07 | C17H14O8    | [M+H]+ | Flavonoids                  | Laciniatin                                        |
| Lmtn000940 | 345.08 | 139.04 | 346.09 | C14H18O10   | [M-H]- | Phenolic acids              | 1-O-(3,4-Dihydroxy-5-methoxy-benzoyl)-glucoside   |
| pmb0981    | 348.07 | 136.00 | 347.06 | C10H14N5O7P | [M+H]+ | Nucleotides and derivatives | Adenosine 5'-monophosphate                        |
| pmb2848    | 347.10 | 267.10 | 348.06 | C21H13ClO3  | [M-H]- | Lignans and Coumarins       | 3(2'-Chlorophenyl)-7-hydroxy-4-phenylcoumarin     |
| Lmhp011388 | 353.27 | 261.22 | 352.26 | C21H36O4    | [M+H]+ | Lipids                      | 2- $\alpha$ -Linolenoyl-glycerol                  |
| Lmhp011562 | 353.27 | 261.22 | 352.26 | C21H36O4    | [M+H]+ | Lipids                      | 1- $\alpha$ -Linolenoyl-glycerol                  |
| mws2108    | 353.09 | 191.05 | 354.10 | C16H18O9    | [M-H]- | Phenolic acids              | Cryptochlorogenic acid (4-O-Caffeoylquinic acid)* |
| HX1364     | 355.10 | 163.04 | 354.10 | C16H18O9    | [M+H]+ | Lignans and Coumarins       | isoscopoletin-glucoside                           |
| mws0178    | 353.09 | 191.01 | 354.10 | C16H18O9    | [M-H]- | Phenolic acids              | Chlorogenic acid (3-O-Caffeoylquinic acid)*       |
| pmp001283  | 355.28 | 337.27 | 354.28 | C21H38O4    | [M+H]+ | Lipids                      | 1-Monolinolein                                    |
| Lmhp112042 | 355.28 | 263.24 | 354.28 | C21H38O4    | [M+H]+ | Lipids                      | 1-Linoleoylglycerol                               |
| Lmhp012042 | 355.28 | 263.24 | 354.28 | C21H38O4    | [M+H]+ | Lipids                      | 2-Linoleoylglycerol                               |
| Zmhn002422 | 355.10 | 193.05 | 356.11 | C16H20O9    | [M-H]- | Phenolic acids              | 1-O-Feruloyl- $\beta$ -D-glucose                  |
| Lssp210123 | 357.13 | 137.06 | 356.13 | C20H20O6    | [M+H]+ | Others                      | $\alpha$ -Conidendrin                             |
| pmb0296    | 357.30 | 265.40 | 356.29 | C21H40O4    | [M+H]+ | Lipids                      | 1-Oleoyl-Sn-Glycerol                              |
| Lmsp004450 | 359.15 | 131.05 | 358.14 | C20H22O6    | [M+H]+ | Phenolic acids              | Dehydrodiconiferyl alcohol                        |
| mws0097    | 357.13 | 151.00 | 358.14 | C20H22O6    | [M-H]- | Lignans and Coumarins       | Pinoresinol                                       |
| MWS20190   | 361.09 | 346.07 | 360.09 | C18H16O8    | [M+H]+ | Flavonoids                  | 5,7,4'-trihydroxy-6,3',5'-trimethoxyisoflavone    |
| pmb3107    | 359.10 | 182.10 | 360.11 | C15H20O10   | [M-H]- | Phenolic acids              | Glucosyringic Acid                                |
| HX1369     | 361.16 | 189.09 | 360.16 | C20H24O6    | [M+H]+ | Lignans and Coumarins       | (-)-Lariciresinol                                 |

|            |        |        |        |              |        |                             |                                             |
|------------|--------|--------|--------|--------------|--------|-----------------------------|---------------------------------------------|
| pmb0964    | 366.20 | 204.10 | 365.17 | C16H23N5O5   | [M+H]+ | Nucleotides and derivatives | Isopentenyladenine-7-N-glucoside            |
| Lmgp003270 | 369.16 | 177.06 | 368.07 | C16H16O10    | [M+H]+ | Lignans and Coumarins       | Scopoletin-7-O-glucuronide                  |
| pma0104    | 369.12 | 207.10 | 368.09 | C20H16O7     | [M+H]+ | Lignans and Coumarins       | N-Sinapoylhydroxycoumarin                   |
| pmb0752    | 369.12 | 177.10 | 368.11 | C17H20O9     | [M+H]+ | Phenolic acids              | 3-O-Feruloylquinic acid                     |
| mws0179    | 367.10 | 190.90 | 368.11 | C17H20O9     | [M-H]- | Phenolic acids              | Chlorogenic acid methyl ester               |
| pmn001695  | 371.10 | 249.06 | 372.11 | C16H20O10    | [M-H]- | Phenolic acids              | Trihydroxycinnamoylquinic acid              |
| mws0055    | 373.13 | 343.09 | 372.12 | C20H20O7     | [M+H]+ | Flavonoids                  | 4',5,6,7,8-Pentamethoxyflavone              |
| pmb0108    | 375.20 | 137.10 | 374.10 | C19H18O8     | [M+H]+ | Phenolic acids              | Feruloyl syringic acid                      |
| Lmzn001983 | 375.13 | 135.05 | 376.14 | C16H24O10    | [M-H]- | Phenolic acids              | D-Threo-guaiacylglycerol-7-O-β-D-glucoside  |
| mws0232    | 377.15 | 243.00 | 376.14 | C17H20N4O6   | [M+H]+ | Others                      | Riboflavin (Vitamin B2)                     |
| pme3337    | 384.12 | 252.00 | 383.11 | C14H17N5O8   | [M+H]+ | Nucleotides and derivatives | Succinyladenosine                           |
| Lmjp003090 | 385.11 | 223.06 | 384.11 | C17H20O10    | [M+H]+ | Lignans and Coumarins       | Isofraxidin-7-O-glucoside                   |
| pmb2940    | 385.11 | 205.00 | 386.12 | C17H22O10    | [M-H]- | Phenolic acids              | 1-O-Glucosyl sinapate                       |
| pmn001423  | 385.19 | 223.13 | 386.19 | C19H30O8     | [M-H]- | Others                      | Roseoside                                   |
| Lmzn001582 | 387.17 | 207.10 | 388.17 | C18H28O9     | [M-H]- | Phenolic acids              | 5'-Glucosyloxyjasmanic acid                 |
| Lmwp011196 | 391.28 | 149.02 | 390.28 | C24H38O4     | [M+H]+ | Phenolic acids              | Bis(2-ethylhexyl)phthalate*                 |
| Lmmp010562 | 391.28 | 149.02 | 390.28 | C24H38O4     | [M+H]+ | Phenolic acids              | Diisooctyl Phthalate*                       |
| mws0043    | 403.14 | 373.10 | 402.13 | C21H22O8     | [M+H]+ | Flavonoids                  | 5,6,7,8,3',4'-Hexamethoxyflavone            |
| Cmjn004337 | 401.14 | 269.10 | 402.15 | C18H26O10    | [M-H]- | Phenolic acids              | Benzyl-(2"-O-xylosyl)glucoside              |
| pme3007    | 402.99 | 159.00 | 404.00 | C9H14N2O12P2 | [M-H]- | Nucleotides and derivatives | Uridine 5'-diphosphate                      |
| pmn001394  | 405.12 | 243.10 | 406.13 | C20H22O9     | [M-H]- | Others                      | 2,3,5,4'-Tetrahydroxystilbene-2-O-glucoside |
| pmd0152    | 409.24 | 153.00 | 410.24 | C19H39O7P    | [M-H]- | Lipids                      | LysoPA 16:0 (2n isomer)                     |
| pmd0153    | 409.24 | 153.00 | 410.24 | C19H39O7P    | [M-H]- | Lipids                      | LysoPA 16:0                                 |
| HJAP012    | 419.10 | 383.07 | 418.09 | C20H18O10    | [M+H]+ | Flavonoids                  | Luteolin-8-C-arabinoside                    |
| MWS20152   | 417.16 | 402.10 | 418.16 | C22H26O8     | [M-H]- | Lignans and Coumarins       | Syringaresinol                              |
| mws2523    | 421.08 | 241.10 | 422.08 | C12H23O14P   | [M-H]- | Others                      | Trehalose 6-phosphate                       |

|            |        |        |        |                        |                    |                             |                                                  |
|------------|--------|--------|--------|------------------------|--------------------|-----------------------------|--------------------------------------------------|
| Lmhp008337 | 426.26 | 285.24 | 425.25 | C19H40NO7P             | [M+H] <sup>+</sup> | Lipids                      | LysoPE 14:0(2n isomer)                           |
| pmb0864    | 426.26 | 285.24 | 425.25 | C19H40NO7P             | [M+H] <sup>+</sup> | Lipids                      | LysoPE 14:0                                      |
| pme2117    | 426.00 | 159.00 | 427.03 | C10H15N5O10P2          | [M-H] <sup>-</sup> | Nucleotides and derivatives | Adenosine 5'-diphosphate                         |
| pmp001248  | 428.19 | 369.11 | 428.17 | C20H30NO9 <sup>+</sup> | [M] <sup>+</sup>   | Alkaloids                   | Caffeoylcholine-4-O-glucoside                    |
| Cmbn007148 | 429.12 | 429.12 | 430.13 | C22H22O9               | [M-H] <sup>-</sup> | Lipids                      | 1-O-Feruloyl-3-O-caffeoylglycerol                |
| pme3504    | 431.13 | 269.08 | 430.13 | C22H22O9               | [M+H] <sup>+</sup> | Flavonoids                  | Formononetin-7-O-glycoside (Ononin)              |
| pmp000413  | 433.11 | 283.06 | 432.11 | C21H20O10              | [M+H] <sup>+</sup> | Flavonoids                  | Genistein-8-C-glucoside                          |
| Lmgn004731 | 433.11 | 271.06 | 432.11 | C21H20O10              | [M+H] <sup>+</sup> | Flavonoids                  | Genistein-7-O-galactoside                        |
| Lmdp003509 | 435.09 | 303.06 | 434.09 | C20H18O11              | [M+H] <sup>+</sup> | Flavonoids                  | Quercetin-3-O-xyloside*                          |
| mws2186    | 435.09 | 303.00 | 434.09 | C20H18O11              | [M+H] <sup>+</sup> | Flavonoids                  | Quercetin-3-O- $\alpha$ -L-arabinofuranoside*    |
| Cmzn005251 | 433.11 | 271.06 | 434.12 | C21H22O10              | [M-H] <sup>-</sup> | Phenolic acids              | 6-O-Caffeoylarbutin                              |
| HJN090     | 433.11 | 271.06 | 434.12 | C21H22O10              | [M-H] <sup>-</sup> | Flavonoids                  | Butin-7-O-glucoside                              |
| Lmhp008273 | 438.26 | 297.24 | 437.25 | C20H40NO7P             | [M+H] <sup>+</sup> | Lipids                      | LysoPE 15:1(2n isomer)                           |
| Lmhp008440 | 438.26 | 297.24 | 437.25 | C20H40NO7P             | [M+H] <sup>+</sup> | Lipids                      | LysoPE 15:1                                      |
| Lmhp009187 | 440.28 | 299.26 | 439.27 | C20H42NO7P             | [M+H] <sup>+</sup> | Lipids                      | LysoPE 15:0                                      |
| Lmhp008885 | 440.28 | 299.26 | 439.27 | C20H42NO7P             | [M+H] <sup>+</sup> | Lipids                      | LysoPE 15:0(2n isomer)                           |
| Hmcp002316 | 449.11 | 317.06 | 448.10 | C21H20O11              | [M+H] <sup>+</sup> | Flavonoids                  | Isorhamnetin-3-O-arabinoside                     |
| Xmyp005654 | 449.11 | 287.06 | 448.10 | C21H20O11              | [M+H] <sup>+</sup> | Flavonoids                  | Kaempferol-4'-O-glucoside*                       |
| MWSHY0104  | 449.11 | 287.06 | 448.10 | C21H20O11              | [M+H] <sup>+</sup> | Flavonoids                  | Luteolin-7-O-glucoside*                          |
| Lmsn003297 | 449.11 | 287.06 | 450.12 | C21H22O11              | [M-H] <sup>-</sup> | Flavonoids                  | 3,4,2',4',6'-Pentahydroxychalcone-4'-O-glucoside |
| Lmmn004625 | 449.11 | 287.06 | 450.12 | C21H22O11              | [M-H] <sup>-</sup> | Flavonoids                  | Dihydrokaempferol-7-O-glucoside*                 |
| MWS20145   | 451.12 | 289.07 | 450.12 | C21H22O11              | [M+H] <sup>+</sup> | Flavonoids                  | Eriodictyol-7-O-glucoside*                       |
| Cmcp003975 | 451.12 | 289.07 | 450.12 | C21H22O11              | [M+H] <sup>+</sup> | Flavonoids                  | Okanin-4'-O-glucoside(Marcin)*                   |
| HJN086     | 449.11 | 287.06 | 450.12 | C21H22O11              | [M-H] <sup>-</sup> | Flavonoids                  | Eriodictyol-3'-O-glucoside*                      |
| Jmgn004021 | 449.11 | 269.05 | 450.12 | C21H22O11              | [M-H] <sup>-</sup> | Flavonoids                  | 6-C-Glucosyl-2-Hydroxynaringenin                 |
| MWSmce674  | 451.36 | 89.06  | 450.35 | C31H46O2               | [M+H] <sup>+</sup> | Others                      | Phylloquinone (Vitamin K1)                       |

|             |        |        |        |             |                    |                             |                                                          |
|-------------|--------|--------|--------|-------------|--------------------|-----------------------------|----------------------------------------------------------|
| Lmhp009034  | 452.28 | 311.26 | 451.27 | C21H42NO7P  | [M+H] <sup>+</sup> | Lipids                      | LysoPE 16:1                                              |
| Lmhp008763  | 452.28 | 311.26 | 451.27 | C21H42NO7P  | [M+H] <sup>+</sup> | Lipids                      | LysoPE 16:1(2n isomer)                                   |
| Hmpn005101  | 451.12 | 289.07 | 452.13 | C21H24O11   | [M-H] <sup>-</sup> | Flavonoids                  | Sieboldin                                                |
| HJN041      | 451.12 | 289.07 | 452.13 | C21H24O11   | [M-H] <sup>-</sup> | Flavonoids                  | Epicatechin glucoside                                    |
| Zmhn001257  | 451.12 | 289.07 | 452.13 | C21H24O11   | [M-H] <sup>-</sup> | Flavonoids                  | Catechin-5-O-glucoside                                   |
| pmd0160     | 454.29 | 313.27 | 453.29 | C21H44NO7P  | [M+H] <sup>+</sup> | Lipids                      | LysoPE 16:0(2n isomer)                                   |
| pmb0876     | 454.29 | 313.27 | 453.29 | C21H44NO7P  | [M+H] <sup>+</sup> | Lipids                      | LysoPE 16:0                                              |
| MWS5083     | 455.10 | 96.97  | 456.11 | C17H21N4O9P | [M-H] <sup>-</sup> | Nucleotides and derivatives | Flavin Single Nucleotide(FMN)                            |
| Lmhn004756  | 455.10 | 233.04 | 456.11 | C23H20O10   | [M-H] <sup>-</sup> | Phenolic acids              | Cinnamoylferuloyltartaric acid                           |
| Zmjn014062  | 455.35 | 455.35 | 456.36 | C30H48O3    | [M-H] <sup>-</sup> | Terpenoids                  | (23S)-3 $\beta$ -hydroxydammar-21-oic acid 21,23-lactone |
| pmb2654     | 460.10 | 117.90 | 461.15 | C19H27NO12  | [M-H] <sup>-</sup> | Phenolic acids              | Anthranilate-1-O-Sophoroside                             |
| Lmzn001894  | 461.07 | 285.04 | 462.08 | C21H18O12   | [M-H] <sup>-</sup> | Flavonoids                  | Kaempferol-3-O-glucuronide                               |
| Lmhn002321  | 461.07 | 167.04 | 462.08 | C21H18O12   | [M-H] <sup>-</sup> | Phenolic acids              | Vnilloylcaffeoyltartaric acid                            |
| Lmjnp003655 | 463.12 | 301.08 | 462.12 | C22H22O11   | [M+H] <sup>+</sup> | Flavonoids                  | 6-C-MethylKaempferol-3-glucoside*                        |
| Cmyp002064  | 463.12 | 301.08 | 462.12 | C22H22O11   | [M+H] <sup>+</sup> | Flavonoids                  | Yuanhuanin*                                              |
| Hmmp004965  | 463.12 | 301.07 | 462.12 | C22H22O11   | [M+H] <sup>+</sup> | Flavonoids                  | Diosmetin-7-O-glucoside*                                 |
| MWSslk013   | 463.12 | 301.09 | 462.12 | C22H22O11   | [M+H] <sup>+</sup> | Flavonoids                  | Tectoridin*                                              |
| pmb3012     | 461.11 | 299.20 | 462.12 | C22H22O11   | [M-H] <sup>-</sup> | Flavonoids                  | Chrysoeriol-7-O-glucoside                                |
| pmp000579   | 463.12 | 301.07 | 462.12 | C22H22O11   | [M+H] <sup>+</sup> | Flavonoids                  | Diosmetin-7-O-galactoside*                               |
| MWSHY0195   | 463.12 | 301.08 | 462.12 | C22H22O11   | [M+H] <sup>+</sup> | Flavonoids                  | Hispidulin-7-O-Glucoside*                                |
| pmp001309   | 465.10 | 303.10 | 464.10 | C21H20O12   | [M+H] <sup>+</sup> | Flavonoids                  | 6-Hydroxykaempferol-7-O-glucoside                        |
| Hmcn001884  | 463.09 | 301.03 | 464.10 | C21H20O12   | [M-H] <sup>-</sup> | Flavonoids                  | 6-Hydroxyluteolin 5-glucoside                            |
| MWSHY0046   | 465.10 | 303.05 | 464.10 | C21H20O12   | [M+H] <sup>+</sup> | Flavonoids                  | Quercetin-3-O-glucoside*                                 |
| Lmdp003286  | 465.10 | 303.06 | 464.10 | C21H20O12   | [M+H] <sup>+</sup> | Flavonoids                  | Isohyperoside*                                           |
| MWSHY0113   | 465.10 | 303.06 | 464.10 | C21H20O12   | [M+H] <sup>+</sup> | Flavonoids                  | Quercetin-3-O-galactoside*                               |
| mws1329     | 463.09 | 301.03 | 464.10 | C21H20O12   | [M-H] <sup>-</sup> | Flavonoids                  | Quercetin-7-O-glucoside                                  |

|             |        |        |        |            |                    |            |                                      |
|-------------|--------|--------|--------|------------|--------------------|------------|--------------------------------------|
| Smgp004575  | 465.10 | 303.05 | 464.10 | C21H20O12  | [M+H] <sup>+</sup> | Flavonoids | Quercetin-5-O- $\beta$ -D-glucoside* |
| Lmhp009464  | 466.29 | 325.27 | 465.29 | C22H44NO7P | [M+H] <sup>+</sup> | Lipids     | LysoPE 17:1(2n isomer)               |
| Lmhp009769  | 466.29 | 325.27 | 465.29 | C22H44NO7P | [M+H] <sup>+</sup> | Lipids     | LysoPE 17:1                          |
| Xmsn002700  | 465.13 | 303.06 | 466.11 | C21H22O12  | [M-H] <sup>-</sup> | Flavonoids | Taxifolin-3'-O-glucoside             |
| pmd0130     | 468.31 | 184.07 | 467.30 | C22H46NO7P | [M+H] <sup>+</sup> | Lipids     | LysoPC 14:0                          |
| Qmgp102003  | 468.31 | 184.07 | 467.30 | C29H41NO4  | [M+H] <sup>+</sup> | Alkaloids  | O-Acetylgerveine                     |
| pmb1912     | 474.17 | 327.00 | 473.17 | C20H23N7O7 | [M+H] <sup>+</sup> | Alkaloids  | 10-Formyltetrahydrofolic Acid        |
| Lmhp008233  | 474.26 | 333.24 | 473.25 | C23H40NO7P | [M+H] <sup>+</sup> | Lipids     | LysoPE 18:4                          |
| Lmhp008801  | 476.28 | 335.26 | 475.27 | C23H42NO7P | [M+H] <sup>+</sup> | Lipids     | LysoPE 18:3                          |
| Lmhp008589  | 476.28 | 335.26 | 475.27 | C23H42NO7P | [M+H] <sup>+</sup> | Lipids     | LysoPE 18:3(2n isomer)               |
| pmb0881     | 478.29 | 337.27 | 477.29 | C23H44NO7P | [M+H] <sup>+</sup> | Lipids     | LysoPE 18:2                          |
| pmb0874     | 478.29 | 337.27 | 477.29 | C23H44NO7P | [M+H] <sup>+</sup> | Lipids     | LysoPE 18:2(2n isomer)               |
| Lmmp003783  | 479.09 | 303.05 | 478.08 | C21H18O13  | [M+H] <sup>+</sup> | Flavonoids | Quercetin-3-O-glucuronide            |
| Lmqp003647  | 479.08 | 303.05 | 478.08 | C21H18O13  | [M+H] <sup>+</sup> | Flavonoids | Herbactin-3-O-glucuronide            |
| Lmjip003295 | 479.12 | 317.07 | 478.11 | C22H22O12  | [M+H] <sup>+</sup> | Flavonoids | 6-Methoxykaempferol-3-O-glucoside*   |
| Lmcp003788  | 479.12 | 317.06 | 478.11 | C22H22O12  | [M+H] <sup>+</sup> | Flavonoids | Isotamarixin                         |
| Hmcp002207  | 479.12 | 317.06 | 478.11 | C22H22O12  | [M+H] <sup>+</sup> | Flavonoids | Isorhamnetin-7-O-glucoside*          |
| Hmcp002148  | 479.12 | 317.06 | 478.11 | C22H22O12  | [M+H] <sup>+</sup> | Flavonoids | Nepetin-7-O-alloside*                |
| Hmcp002036  | 479.12 | 317.06 | 478.11 | C22H22O12  | [M+H] <sup>+</sup> | Flavonoids | Nepetin-7-O-glucoside*               |
| mws0289     | 480.31 | 339.29 | 479.30 | C23H46NO7P | [M+H] <sup>+</sup> | Lipids     | LysoPE 18:1                          |
| pmb2260     | 480.31 | 184.07 | 479.30 | C23H46NO7P | [M+H] <sup>+</sup> | Lipids     | LysoPC 15:1                          |
| pmb0856     | 480.31 | 339.29 | 479.30 | C23H46NO7P | [M+H] <sup>+</sup> | Lipids     | LysoPE 18:1(2n isomer)               |
| pmb0880     | 482.32 | 341.31 | 481.32 | C23H48NO7P | [M+H] <sup>+</sup> | Lipids     | LysoPE 18:0(2n isomer)               |
| Lmhp009129  | 482.32 | 184.07 | 481.32 | C23H48NO7P | [M+H] <sup>+</sup> | Lipids     | LysoPC 15:0(2n isomer)               |
| pmb0883     | 482.32 | 341.31 | 481.32 | C23H48NO7P | [M+H] <sup>+</sup> | Lipids     | LysoPE 18:0                          |
| pmb2319     | 482.32 | 184.07 | 481.32 | C23H48NO7P | [M+H] <sup>+</sup> | Lipids     | LysoPC 15:0                          |



|             |        |        |        |            |         |                |                                                               |
|-------------|--------|--------|--------|------------|---------|----------------|---------------------------------------------------------------|
| Lmsn011830  | 485.33 | 485.33 | 486.34 | C30H46O5   | [M-H]-  | Terpenoids     | 2 $\alpha$ ,19 $\alpha$ -Dihydroxy-3-oxours-12-en-28-oic acid |
| Lmmn003398  | 489.11 | 285.04 | 490.11 | C23H22O12  | [M-H]-  | Flavonoids     | Kaempferol-3-O-(6''-acetyl)glucoside                          |
| pmb0863     | 492.31 | 184.07 | 491.30 | C24H46NO7P | [M+H]+  | Lipids         | LysoPC 16:2(2n isomer)                                        |
| pmp001164   | 493.13 | 316.10 | 492.13 | C23H24O12  | [M+H]+  | Flavonoids     | Iristectorin B                                                |
| pmb0736     | 493.13 | 331.08 | 492.13 | C23H24O12  | [M+H]+  | Flavonoids     | Tricin-7-O-Glucoside*                                         |
| Lmgrp003546 | 493.13 | 331.08 | 492.13 | C23H24O12  | [M+H]+  | Flavonoids     | 4',5'-Dihydroxy-6,8-dimethoxyisoflavone-7-O-galactoside       |
| Hmgrp002238 | 493.14 | 331.08 | 492.13 | C23H24O12  | [M+H]+  | Flavonoids     | Jaceosidin-7-O-Glucoside*                                     |
| pmb0790     | 494.19 | 332.50 | 493.18 | C20H31NO13 | [M+H]+  | Others         | Pyridoxine-5'-O-diglucoside                                   |
| pmp001270   | 494.32 | 184.07 | 493.32 | C24H48NO7P | [M+H]+  | Lipids         | LysoPC 16:1                                                   |
| Lmhp008833  | 494.32 | 184.07 | 493.32 | C24H48NO7P | [M+H]+  | Lipids         | LysoPC 16:1(2n isomer)                                        |
| Lmjpb003231 | 495.11 | 333.07 | 494.11 | C22H22O13  | [M+H]+  | Flavonoids     | Patuletin-3-O-glucoside                                       |
| Lmtn002997  | 493.10 | 331.05 | 494.11 | C22H22O13  | [M-H]-  | Flavonoids     | Mearnsetin-3-O-glucoside                                      |
| pmd0132     | 496.34 | 184.07 | 495.33 | C24H50NO7P | [M+H]+  | Lipids         | LysoPC 16:0(2n isomer)                                        |
| pmb0855     | 496.34 | 184.07 | 495.33 | C24H50NO7P | [M+H]+  | Lipids         | LysoPC 16:0                                                   |
| mad2394     | 501.10 | 337.05 | 502.11 | C24H22O12  | [M-H]-  | Phenolic acids | Sinapoyl-p-coumaroyltartaric acid                             |
| Lmhp009802  | 504.31 | 363.29 | 503.30 | C25H46NO7P | [M+H]+  | Lipids         | LysoPE 20:3(2n isomer)                                        |
| Lmhp010040  | 504.31 | 363.29 | 503.30 | C25H46NO7P | [M+H]+  | Lipids         | LysoPE 20:3                                                   |
| pmn001642   | 503.08 | 459.10 | 504.09 | C23H20O13  | [M-H]-  | Flavonoids     | Kaempferol-3-O-(2''-O-acetyl)glucuronide                      |
| mws1589     | 503.16 | 179.00 | 504.17 | C18H32O16  | [M-H]-  | Others         | D-Panose                                                      |
| MWS0442     | 527.16 | 365.10 | 504.17 | C18H32O16  | [M+Na]+ | Others         | Maltotriose                                                   |
| Lmhp010514  | 506.32 | 365.31 | 505.32 | C25H48NO7P | [M+H]+  | Lipids         | LysoPE 20:2(2n isomer)                                        |
| Lmhp008718  | 506.32 | 184.07 | 505.32 | C25H48NO7P | [M+H]+  | Lipids         | LysoPC 17:2                                                   |
| Lmhp010757  | 506.32 | 365.31 | 505.32 | C25H48NO7P | [M+H]+  | Lipids         | LysoPE 20:2                                                   |
| Hmln002199  | 505.10 | 300.03 | 506.11 | C23H22O13  | [M-H]-  | Flavonoids     | Quercetin-3-O-(6''-O-acetyl)galactoside                       |
| Lmhp009590  | 508.34 | 184.07 | 507.33 | C25H50NO7P | [M+H]+  | Lipids         | LysoPC 17:1                                                   |
| Hmcp002187  | 509.13 | 347.07 | 508.12 | C23H24O13  | [M+H]+  | Flavonoids     | Limocitrin-3-O-galactoside*                                   |

|             |        |        |        |            |                      |                       |                                                           |
|-------------|--------|--------|--------|------------|----------------------|-----------------------|-----------------------------------------------------------|
| Zmgrp004436 | 509.13 | 347.08 | 508.12 | C23H24O13  | [M+H] <sup>+</sup>   | Flavonoids            | Okanin-4'-(6"-O-acetyl)glucoside*                         |
|             |        |        |        |            |                      |                       | 5,6,3',4'-Tetrahydroxy-3,7-dimethoxyflavone-6-O-glucoside |
| Zmjp004852  | 509.13 | 347.08 | 508.12 | C23H24O13  | [M+H] <sup>+</sup>   | Flavonoids            | *                                                         |
| HJAP006     | 509.13 | 347.08 | 508.12 | C23H24O13  | [M+H] <sup>+</sup>   | Flavonoids            | Syringetin-7-O-glucoside*                                 |
| pmb2406     | 510.36 | 184.07 | 509.35 | C25H52NO7P | [M+H] <sup>+</sup>   | Lipids                | LysoPC 17:0                                               |
| Lmhp010515  | 510.36 | 184.07 | 509.35 | C25H52NO7P | [M+H] <sup>+</sup>   | Lipids                | LysoPC 17:0(2n isomer)                                    |
| Lmgrp004518 | 531.15 | 177.05 | 512.13 | C26H24O11  | [M+H] <sup>+</sup>   | Phenolic acids        | CaffeoylferuloylQuinic acid                               |
| Lmhp009773  | 515.32 | 261.22 | 514.31 | C27H46O9   | [M+H] <sup>+</sup>   | Lipids                | 1- $\alpha$ -Linolenoyl-glycerol-3-O-glucoside            |
| Hmqp006235  | 516.30 | 184.07 | 515.30 | C26H46NO7P | [M+H] <sup>+</sup>   | Lipids                | LysoPC 18:4                                               |
| MWSmce328   | 517.13 | 163.04 | 516.13 | C25H24O12  | [M+H] <sup>+</sup>   | Phenolic acids        | Isochlorogenic acid C                                     |
| Li512115    | 515.12 | 353.09 | 516.13 | C25H24O12  | [M-H] <sup>-</sup>   | Phenolic acids        | Isochlorogenic acid B                                     |
| Wmzn002116  | 515.12 | 353.09 | 516.13 | C25H24O12  | [M-H] <sup>-</sup>   | Phenolic acids        | 3,5-Dicaffeoylquinic acid                                 |
| mws1584     | 515.12 | 191.05 | 516.13 | C25H24O12  | [M-H] <sup>-</sup>   | Phenolic acids        | 1,3-O-Dicaffeoylquinic Acid                               |
| Lmhp010573  | 517.34 | 263.24 | 516.33 | C27H48O9   | [M+H] <sup>+</sup>   | Lipids                | 1-Linoleoylglycerol-3-O-glucoside                         |
| pmb0854     | 518.32 | 184.07 | 517.32 | C26H48NO7P | [M+H] <sup>+</sup>   | Lipids                | LysoPC 18:3                                               |
| pmb0865     | 518.32 | 184.07 | 517.32 | C26H48NO7P | [M+H] <sup>+</sup>   | Lipids                | LysoPC 18:3(2n isomer)                                    |
| pmp001273   | 520.34 | 184.07 | 519.33 | C26H50NO7P | [M+H] <sup>+</sup>   | Lipids                | LysoPC 18:2                                               |
| pmp001251   | 520.34 | 184.07 | 519.33 | C26H50NO7P | [M+H] <sup>+</sup>   | Lipids                | LysoPC 18:2(2n isomer)                                    |
| pmn001644   | 519.08 | 300.00 | 520.09 | C23H20O14  | [M-H] <sup>-</sup>   | Flavonoids            | Quercetin-3-O-(2"-O-acetyl)glucuronide                    |
| pmp000682   | 538.22 | 359.14 | 520.17 | C26H32O11  | [M+NH4] <sup>+</sup> | Lignans and Coumarins | Matairesinol-4'-O-glucoside                               |
| Lmsp003655  | 521.20 | 131.05 | 520.19 | C26H32O11  | [M+H] <sup>+</sup>   | Phenolic acids        | Dehydrodiconiferyl alcohol-gamma'-O-glucoside*            |
| Cmsp003083  | 521.20 | 131.05 | 520.19 | C26H32O11  | [M+H] <sup>+</sup>   | Others                | Dehydrodiconiferyl alcohol-4-O-glucoside*                 |
| pmp001281   | 522.36 | 184.07 | 521.35 | C26H52NO7P | [M+H] <sup>+</sup>   | Lipids                | LysoPC 18:1                                               |
| Lmhp010190  | 522.36 | 184.07 | 521.35 | C26H52NO7P | [M+H] <sup>+</sup>   | Lipids                | LysoPC 18:1(2n isomer)                                    |
| pmn001710   | 521.13 | 359.08 | 522.14 | C24H26O13  | [M-H] <sup>-</sup>   | Phenolic acids        | Rosmarinic acid-3'-O-glucoside                            |
| Zmgrp005070 | 523.14 | 361.09 | 522.14 | C24H26O13  | [M+H] <sup>+</sup>   | Flavonoids            | Centaurein                                                |

|             |        |        |        |               |        |                             |                                                  |
|-------------|--------|--------|--------|---------------|--------|-----------------------------|--------------------------------------------------|
| Lmmn002274  | 521.20 | 359.15 | 522.21 | C26H34O11     | [M-H]- | Lignans and Coumarins       | Isolariciresinol-9'-O-glucoside*                 |
| Lmyn003971  | 521.20 | 359.15 | 522.21 | C26H34O11     | [M-H]- | Lignans and Coumarins       | Dihydrodehydrodiconiferyl alcohol-4-O-glucoside* |
| pmd0136     | 524.37 | 184.07 | 523.36 | C26H54NO7P    | [M+H]+ | Lipids                      | LysoPC 18:0(2n isomer)                           |
| mws0126     | 524.37 | 184.07 | 523.36 | C26H54NO7P    | [M+H]+ | Lipids                      | LysoPC 18:0                                      |
| Lmtn003096  | 523.21 | 361.14 | 524.23 | C26H36O11     | [M-H]- | Lignans and Coumarins       | Secoisolariciresinol 4-O-glucoside               |
| Lmjp003731  | 531.15 | 177.06 | 530.14 | C26H26O12     | [M+H]+ | Phenolic acids              | 3,4-O-Dicaffeoylquinic Acid Methyl Ester         |
| Lmhp008924  | 532.34 | 184.07 | 531.33 | C27H50NO7P    | [M+H]+ | Lipids                      | LysoPC 19:3                                      |
| pmp000587   | 535.11 | 449.10 | 534.10 | C24H22O14     | [M+H]+ | Flavonoids                  | Luteolin-7-O-(6"-malonyl)glucoside               |
| Lmdp004892  | 535.11 | 287.05 | 534.10 | C24H22O14     | [M+H]+ | Flavonoids                  | Kaempferol-3-O-(6"-malonyl)galactoside           |
| Zmfn000481  | 535.04 | 323.03 | 536.04 | C14H22N2O16P2 | [M-H]- | Nucleotides and derivatives | Uridine-5'-Diphosphate-D-Xylose                  |
| Cmxxp004324 | 537.12 | 289.07 | 536.12 | C24H24O14     | [M+H]+ | Flavonoids                  | Okanin-4'-O-(6"-O-malonyl)glucoside              |
| Lmdn001925  | 537.20 | 375.15 | 538.21 | C26H34O12     | [M-H]- | Lignans and Coumarins       | Olivil-4'-O-glucoside                            |
| pmc0960     | 544.34 | 184.07 | 543.33 | C28H50NO7P    | [M+H]+ | Lipids                      | LysoPC 20:4                                      |
| Lmhp009890  | 546.36 | 184.07 | 545.35 | C28H52NO7P    | [M+H]+ | Lipids                      | LysoPC 20:3                                      |
| pmd0146     | 548.37 | 184.07 | 547.36 | C28H54NO7P    | [M+H]+ | Lipids                      | LysoPC 20:2(2n isomer)                           |
| pmd0147     | 548.37 | 184.07 | 547.36 | C28H54NO7P    | [M+H]+ | Lipids                      | LysoPC 20:2                                      |
| pmb0608     | 549.12 | 301.40 | 548.12 | C25H24O14     | [M+H]+ | Flavonoids                  | Chrysoeriol-7-O-(6"-malonyl)glucoside            |
| pmp000588   | 549.12 | 463.12 | 548.12 | C25H24O14     | [M+H]+ | Flavonoids                  | Diosmetin-7-O-(6"-malonyl)glucoside              |
| pmp000589   | 551.10 | 303.05 | 550.10 | C24H22O15     | [M+H]+ | Flavonoids                  | Quercetin-7-O-(6"-malonyl)glucoside              |
| Lmmn002260  | 551.21 | 389.17 | 552.22 | C27H36O12     | [M-H]- | Lignans and Coumarins       | 5'-Methoxyisolariciresinol-9'-O-glucoside        |
| pma0702     | 558.28 | 207.07 | 557.27 | C29H39N3O8    | [M+H]+ | Alkaloids                   | N1,N8-Bis(sinapoyl)spermidine                    |
| Lmhn003802  | 561.13 | 337.06 | 562.13 | C26H26O14     | [M-H]- | Phenolic acids              | Sinapoylsinapoyltartaric acid                    |
| Rfmb25702   | 561.20 | 357.13 | 562.21 | C28H34O12     | [M-H]- | Lignans and Coumarins       | Pinoresinol-4-O-(6"-acetyl)glucoside             |
| HJAP064     | 565.12 | 317.08 | 564.09 | C25H24O15     | [M+H]+ | Flavonoids                  | Isorhamnetin-3-O-(6"-malonyl)glucoside*          |
| Zmhp005139  | 565.12 | 317.07 | 564.11 | C25H24O15     | [M+H]+ | Flavonoids                  | Tamarixetin-3-O-(6"-malonyl)glucoside*           |
| pmb2922     | 565.05 | 323.10 | 566.06 | C15H24N2O17P2 | [M-H]- | Nucleotides and derivatives | Uridine 5'-diphospho-D-glucose                   |

|            |        |        |        |               |                    |                             |                                                            |
|------------|--------|--------|--------|---------------|--------------------|-----------------------------|------------------------------------------------------------|
| Zmxp005470 | 579.13 | 331.08 | 578.13 | C26H26O15     | [M+H] <sup>+</sup> | Flavonoids                  | Tricin-7-O-(6"-O-malonyl)glucoside                         |
| Lmcp004474 | 579.17 | 271.06 | 578.16 | C27H30O14     | [M+H] <sup>+</sup> | Flavonoids                  | Genistein-7-O-galactoside-rhamnose*                        |
| Hmcp001769 | 581.15 | 303.04 | 580.14 | C26H28O15     | [M+H] <sup>+</sup> | Flavonoids                  | Quercetin-3-O-rhamnosyl(1→2)arabinoside                    |
| Zmhn001446 | 579.21 | 417.16 | 580.22 | C28H36O13     | [M-H] <sup>-</sup> | Lignans and Coumarins       | Syringaresinol-4'-O-glucoside                              |
| pmb0492    | 584.28 | 325.00 | 583.27 | C34H37N3O6    | [M+H] <sup>+</sup> | Alkaloids                   | N',N'',N'''-p-Coumaroyl-cinnamoyl-caffeoyl spermidine      |
| Rfmb056    | 591.21 | 387.14 | 592.22 | C29H36O13     | [M-H] <sup>-</sup> | Lignans and Coumarins       | Medioresinol-4'-O-(6"-acetyl)glucoside                     |
| MWSHY0061  | 595.16 | 287.06 | 594.16 | C27H30O15     | [M+H] <sup>+</sup> | Flavonoids                  | Kaempferol-3-O-neohesperidoside*                           |
| Lmsn002815 | 593.15 | 285.04 | 594.16 | C27H30O15     | [M-H] <sup>-</sup> | Flavonoids                  | Kaempferol-3-O-rutinoside                                  |
| pmp001106  | 595.17 | 577.16 | 594.16 | C27H30O15     | [M+H] <sup>+</sup> | Flavonoids                  | Vitexin-2"-O-glucoside                                     |
| MWSHY0080  | 595.17 | 287.06 | 594.16 | C27H30O15     | [M+H] <sup>+</sup> | Flavonoids                  | Luteolin-7-O-neohesperidoside*                             |
| Lmsp004670 | 595.17 | 287.06 | 594.16 | C27H30O15     | [M+H] <sup>+</sup> | Flavonoids                  | Kaempferol-3-O-glucoside-7-O-rhamnoside*                   |
| mws1073    | 595.17 | 457.20 | 594.16 | C27H30O15     | [M+H] <sup>+</sup> | Flavonoids                  | Apigenin-6,8-di-C-glucoside (Vicenin-2)                    |
| Lmjp002596 | 597.14 | 303.05 | 596.14 | C26H28O16     | [M+H] <sup>+</sup> | Flavonoids                  | Quercetin-3-O-sambubioside                                 |
| Lmmp000897 | 611.14 | 287.05 | 610.13 | C30H26O14     | [M+H] <sup>+</sup> | Flavonoids                  | Galocatechin-(4 $\alpha$ →8)-galocatechin                  |
| pmn001583  | 609.15 | 300.00 | 610.15 | C27H30O16     | [M-H] <sup>-</sup> | Flavonoids                  | Quercetin-3-O-robinobioside                                |
| Lmsp004166 | 611.16 | 303.05 | 610.15 | C27H30O16     | [M+H] <sup>+</sup> | Flavonoids                  | Quercetin-3-O-glucoside-7-O-rhamnoside                     |
| pmb0665    | 611.16 | 465.10 | 610.15 | C27H30O16     | [M+H] <sup>+</sup> | Flavonoids                  | Orientin-7-O-glucoside                                     |
| mws0059    | 609.15 | 301.00 | 610.15 | C27H30O16     | [M-H] <sup>-</sup> | Flavonoids                  | Quercetin-3-O-rutinoside (Rutin)                           |
| pme0001    | 609.18 | 301.00 | 610.19 | C28H34O15     | [M-H] <sup>-</sup> | Flavonoids                  | 3',5,7-Trihydroxy-4'-Methoxyflavanone-7-O-neohesperidoside |
| mws4134    | 611.14 | 306.08 | 612.15 | C20H32N6O12S2 | [M-H] <sup>-</sup> | Amino acids and derivatives | Oxiglutatione                                              |
| Cmxp003531 | 613.18 | 289.07 | 612.17 | C27H32O16     | [M+H] <sup>+</sup> | Flavonoids                  | Okanin-4'-O-gentiobioside                                  |
| XLn05122   | 615.14 | 191.06 | 616.14 | C29H28O15     | [M-H] <sup>-</sup> | Phenolic acids              | 1,4-O-dicaffeoyl-3-O-succinoyl-quinic acid*                |
| XLn05515   | 615.14 | 191.06 | 616.14 | C29H28O15     | [M-H] <sup>-</sup> | Phenolic acids              | 1,5-O-dicaffeoyl-3-O-succinoyl-quinic acid*                |
| Rfmb26201  | 621.22 | 417.16 | 622.23 | C30H38O14     | [M-H] <sup>-</sup> | Lignans and Coumarins       | Syringaresinol-4'-O-(6"-acetyl)glucoside                   |
| Zmxp002867 | 625.17 | 301.07 | 624.17 | C28H32O16     | [M+H] <sup>+</sup> | Flavonoids                  | Chrysoeriol-5,7-di-O-glucoside                             |

|            |        |        |        |           |        |                |                                                           |
|------------|--------|--------|--------|-----------|--------|----------------|-----------------------------------------------------------|
| HJN051     | 623.16 | 315.05 | 624.17 | C28H32O16 | [M-H]- | Flavonoids     | Tamarixetin-3-O-rutinoside                                |
| Lmhp003217 | 625.17 | 317.06 | 624.17 | C28H32O16 | [M+H]+ | Flavonoids     | 2'-Hydroxy,5-methoxyGenistein-O-rhamnosyl-glucoside*      |
| Lmmp002463 | 625.18 | 317.07 | 624.17 | C28H32O16 | [M+H]+ | Flavonoids     | Sexangularetin-3-O-glucoside-7-O-rhamnoside*              |
| MWSHY0064  | 625.17 | 317.07 | 624.17 | C28H32O16 | [M+H]+ | Flavonoids     | Isorhamnetin-3-O-neohesperidoside*                        |
| Lmsp004721 | 625.18 | 317.07 | 624.17 | C28H32O16 | [M+H]+ | Flavonoids     | Tamarixetin-3-O-glucoside-7-O-rhamnoside*                 |
| Lmnp002584 | 625.18 | 463.13 | 624.17 | C28H32O16 | [M+H]+ | Flavonoids     | Hispidulin-8-C-(2"-O-glucosyl)glucoside*                  |
| HJAP026    | 625.18 | 463.13 | 624.17 | C28H32O16 | [M+H]+ | Flavonoids     | Chrysoeriol-6-C-glucoside-4'-O-glucoside*                 |
| Hmcp001944 | 625.21 | 163.03 | 624.21 | C29H36O15 | [M+H]+ | Phenolic acids | Isoacteoside                                              |
| Zmdp003457 | 627.16 | 319.05 | 626.15 | C27H30O17 | [M+H]+ | Flavonoids     | Myricetin-3-O-galactoside-3'-O-rhamnoside*                |
| pmp001310  | 627.16 | 303.10 | 626.15 | C27H30O17 | [M+H]+ | Flavonoids     | 6-Hydroxykaempferol-3,6-O-Diglucoside*                    |
| MWSHY0162  | 627.16 | 303.06 | 626.15 | C27H30O17 | [M+H]+ | Flavonoids     | Quercetin-3-O-sophoroside (Baimaside)*                    |
| Lmsp003729 | 627.16 | 319.05 | 626.15 | C27H30O17 | [M+H]+ | Flavonoids     | Myricetin-3-O-rutinoside*                                 |
| pmp000596  | 627.16 | 465.10 | 626.15 | C27H30O17 | [M+H]+ | Flavonoids     | Quercetin-3-O-(2"-O-galactosyl)glucoside                  |
| Zmcp002666 | 627.14 | 303.05 | 626.15 | C27H30O17 | [M+H]+ | Flavonoids     | Quercetin-3,7-Di-O-glucoside                              |
| HJN038     | 631.10 | 317.04 | 632.10 | C28H24O17 | [M-H]- | Flavonoids     | Myricetin-3-O-(6"-galloyl)glucoside                       |
| XLn05042   | 631.14 | 469.11 | 632.14 | C29H28O16 | [M-H]- | Phenolic acids | 1,4-O-dicaffeoyl-3-O-maloyl-quinic acid*                  |
| XLn04840   | 631.14 | 469.11 | 632.14 | C29H28O16 | [M-H]- | Phenolic acids | 1,5-O-dicaffeoyl-3-O-maloyl-quinic acid*                  |
| Lmmp002560 | 641.13 | 303.05 | 640.13 | C27H28O18 | [M+H]+ | Flavonoids     | Quercetin-3-O-(2"-O-glucosyl)glucuronide                  |
| Hmcp001578 | 641.17 | 479.11 | 640.16 | C28H32O17 | [M+H]+ | Flavonoids     | Isorhamnetin-3,7-O-diglucoside                            |
| Lmsp004749 | 655.19 | 347.08 | 654.18 | C29H34O17 | [M+H]+ | Flavonoids     | Syringetin-3-O-rutinoside                                 |
| Lmcp003803 | 655.19 | 331.08 | 654.18 | C29H34O17 | [M+H]+ | Flavonoids     | 5,7,4'-Trihydroxy-6,8-dimethoxyisoflavone-7-O-galactoside |
| pmb0713    | 655.19 | 331.08 | 654.18 | C29H34O17 | [M+H]+ | Flavonoids     | -rhamnose                                                 |
| XLn05373   | 659.17 | 497.13 | 660.17 | C31H32O16 | [M-H]- | Phenolic acids | Tricin-7-O-(2"-O-glucosyl)glucoside*                      |
| mws4163    | 665.21 | 485.30 | 666.22 | C24H42O21 | [M-H]- | Others         | 1,5-O-dicaffeoyl-3-O-dimethylmalyl-quinic acid            |
| mws1593    | 665.21 | 161.00 | 666.22 | C24H42O21 | [M-H]- | Others         | Nystose                                                   |
|            |        |        |        |           |        |                | D-Maltotetraose                                           |

|             |        |        |        |               |        |                             |                                                          |
|-------------|--------|--------|--------|---------------|--------|-----------------------------|----------------------------------------------------------|
| Lmqn000213  | 665.21 | 341.11 | 666.22 | C24H42O21     | [M-H]- | Others                      | Stachyose                                                |
| Lm xp010913 | 676.45 | 184.08 | 675.45 | C35H66NO9P    | [M+H]+ | Lipids                      | 1-(9Z-Octadecenoyl)-2-sn-glycero-3-phosphocholine        |
| Lmyn005812  | 675.36 | 397.14 | 676.37 | C33H56O14     | [M-H]- | Lipids                      | Gingerglycolipid A                                       |
| Lmhp008744  | 677.37 | 261.22 | 676.37 | C33H56O14     | [M+H]+ | Lipids                      | 1- $\alpha$ -Linolenoyl-glycerol-2,3-di-O-glucoside      |
| pmp001276   | 677.37 | 677.37 | 676.37 | C33H56O14     | [M+H]+ | Lipids                      | 1-Linolenoyl-rac-glycerol-diglucoside                    |
| Lmhp008513  | 677.37 | 261.22 | 676.37 | C33H56O14     | [M+H]+ | Lipids                      | 2- $\alpha$ -Linolenoyl-glycerol-1,3-di-O-glucoside      |
| HJN102      | 677.17 | 515.14 | 678.16 | C34H30O15     | [M-H]- | Phenolic acids              | 3,4,5-Tricaffeoylquinic acid                             |
| Lmgn002250  | 677.17 | 191.06 | 678.18 | C31H34O17     | [M-H]- | Phenolic acids              | Dicaffeoylquinic acid-O-glucoside                        |
| XLn04217    | 677.18 | 515.14 | 678.18 | C31H34O17     | [M-H]- | Phenolic acids              | 1,5-O-dicaffeoyl-3-O-glucoside-quinic acid               |
| Lmyn006011  | 677.38 | 397.13 | 678.38 | C33H58O14     | [M-H]- | Lipids                      | Gingerglycolipid B                                       |
| Lmmn004145  | 675.41 | 397.14 | 679.42 | C38H60O10     | [M-H]- | Terpenoids                  | 3-O-(2-O-Acetyl-glucosyl)oleanolic acid                  |
| Lmyn006221  | 679.39 | 397.13 | 680.40 | C33H60O14     | [M-H]- | Lipids                      | Gingerglycolipid C                                       |
| pmn001370   | 681.24 | 519.19 | 682.25 | C32H42O16     | [M-H]- | Lignans and Coumarins       | Pinoresinol-4,4'-O-di-O-glucoside                        |
| MWSmce499   | 685.27 | 523.22 | 686.28 | C32H46O16     | [M-H]- | Lignans and Coumarins       | Secoisolariciresinol diglucoside                         |
| Lmgn002253  | 695.20 | 353.09 | 696.19 | C31H36O18     | [M-H]- | Phenolic acids              | Syringoylcaffeoylquinic acid-D-glucose                   |
| pmb0709     | 713.16 | 465.20 | 712.15 | C30H32O20     | [M+H]+ | Flavonoids                  | Quercetin-7-O-(6"-malonyl)glucosyl-5-O-glucoside         |
| pmb0706     | 713.16 | 465.10 | 712.15 | C30H32O20     | [M+H]+ | Flavonoids                  | Quercetin-3-O-(6"-O-malonyl)glucosyl-5-O-glucoside       |
| XLn05670    | 715.16 | 353.09 | 716.16 | C33H32O18     | [M-H]- | Phenolic acids              | 3,5-Di-O-caffeoyl-1-O-(2,4-disuccinoyl)-quinic acid      |
| Lmgn004359  | 721.18 | 353.09 | 722.21 | C33H38O18     | [M-H]- | Phenolic acids              | SinapoylcaffeoylQuinic acid O-glucose                    |
| Hmcp001658  | 727.17 | 479.11 | 726.16 | C31H34O20     | [M+H]+ | Flavonoids                  | Isorhamnetin-3-O-(6"-malonyl)glucoside-7-O-glucoside     |
| pme2651     | 742.10 | 620.10 | 743.08 | C21H28N7O17P3 | [M-H]- | Nucleotides and derivatives | NADP (Nicotinamide adenine dinucleotide phosphate)       |
| XLn04903    | 747.15 | 585.12 | 748.15 | C33H32O20     | [M-H]- | Phenolic acids              | 3,5-Di-O-caffeoyl-1-O-(2,4-dimaloyl)-quinic acid         |
| Lmsp003161  | 757.22 | 287.06 | 756.21 | C33H40O20     | [M+H]+ | Flavonoids                  | Kaempferol-3-O-sophoroside-7-O-rhamnoside                |
| HJAP127     | 757.22 | 303.05 | 756.21 | C33H40O20     | [M+H]+ | Flavonoids                  | Quercetin-3-O-(2"-O-Rhamnosyl)rutinoside                 |
| pmn001505   | 763.43 | 763.40 | 764.44 | C41H64O13     | [M-H]- | Terpenoids                  | Oleanolic acid-3-O-xylosyl(1 $\rightarrow$ 3)glucuronide |
| Lmmp002334  | 773.21 | 303.05 | 772.21 | C33H40O21     | [M+H]+ | Flavonoids                  | Quercetin-3-O-rutinoside-7-O-glucoside*                  |

|            |        |        |        |           |                    |                |                                                         |
|------------|--------|--------|--------|-----------|--------------------|----------------|---------------------------------------------------------|
| Zmhp002640 | 773.21 | 303.05 | 772.21 | C33H40O21 | [M+H] <sup>+</sup> | Flavonoids     | 6-Hydroxykaempferol-3-O-Rutinoside-6-O-glucoside*       |
| Lmsp003790 | 787.23 | 317.07 | 786.22 | C34H42O21 | [M+H] <sup>+</sup> | Flavonoids     | Isorhamnetin-3-O-sophoroside-7-O-rhamnoside             |
| XLn05839   | 793.17 | 631.15 | 794.17 | C38H34O19 | [M-H] <sup>-</sup> | Phenolic acids | 3,5-Di-O-caffeoyl-1-O-(2-O-caffeoylmaloyl)-quinic acid  |
| XLn04478   | 793.19 | 631.16 | 794.19 | C35H38O21 | [M-H] <sup>-</sup> | Phenolic acids | 3,5-Di-O-caffeoyl-1-O-(2-O-glucosylmaloyl)-quinic acid* |
| XLn04250   | 793.19 | 631.16 | 794.19 | C35H38O21 | [M-H] <sup>-</sup> | Phenolic acids | 3,5-Di-O-caffeoyl-1-O-(4-O-glucosylmaloyl)-quinic acid* |
| Lmdn000248 | 827.27 | 665.22 | 828.28 | C30H52O26 | [M-H] <sup>-</sup> | Others         | Verbascose                                              |
| XLn05736   | 909.18 | 747.15 | 910.18 | C42H38O23 | [M-H] <sup>-</sup> | Phenolic acids | 3,4,5-Tri-O-caffeoyl-1-O-(2,4-dimaloyl)-quinic acid     |
| Lmsp003853 | 919.25 | 303.05 | 918.24 | C42H46O23 | [M+H] <sup>+</sup> | Flavonoids     | Quercetin-3-O-sophoroside-7-O-rhamnoside                |
| Lmwp004293 | 935.25 | 303.05 | 934.24 | C42H46O24 | [M+H] <sup>+</sup> | Flavonoids     | Quercetin-3-O-sophoroside-7-O-glucoside                 |

**Table S2.** Differential metabolites in the CK\_vs\_T1 , CK\_vs\_T2, CK\_vs\_T3, and CK\_vs\_T4.

| Index      | Formula  | Compounds                       | Class                       | CK_vs_T1 | CK_vs_T2 | CK_vs_T3 | CK_vs_T4 |
|------------|----------|---------------------------------|-----------------------------|----------|----------|----------|----------|
| ML10198895 | C3H7NO2  | N-Methylglycine                 | Amino acids and derivatives | up       | FALSE    | FALSE    | up       |
| pme3033    | C4H9NO2  | N,N-Dimethylglycine             | Amino acids and derivatives | FALSE    | up       | FALSE    | up       |
| pme0010    | C3H7NO3  | L-Serine                        | Amino acids and derivatives | FALSE    | FALSE    | up       | up       |
| mws0147    | C5H10O3  | $\beta$ -Hydroxyisovaleric acid | Organic acids               | down     | FALSE    | FALSE    | FALSE    |
| Lmbp000728 | C8H8O    | (S)-2-Phenylloxirane            | Others                      | up       | up       | up       | FALSE    |
| pme0195    | C3H7NO2S | L-Cysteine                      | Amino acids and derivatives | down     | down     | FALSE    | down     |
| mws0133    | C6H6N2O  | Nicotinamide                    | Others                      | FALSE    | up       | FALSE    | FALSE    |
| MWS2091    | C8H10O   | 1-Phenylethanol                 | Phenolic acids              | FALSE    | FALSE    | up       | FALSE    |
| pme0490    | C6H5NO2  | Nicotinic acid (Vitamin B3)     | Others                      | FALSE    | up       | FALSE    | FALSE    |

|            |          |                                         |                             |       |       |       |       |
|------------|----------|-----------------------------------------|-----------------------------|-------|-------|-------|-------|
| Lmbn000612 | C5H7NO3  | 1-Pyrroline-4-hydroxy-2-carboxylic acid | Organic acids               | FALSE | up    | FALSE | FALSE |
| MWSmce709  | C9H7N    | Isoquinoline                            | Alkaloids                   | FALSE | up    | up    | FALSE |
| MWS0811    | C6H11NO2 | L-Pipecolic Acid                        | Organic acids               | up    | FALSE | FALSE | up    |
| pme2693    | C6H14N2O | N-Acetylputrescine                      | Alkaloids                   | FALSE | down  | FALSE | FALSE |
| Zmpn000638 | C4H9N3O2 | 3-Guanidinopropionic acid               | Organic acids               | up    | FALSE | FALSE | up    |
| mws0473    | C5H8O4   | 2-Methylsuccinic acid*                  | Organic acids               | FALSE | FALSE | FALSE | up    |
| pme0243    | C5H8O4   | Glutaric acid*                          | Organic acids               | down  | FALSE | down  | FALSE |
| Lmrn002746 | C6H12O3  | 2-Hydroxy-4-methylpentanoic acid        | Organic acids               | down  | FALSE | down  | FALSE |
| mws0889    | C4H8O5   | D-Threonic Acid                         | Others                      | FALSE | FALSE | FALSE | up    |
| pme0033    | C5H4N4O  | Hypoxanthine                            | Nucleotides and derivatives | FALSE | up    | FALSE | FALSE |
| MWSmce466  | C8H8O2   | 4-Hydroxyacetophenone*                  | Phenolic acids              | FALSE | FALSE | down  | down  |
| pme1724    | C8H8O2   | Benzoic acid methyl ester               | Phenolic acids              | up    | FALSE | FALSE | FALSE |
| MWS1848    | C8H8O2   | Phenyl acetate*                         | Phenolic acids              | down  | FALSE | down  | down  |
| MWSmce699  | C9H12O   | (Ethoxymethyl)benzene                   | Others                      | FALSE | FALSE | FALSE | down  |
| pme1002    | C8H11NO  | L-Tyramine                              | Alkaloids                   | up    | up    | up    | FALSE |
| mws0749    | C7H6O3   | 4-Hydroxybenzoic acid*                  | Phenolic acids              | up    | up    | FALSE | up    |
| Hmgm001653 | C7H6O3   | Protocatechualdehyde*                   | Phenolic acids              | up    | up    | FALSE | up    |
| pme2828    | C6H5NO3  | 4-Nitrophenol                           | Phenolic acids              | down  | down  | down  | down  |
| Qmkp093004 | C9H7NO   | Indole-3-carboxaldehyde                 | Alkaloids                   | down  | FALSE | FALSE | down  |
| HX1365     | C9H6O2   | Coumarin                                | Lignans and Coumarins       | up    | FALSE | FALSE | up    |
| Zmzn000113 | C5H9NO4  | L-threo-3-Methylaspartate               | Amino acids and derivatives | up    | FALSE | FALSE | FALSE |
| Lmbn000216 | C5H8O5   | 3-Methylmalic acid*                     | Organic acids               | up    | FALSE | up    | up    |
| Zmyn000247 | C5H8O5   | 2-Hydroxyglutaric Acid*                 | Organic acids               | FALSE | FALSE | FALSE | up    |
| Zmyn000230 | C5H8O5   | 2-Dehydro-3-deoxy-L-arabinonate*        | Others                      | FALSE | FALSE | up    | up    |



|            |           |                                                  |                             |       |       |       |       |
|------------|-----------|--------------------------------------------------|-----------------------------|-------|-------|-------|-------|
| pmb2826    | C5H8O5    | L-Citramalic acid                                | Organic acids               | up    | FALSE | up    | up    |
| MWSmce698  | C10H12O   | 2',4'-Dimethylacetophenone                       | Others                      | FALSE | FALSE | FALSE | down  |
| MWSmce463  | C10H12O   | Mesitaldehyde                                    | Others                      | FALSE | FALSE | FALSE | down  |
| Lmgp000796 | C8H7NO2   | 4-Hydroxymandelonitrile                          | Alkaloids                   | FALSE | FALSE | FALSE | up    |
| pme1210    | C5H11NO2S | L-Methionine                                     | Amino acids and derivatives | FALSE | FALSE | FALSE | up    |
| Zmgn000173 | C5H10O5   | D-Ribose                                         | Others                      | up    | FALSE | up    | up    |
| pme1109    | C5H5N5O   | Guanine                                          | Nucleotides and derivatives | up    | up    | up    | up    |
| mws0183    | C7H6O4    | 3,4-Dihydroxybenzoic acid (Protocatechuic acid)* | Phenolic acids              | up    | up    | FALSE | up    |
| mws0180    | C7H6O4    | 2,5-Dihydroxybenzoic acid; Gentisic Acid*        | Phenolic acids              | up    | up    | FALSE | up    |
| pmb0819    | C10H8N2   | 3-Indoleacetonitrile                             | Alkaloids                   | down  | FALSE | FALSE | FALSE |
| mws0005    | C10H12N2  | Tryptamine                                       | Alkaloids                   | down  | FALSE | FALSE | down  |
| pme2914    | C6H10O5   | 3-Hydroxy-3-methylpentane-1,5-dioic acid         | Amino acids and derivatives | FALSE | FALSE | FALSE | up    |
| MWSmce712  | C10H12O2  | Ethyl phenylacetate                              | Phenolic acids              | up    | FALSE | up    | FALSE |
| MWS0274    | C9H10O3   | DL-3-Phenyllactic acid*                          | Organic acids               | down  | FALSE | FALSE | down  |
| NK10253223 | C8H9NO3   | 2-Amino-3-methoxybenzoic acid                    | Phenolic acids              | FALSE | down  | down  | down  |
| Zmjp000624 | C8H9NO3   | Pyridoxal                                        | Others                      | FALSE | down  | down  | down  |
| MWSmce501  | C8H8O4    | Protocatechuic Acid Methyl Ester                 | Phenolic acids              | up    | FALSE | up    | up    |
| pme1383    | C8H11NO3  | Pyridoxine                                       | Others                      | down  | FALSE | FALSE | down  |
| ML10176345 | C7H8O5    | 3-Dehydroshikimic acid                           | Organic acids               | up    | FALSE | FALSE | FALSE |
| pme0253    | C8H15NO3  | N-Acetyl-L-leucine                               | Amino acids and derivatives | FALSE | FALSE | FALSE | up    |
| pme3009    | C6H6O6    | Trans-Citridic acid                              | Organic acids               | down  | FALSE | FALSE | down  |
| MA10039492 | C6H6O6    | Dehydroascorbic acid                             | Others                      | up    | up    | up    | FALSE |

|            |            |                                 |                             |       |       |       |       |
|------------|------------|---------------------------------|-----------------------------|-------|-------|-------|-------|
| mws0154    | C7H10O5    | Shikimic acid                   | Organic acids               | FALSE | FALSE | FALSE | up    |
| Zmyn000155 | C7H14N2O3  | N- $\alpha$ -Acetyl-L-ornithine | Amino acids and derivatives | up    | FALSE | FALSE | FALSE |
| pme2559    | C6H9NO5    | N-Acetyl-L-Aspartic Acid        | Amino acids and derivatives | up    | up    | up    | up    |
| pmb0813    | C10H9NO2   | 1-Methoxyindole-3-carbaldehyde  | Alkaloids                   | up    | up    | FALSE | FALSE |
| mws4175    | C6H8O6     | D-Glucurono-6,3-lactone         | Others                      | FALSE | FALSE | FALSE | down  |
| mws1013    | C9H6O4     | Esculetin                       | Lignans and Coumarins       | FALSE | up    | FALSE | FALSE |
| pmb2795    | C10H10O3   | 4-Methoxycinnamic acid          | Phenolic acids              | up    | up    | FALSE | FALSE |
| mws0981    | C6H5N5O2   | Isoxanthopterin                 | Nucleotides and derivatives | down  | FALSE | down  | down  |
| mws2212    | C9H8O4     | Caffeic acid                    | Phenolic acids              | up    | up    | up    | up    |
| mws1164    | C6H12O6    | D-Fructose*                     | Others                      | up    | FALSE | FALSE | FALSE |
| mws4170    | C6H12O6    | D-Glucose*                      | Others                      | up    | FALSE | FALSE | FALSE |
| Hmln000297 | C6H12O6    | Inositol*                       | Others                      | up    | FALSE | FALSE | FALSE |
| mws0093    | C10H12O3   | Coniferyl alcohol               | Phenolic acids              | FALSE | up    | FALSE | up    |
| MWS2070    | C10H12O3   | Propyl 4-hydroxybenzoate        | Phenolic acids              | down  | FALSE | down  | down  |
| pmb1754    | C5H15NO4P+ | O-Phosphocholine                | Alkaloids                   | up    | up    | up    | up    |
| Hmmp001310 | C11H9NO2   | 3-Indoleacrylic acid            | Alkaloids                   | down  | FALSE | FALSE | FALSE |
| pme0137    | C7H12N2O4  | N-Acetyl-L-Glutamine            | Amino acids and derivatives | up    | down  | FALSE | up    |
| pme0075    | C7H11NO5   | N-Acetyl-L-glutamic acid        | Amino acids and derivatives | up    | FALSE | FALSE | up    |
| pme2244    | C11H11NO2  | 3-Indolepropionic acid          | Alkaloids                   | down  | FALSE | FALSE | down  |
| mws0597    | C10H9NO3   | 5-Hydroxyindole-3-acetic acid   | Alkaloids                   | FALSE | FALSE | up    | FALSE |
| Zmyn000453 | C6H8O7     | Isocitric Acid                  | Organic acids               | up    | up    | up    | FALSE |

|             |            |                                       |                             |       |       |       |       |
|-------------|------------|---------------------------------------|-----------------------------|-------|-------|-------|-------|
| Lmmp002080  | C11H16N2O  | N-(4-Aminobutyl)benzamide             | Alkaloids                   | up    | FALSE | FALSE | up    |
| pme3705     | C6H10O7    | D-Glucuronic acid                     | Others                      | FALSE | FALSE | FALSE | up    |
| XLn05261    | C9H8O5     | Salicylic acid                        | Phenolic acids              | up    | up    | up    | up    |
| Zmzn000079  | C4H9O7P    | D-Erythrose-4-phosphate               | Others                      | up    | up    | up    | up    |
| Zmbp002538  | C11H12N2O2 | 1-Methoxy-indole-3-acetamide          | Alkaloids                   | down  | FALSE | FALSE | down  |
| mws0282     | C11H12N2O2 | L-Tryptophan                          | Amino acids and derivatives | down  | FALSE | FALSE | down  |
| pmb0818     | C11H11NO3  | Methoxyindoleacetic acid              | Alkaloids                   | down  | FALSE | FALSE | down  |
| MWS0618     | C9H19NO4   | Pantothenol                           | Others                      | FALSE | FALSE | down  | FALSE |
| pme3443     | C11H12O4   | Sinapinaldehyde                       | Phenolic acids              | up    | up    | up    | up    |
| pme1654     | C12H18O3   | Jasmonic acid                         | Organic acids               | up    | up    | FALSE | FALSE |
| MWS1900     | C11H20O4   | Undecanedioic acid                    | Lipids                      | down  | FALSE | FALSE | FALSE |
| mws5045     | C12H24O3   | 12-Hydroxydodecanoic acid             | Lipids                      | down  | FALSE | down  | down  |
| pme1228     | C11H12N2O3 | 5-Hydroxy-L-tryptophan                | Amino acids and derivatives | down  | FALSE | down  | down  |
| Lmtp005226  | C15H24O    | Santalol                              | Others                      | FALSE | FALSE | FALSE | down  |
| MWS20178    | C11H10O5   | isofraxidin                           | Lignans and Coumarins       | down  | FALSE | FALSE | FALSE |
| mws0520     | C11H13NO4  | N-Acetyl-L-tyrosine                   | Amino acids and derivatives | FALSE | down  | FALSE | up    |
| pme0220     | C13H20O3   | Methyl jasmonate                      | Organic acids               | FALSE | FALSE | FALSE | down  |
| HJAP051     | C12H18O4   | 3-(3,4,5-Trimethoxyphenyl)propan-1-ol | Phenolic acids              | up    | FALSE | FALSE | FALSE |
| pma6455     | C5H11O8P   | Ribulose-5-phosphate                  | Others                      | up    | up    | up    | up    |
| mws0474     | C12H22O4   | Dodecanedioic acid                    | Organic acids               | down  | FALSE | down  | down  |
| Lmhp001670  | C11H22N2O3 | L-Valyl-L-Leucine                     | Amino acids and derivatives | FALSE | up    | FALSE | up    |
| Lmjpb007763 | C15H20O2   | 6,7-Dehydroartemisinic acid           | Terpenoids                  | up    | FALSE | up    | up    |

|            |            |                                |                             |       |       |       |       |
|------------|------------|--------------------------------|-----------------------------|-------|-------|-------|-------|
| pmb0962    | C10H22N2O4 | L-Lysine-Butanoic Acid         | Amino acids and derivatives | FALSE | down  | FALSE | down  |
| Jmbn003202 | C10H20O6   | Butyl Beta-D-Fructopyranoside  | Others                      | up    | up    | up    | up    |
| Lmcp006516 | C15H24O2   | Baimuxinal                     | Terpenoids                  | FALSE | FALSE | FALSE | down  |
| pme0264    | C10H14N2O5 | Thymidine                      | Nucleotides and derivatives | down  | FALSE | FALSE | FALSE |
| MWS2430    | C15H30O2   | 13-methylmyristic acid         | Lipids                      | FALSE | down  | FALSE | down  |
| pme3732    | C9H13N3O5  | Cytidine                       | Nucleotides and derivatives | FALSE | FALSE | FALSE | down  |
| ML10180524 | C9H13N3O5  | Cytarabine                     | Nucleotides and derivatives | FALSE | up    | FALSE | FALSE |
| mws0248    | C9H12N2O6  | Uridine                        | Nucleotides and derivatives | FALSE | up    | FALSE | FALSE |
| Lmhp002031 | C12H24N2O3 | L-Leucyl-L-Leucine             | Amino acids and derivatives | FALSE | up    | up    | up    |
| MWSmce062  | C15H18O3   | Xanthatin                      | Terpenoids                  | FALSE | FALSE | FALSE | down  |
| Hmcn003273 | C15H20O3   | Reynosin                       | Terpenoids                  | up    | up    | up    | up    |
| Jmcn007352 | C15H22O3   | 5 $\alpha$ -Hydroxycostic acid | Terpenoids                  | up    | up    | up    | up    |
| pme3961    | C10H13N5O3 | 2'-Deoxyadenosine              | Nucleotides and derivatives | FALSE | up    | FALSE | FALSE |
| Lmcn009122 | C16H30O2   | (7Z)-Hexadecenoic acid         | Lipids                      | FALSE | FALSE | down  | FALSE |
| MWSHY0124  | C15H12O4   | Pinocembrin (Dihydrochrysin)   | Flavonoids                  | down  | down  | down  | down  |
| mws0120    | C8H20NO6P  | Choline Alfoscerate            | Lipids                      | up    | up    | up    | up    |
| Zmyn000110 | C6H14NO8P  | D-Glucosamine 1-phosphate      | Others                      | up    | up    | up    | up    |
| mws0866    | C6H13O9P   | D-Glucose 6-phosphate*         | Others                      | up    | up    | up    | up    |
| MWS2442    | C6H13O9P   | D-Fructose 6-Phosphate*        | Others                      | up    | up    | up    | up    |

|            |            |                                               |                             |       |       |       |       |
|------------|------------|-----------------------------------------------|-----------------------------|-------|-------|-------|-------|
| Zmpn000095 | C6H15O9P   | Sorbitol-6-phosphate                          | Others                      | up    | up    | up    | up    |
| Lmhp001732 | C14H18N2O3 | L-Prolyl-L-Phenylalanine                      | Amino acids and derivatives | FALSE | FALSE | up    | up    |
| mws0715    | C13H16N2O4 | Phenylacetyl-L-glutamine                      | Amino acids and derivatives | down  | FALSE | down  | FALSE |
| Lmhp002001 | C14H20N2O3 | L-Valyl-L-Phenylalanine                       | Amino acids and derivatives | FALSE | FALSE | FALSE | up    |
| Zmgn001039 | C9H17NO6S  | S-Ribosyl-L-homocysteine                      | Amino acids and derivatives | FALSE | FALSE | down  | FALSE |
| pme0230    | C10H13N5O4 | Adenosine*                                    | Nucleotides and derivatives | FALSE | FALSE | down  | FALSE |
| mws0037    | C16H12O4   | Formononetin (7-Hydroxy-4'-methoxyisoflavone) | Flavonoids                  | down  | down  | down  | down  |
| mws1060    | C10H12N4O5 | 9-(Arabinosyl)hypoxanthine                    | Nucleotides and derivatives | up    | up    | up    | FALSE |
| MWS20151   | C15H10O5   | Apigenin; 4',5,7-Trihydroxyflavone            | Flavonoids                  | FALSE | FALSE | up    | FALSE |
| Lmyn006227 | C15H10O5   | 3,5,7-Trihydroxyflavone                       | Flavonoids                  | FALSE | FALSE | up    | FALSE |
| mws1297    | C13H18O6   | Benzyl glucoside                              | Phenolic acids              | FALSE | FALSE | FALSE | down  |
| pmb0034    | C10H16N2O7 | L- $\alpha$ -Glutamyl-L-Glutamic Acid         | Amino acids and derivatives | down  | FALSE | down  | down  |
| pmb1574    | C18H28O2   | 9,12-Octadecadien-6-Ynoic Acid                | Lipids                      | down  | up    | FALSE | FALSE |
| Wmln002759 | C14H17NO5  | 4-(Rhamnosyloxy)phenylacetoneitrile           | Alkaloids                   | down  | down  | down  | FALSE |
| Hmhp001812 | C11H15N5O4 | 2'-O-Methyladenosine                          | Nucleotides and derivatives | FALSE | FALSE | up    | FALSE |
| YC512118   | C18H35NO   | Oleamide (9-Octadecenamide)                   | Lipids                      | FALSE | FALSE | FALSE | up    |
| pme1178    | C10H13N5O5 | Guanosine                                     | Nucleotides and derivatives | FALSE | up    | FALSE | FALSE |

|            |            |                                               |                             |       |       |       |       |
|------------|------------|-----------------------------------------------|-----------------------------|-------|-------|-------|-------|
| MWSmce089  | C17H17NO3  | p-Coumaroyltyramine                           | Alkaloids                   | FALSE | down  | FALSE | down  |
| mws0129    | C16H12O5   | Apigenin 7-methyl ether*                      | Flavonoids                  | down  | FALSE | FALSE | down  |
| mws0051    | C16H12O5   | Acacetin*                                     | Flavonoids                  | down  | FALSE | FALSE | down  |
| mws0918    | C16H12O5   | Prunetin (5,4'-Dihydroxy-7-methoxyisoflavone) | Flavonoids                  | down  | FALSE | FALSE | down  |
| mws4160    | C16H12O5   | 5,7-Dihydroxy-8-Methoxyflavone*               | Flavonoids                  | down  | FALSE | FALSE | down  |
| mws1505    | C17H16O4   | Phenethyl caffeate                            | Phenolic acids              | down  | down  | FALSE | down  |
| Hmbp002730 | C15H10O6   | Isoscutellarein*                              | Flavonoids                  | up    | FALSE | up    | FALSE |
| Lmmp004504 | C15H10O6   | 2'-Hydroxygenistein*                          | Flavonoids                  | FALSE | FALSE | up    | FALSE |
| MWSHY0058  | C15H10O6   | Luteolin (5,7,3',4'-Tetrahydroxyflavone)*     | Flavonoids                  | FALSE | FALSE | up    | FALSE |
| pmp000727  | C15H17N3O3 | Feruloylhistamine                             | Alkaloids                   | FALSE | FALSE | FALSE | down  |
| Lmsp004137 | C15H12O6   | 3,4,2',4',6'-Pentahydroxychalcone             | Flavonoids                  | FALSE | FALSE | FALSE | down  |
| mws1496    | C17H23NO3  | L-Hyoscyamine                                 | Alkaloids                   | down  | FALSE | FALSE | FALSE |
| pmb2787    | C18H30O3   | 9-Oxo-10E,12Z-octadecadienoic acid            | Lipids                      | FALSE | up    | FALSE | FALSE |
| Lmqp000329 | C8H14N3O7P | 5-Aminoimidazole ribonucleotide               | Nucleotides and derivatives | up    | up    | up    | up    |
| Lmhn102068 | C13H12O8   | 2-O-Caffeoylmalic acid                        | Phenolic acids              | down  | FALSE | FALSE | FALSE |
| Hmqp005411 | C18H32O3   | 9-Oxo-12Z-Octadecenoic acid                   | Lipids                      | FALSE | FALSE | down  | FALSE |
| Hmqp005455 | C18H32O3   | 15(R)-Hydroxylinoleic Acid                    | Lipids                      | FALSE | FALSE | down  | FALSE |
| Zmhn001358 | C13H16O8   | 4-O-Glucosyl-4-hydroxybenzoic acid*           | Phenolic acids              | up    | FALSE | FALSE | FALSE |
| MWS5235    | C18H36O3   | 12-Hydroxyoctadecanoic acid                   | Lipids                      | FALSE | down  | down  | down  |
| Zmyn005384 | C18H36O3   | 2R-Hydroxyoctadecanoic Acid                   | Lipids                      | FALSE | FALSE | FALSE | up    |
| pmp001176  | C17H19NO4  | Dihydrocaffeoyltyramine                       | Alkaloids                   | FALSE | FALSE | FALSE | down  |
| mws0920    | C15H10O7   | Tricetin (5,7,3',4',5'-Pentahydroxyflavone)   | Flavonoids                  | up    | up    | up    | up    |
| MWSmce549  | C17H34O4   | 1-Monomyristin                                | Lipids                      | FALSE | FALSE | up    | FALSE |
| mws1375    | C12H21N3O6 | Nicotianamine                                 | Alkaloids                   | down  | FALSE | FALSE | FALSE |
| mws0042    | C15H14O7   | Epigallocatechin                              | Flavonoids                  | down  | down  | down  | FALSE |

|            |             |                                                                      |                             |       |       |       |       |
|------------|-------------|----------------------------------------------------------------------|-----------------------------|-------|-------|-------|-------|
| pme1373    | C9H14N3O7P  | 2'-Deoxycytidine-5'-monophosphate                                    | Nucleotides and derivatives | down  | FALSE | FALSE | FALSE |
| pme1086    | C10H17N3O6S | Glutathione reduced form                                             | Amino acids and derivatives | FALSE | down  | FALSE | FALSE |
| pmb2601    | C15H16O7    | 7-Hydroxycoumarin-O-rhamnoside                                       | Lignans and Coumarins       | up    | up    | up    | up    |
| Hmqp006221 | C19H34O3    | 13-Hydroxy-9Z,11E-octadecadienoic acid                               | Lipids                      | FALSE | FALSE | up    | FALSE |
| pmn001689  | C18H32O4    | 9-Hydroxy-12-oxo-15(Z)-octadecenoic acid                             | Lipids                      | FALSE | up    | up    | up    |
| Lmbn007891 | C18H34O4    | Hydroxy ricinoleic acid                                              | Lipids                      | FALSE | FALSE | up    | FALSE |
| mws0066    | C16H12O7    | Isorhamnetin                                                         | Flavonoids                  | FALSE | FALSE | up    | FALSE |
| Jmwn002172 | C14H20O8    | 3,4-dihydroxyphenylethanol- $\beta$ -D-glucopyranoside               | Phenolic acids              | down  | FALSE | FALSE | down  |
| Hmtn001120 | C14H20O8    | 5-(2-Hydroxyethyl)-2-O-glucosylphenol                                | Phenolic acids              | FALSE | FALSE | down  | down  |
| mws0582    | C11H19N3O6S | S-(Methyl)glutathione                                                | Amino acids and derivatives | up    | up    | FALSE | up    |
| pme2074    | C18H29NO4   | (-)-Jasmonoyl-L-Isoleucine                                           | Organic acids               | up    | up    | up    | up    |
| pme3188    | C9H13N2O9P  | Uridine 5'-monophosphate                                             | Nucleotides and derivatives | up    | up    | up    | FALSE |
| Lmbp003825 | C15H16O8    | Skimmin (7-Hydroxycoumarin-7-O-glucoside)                            | Lignans and Coumarins       | up    | up    | FALSE | up    |
| Hmqp006023 | C20H36O3    | Ethyl 9-Hydroxy-10,12-octadecadienoic acid                           | Lipids                      | FALSE | FALSE | down  | FALSE |
| mws0983    | C20H39NO2   | N-Oleoylethanolamine                                                 | Alkaloids                   | FALSE | FALSE | down  | FALSE |
| HX1255     | C20H22O4    | (+)-trans-1,2-dihydrodehydroguaiaretic acid                          | Lignans and Coumarins       | FALSE | down  | up    | FALSE |
| pmn001691  | C18H32O5    | 9,12,13-Trihydroxy-10,15-octadecadienoic acid                        | Lipids                      | FALSE | up    | FALSE | FALSE |
| mws0884    | C10H12N5O6P | Cyclic 3',5'-Adenylic acid                                           | Nucleotides and derivatives | FALSE | FALSE | down  | FALSE |
| Lmbn003970 | C18H34O5    | 9,12,13-TriHOME; 9(S),12(S),13(S)-Trihydroxy-10(E)-octadecenoic acid | Lipids                      | FALSE | FALSE | FALSE | up    |
| pmp001284  | C19H38O4    | Monopalmitin                                                         | Lipids                      | FALSE | FALSE | FALSE | down  |

|            |             |                                                  |                             |       |       |       |       |
|------------|-------------|--------------------------------------------------|-----------------------------|-------|-------|-------|-------|
| pmc0066    | C10H13N4O7P | 2'-Deoxyinosine-5'-monophosphate                 | Nucleotides and derivatives | up    | up    | up    | up    |
| pmn001421  | C16H18O8    | 3-O-p-Coumaroylquinic acid*                      | Phenolic acids              | up    | up    | FALSE | up    |
| pmb3074    | C16H18O8    | 5-O-p-Coumaroylquinic acid*                      | Phenolic acids              | up    | up    | FALSE | up    |
| pmb4777    | C16H18O8    | 4-Hydroxy-7-methoxycoumarin- $\beta$ -rhamnoside | Lignans and Coumarins       | up    | up    | up    | up    |
| Zmyn000083 | C6H14O12P2  | D-Glucose 1,6-bisphosphate                       | Others                      | up    | up    | up    | up    |
| Hmcm004128 | C16H20O8    | P-Methoxycinnamate glucoside                     | Phenolic acids              | FALSE | FALSE | FALSE | up    |
| Lmsn002548 | C15H18O9    | 1-O-Caffeoyl- $\beta$ -D-glucose*                | Phenolic acids              | up    | FALSE | down  | up    |
| mws0264    | C12H22O11   | D-Trehalose                                      | Others                      | up    | FALSE | FALSE | up    |
| Lmjn005592 | C18H16O7    | 4',5-Dihydroxy-3',6,7-trimethoxyflavone          | Flavonoids                  | down  | down  | down  | down  |
| mws0609    | C10H12N5O7P | Guanosine 3',5'-cyclic monophosphate             | Nucleotides and derivatives | up    | up    | up    | up    |
| HX1364     | C16H18O9    | isoscopoletin-glucoside                          | Lignans and Coumarins       | up    | up    | FALSE | up    |
| pmp001283  | C21H38O4    | 1-Monolinolein                                   | Lipids                      | down  | FALSE | down  | down  |
| pmb0296    | C21H40O4    | 1-Oleoyl-Sn-Glycerol                             | Lipids                      | FALSE | FALSE | down  | down  |
| mws0097    | C20H22O6    | Pinoresinol                                      | Lignans and Coumarins       | FALSE | FALSE | down  | FALSE |
| pmb0964    | C16H23N5O5  | Isopentenyladenine-7-N-glucoside                 | Nucleotides and derivatives | up    | FALSE | FALSE | up    |
| Lmgp003270 | C16H16O10   | Scopoletin-7-O-glucuronide                       | Lignans and Coumarins       | up    | up    | up    | up    |
| mws0179    | C17H20O9    | Chlorogenic acid methyl ester                    | Phenolic acids              | up    | up    | up    | up    |
| mws0055    | C20H20O7    | 4',5,6,7,8-Pentamethoxyflavone                   | Flavonoids                  | up    | FALSE | down  | FALSE |
| mws0232    | C17H20N4O6  | Riboflavin (Vitamin B2)                          | Others                      | FALSE | FALSE | FALSE | down  |
| Lmjp003090 | C17H20O10   | Isofraxidin-7-O-glucoside                        | Lignans and Coumarins       | FALSE | FALSE | down  | FALSE |
| pmn001423  | C19H30O8    | Roseoside                                        | Others                      | up    | FALSE | FALSE | FALSE |
| Lmmp010562 | C24H38O4    | Diisooctyl Phthalate*                            | Phenolic acids              | down  | FALSE | FALSE | FALSE |
| mws0043    | C21H22O8    | 5,6,7,8,3',4'-Hexamethoxyflavone                 | Flavonoids                  | up    | FALSE | down  | FALSE |



|            |               |                                               |                             |       |       |       |       |
|------------|---------------|-----------------------------------------------|-----------------------------|-------|-------|-------|-------|
| pme3007    | C9H14N2O12P2  | Uridine 5'-diphosphate                        | Nucleotides and derivatives | up    | up    | up    | up    |
| pmd0152    | C19H39O7P     | LysoPA 16:0 (2n isomer)                       | Lipids                      | FALSE | up    | up    | up    |
| pmd0153    | C19H39O7P     | LysoPA 16:0                                   | Lipids                      | FALSE | up    | up    | up    |
| mws2523    | C12H23O14P    | Trehalose 6-phosphate                         | Others                      | up    | up    | FALSE | up    |
| Lmhp008337 | C19H40NO7P    | LysoPE 14:0(2n isomer)                        | Lipids                      | up    | up    | up    | up    |
| pmb0864    | C19H40NO7P    | LysoPE 14:0                                   | Lipids                      | up    | up    | up    | up    |
| pme2117    | C10H15N5O10P2 | Adenosine 5'-diphosphate                      | Nucleotides and derivatives | up    | FALSE | up    | up    |
| pmp001248  | C20H30NO9+    | Caffeoylcholine-4-O-glucoside                 | Alkaloids                   | FALSE | FALSE | down  | FALSE |
| Cmbn007148 | C22H22O9      | 1-O-Feruloyl-3-O-caffeoylglycerol             | Lipids                      | FALSE | FALSE | up    | FALSE |
| pme3504    | C22H22O9      | Formononetin-7-O-glycoside (Ononin)           | Flavonoids                  | down  | down  | down  | down  |
| pmp000413  | C21H20O10     | Genistein-8-C-glucoside                       | Flavonoids                  | FALSE | down  | FALSE | FALSE |
| Lmdp003509 | C20H18O11     | Quercetin-3-O-xyloside*                       | Flavonoids                  | up    | FALSE | FALSE | up    |
| mws2186    | C20H18O11     | Quercetin-3-O- $\alpha$ -L-arabinofuranoside* | Flavonoids                  | up    | FALSE | FALSE | up    |
| Lmhp008273 | C20H40NO7P    | LysoPE 15:1(2n isomer)                        | Lipids                      | up    | up    | up    | up    |
| Lmhp008440 | C20H40NO7P    | LysoPE 15:1                                   | Lipids                      | FALSE | up    | up    | FALSE |
| Lmhp009187 | C20H42NO7P    | LysoPE 15:0                                   | Lipids                      | up    | up    | up    | up    |
| Lmhp008885 | C20H42NO7P    | LysoPE 15:0(2n isomer)                        | Lipids                      | up    | up    | up    | up    |
| Hmcp002316 | C21H20O11     | Isorhamnetin-3-O-arabinoside                  | Flavonoids                  | up    | FALSE | FALSE | up    |
| Xmyp005654 | C21H20O11     | Kaempferol-4'-O-glucoside*                    | Flavonoids                  | FALSE | up    | up    | FALSE |
| Lmmn004625 | C21H22O11     | Dihydrokaempferol-7-O-glucoside*              | Flavonoids                  | up    | up    | FALSE | up    |
| MWS20145   | C21H22O11     | Eriodictyol-7-O-glucoside*                    | Flavonoids                  | down  | FALSE | FALSE | FALSE |
| HJN086     | C21H22O11     | Eriodictyol-3'-O-glucoside*                   | Flavonoids                  | up    | up    | FALSE | up    |
| Jmgn004021 | C21H22O11     | 6-C-Glucosyl-2-Hydroxynaringenin              | Flavonoids                  | down  | FALSE | down  | down  |
| Lmhp009034 | C21H42NO7P    | LysoPE 16:1                                   | Lipids                      | up    | up    | up    | up    |

|            |            |                                                           |                |       |       |       |       |
|------------|------------|-----------------------------------------------------------|----------------|-------|-------|-------|-------|
| Lmhp008763 | C21H42NO7P | LysoPE 16:1(2n isomer)                                    | Lipids         | up    | up    | up    | up    |
| Hmpn005101 | C21H24O11  | Sieboldin                                                 | Flavonoids     | down  | FALSE | FALSE | FALSE |
| Zmhn001257 | C21H24O11  | Catechin-5-O-glucoside                                    | Flavonoids     | up    | FALSE | up    | FALSE |
| pmd0160    | C21H44NO7P | LysoPE 16:0(2n isomer)                                    | Lipids         | up    | up    | up    | up    |
| pmb0876    | C21H44NO7P | LysoPE 16:0                                               | Lipids         | up    | up    | up    | up    |
| Lmhn004756 | C23H20O10  | Cinnamoylferuloyltartaric acid                            | Phenolic acids | down  | down  | FALSE | down  |
| Zmjn014062 | C30H48O3   | (23S)-3 $\beta$ -hydroxydammara-21-oic acid 21,23-lactone | Terpenoids     | up    | up    | FALSE | up    |
| pmb2654    | C19H27NO12 | Anthranilate-1-O-Sophoroside                              | Phenolic acids | up    | up    | FALSE | up    |
| Lmhn002321 | C21H18O12  | Vnilloylcaffeoyltartaric acid                             | Phenolic acids | FALSE | FALSE | FALSE | up    |
| pmb3012    | C22H22O11  | Chrysoeriol-7-O-glucoside                                 | Flavonoids     | down  | FALSE | FALSE | down  |
| pmp001309  | C21H20O12  | 6-Hydroxykaempferol-7-O-glucoside                         | Flavonoids     | up    | FALSE | FALSE | up    |
| Hmcn001884 | C21H20O12  | 6-Hydroxyluteolin 5-glucoside                             | Flavonoids     | FALSE | FALSE | up    | FALSE |
| MWSHY0046  | C21H20O12  | Quercetin-3-O-glucoside*                                  | Flavonoids     | FALSE | FALSE | up    | FALSE |
| Lmdp003286 | C21H20O12  | Isohyperoside*                                            | Flavonoids     | up    | up    | up    | up    |
| MWSHY0113  | C21H20O12  | Quercetin-3-O-galactoside*                                | Flavonoids     | up    | up    | up    | up    |
| mws1329    | C21H20O12  | Quercetin-7-O-glucoside                                   | Flavonoids     | up    | up    | up    | up    |
| Smgp004575 | C21H20O12  | Quercetin-5-O- $\beta$ -D-glucoside*                      | Flavonoids     | FALSE | FALSE | up    | up    |
| Lmhp009769 | C22H44NO7P | LysoPE 17:1                                               | Lipids         | up    | up    | up    | up    |
| Xmsn002700 | C21H22O12  | Taxifolin-3'-O-glucoside                                  | Flavonoids     | up    | FALSE | FALSE | up    |
| pmd0130    | C22H46NO7P | LysoPC 14:0                                               | Lipids         | FALSE | up    | up    | FALSE |
| Qmgp102003 | C29H41NO4  | O-Acetylajervine                                          | Alkaloids      | FALSE | up    | up    | FALSE |
| Lmhp008233 | C23H40NO7P | LysoPE 18:4                                               | Lipids         | up    | up    | up    | FALSE |
| Lmhp008801 | C23H42NO7P | LysoPE 18:3                                               | Lipids         | up    | up    | up    | up    |
| Lmhp008589 | C23H42NO7P | LysoPE 18:3(2n isomer)                                    | Lipids         | up    | up    | up    | up    |
| pmb0881    | C23H44NO7P | LysoPE 18:2                                               | Lipids         | up    | up    | up    | up    |
| pmb0874    | C23H44NO7P | LysoPE 18:2(2n isomer)                                    | Lipids         | up    | up    | up    | up    |

|            |            |                                                               |                |       |       |       |       |
|------------|------------|---------------------------------------------------------------|----------------|-------|-------|-------|-------|
| Lmmp003783 | C21H18O13  | Quercetin-3-O-glucuronide                                     | Flavonoids     | up    | up    | up    | up    |
| Lmqp003647 | C21H18O13  | Herbacetin-3-O-glucuronide                                    | Flavonoids     | up    | FALSE | up    | FALSE |
| Lmcp003788 | C22H22O12  | Isotamarixin                                                  | Flavonoids     | FALSE | FALSE | up    | FALSE |
| Hmcp002207 | C22H22O12  | Isorhamnetin-7-O-glucoside*                                   | Flavonoids     | FALSE | FALSE | up    | FALSE |
| mws0289    | C23H46NO7P | LysoPE 18:1                                                   | Lipids         | up    | up    | up    | up    |
| pmb2260    | C23H46NO7P | LysoPC 15:1                                                   | Lipids         | FALSE | up    | up    | up    |
| pmb0856    | C23H46NO7P | LysoPE 18:1(2n isomer)                                        | Lipids         | up    | up    | up    | up    |
| pmb0880    | C23H48NO7P | LysoPE 18:0(2n isomer)                                        | Lipids         | up    | up    | up    | up    |
| Lmhp009129 | C23H48NO7P | LysoPC 15:0(2n isomer)                                        | Lipids         | FALSE | up    | up    | FALSE |
| pmb0883    | C23H48NO7P | LysoPE 18:0                                                   | Lipids         | up    | up    | up    | up    |
| pmb2319    | C23H48NO7P | LysoPC 15:0                                                   | Lipids         | FALSE | up    | up    | up    |
| Lmsn011830 | C30H46O5   | 2 $\alpha$ ,19 $\alpha$ -Dihydroxy-3-oxours-12-en-28-oic acid | Terpenoids     | FALSE | FALSE | up    | FALSE |
| Lmmn003398 | C23H22O12  | Kaempferol-3-O-(6"-acetyl)glucoside                           | Flavonoids     | FALSE | FALSE | FALSE | down  |
| pmb0863    | C24H46NO7P | LysoPC 16:2(2n isomer)                                        | Lipids         | up    | up    | up    | up    |
| pmp001270  | C24H48NO7P | LysoPC 16:1                                                   | Lipids         | FALSE | up    | up    | FALSE |
| Lmhp008833 | C24H48NO7P | LysoPC 16:1(2n isomer)                                        | Lipids         | up    | up    | up    | up    |
| pmd0132    | C24H50NO7P | LysoPC 16:0(2n isomer)                                        | Lipids         | up    | up    | up    | up    |
| pmb0855    | C24H50NO7P | LysoPC 16:0                                                   | Lipids         | up    | up    | up    | up    |
| mad2394    | C24H22O12  | Sinapoyl-p-coumaroyltartaric acid                             | Phenolic acids | up    | FALSE | FALSE | up    |
| Lmhp009802 | C25H46NO7P | LysoPE 20:3(2n isomer)                                        | Lipids         | up    | up    | up    | up    |
| Lmhp010040 | C25H46NO7P | LysoPE 20:3                                                   | Lipids         | up    | up    | up    | up    |
| mws1589    | C18H32O16  | D-Panose                                                      | Others         | up    | FALSE | FALSE | up    |
| MWS0442    | C18H32O16  | Maltotriose                                                   | Others         | FALSE | FALSE | down  | FALSE |
| Lmhp010514 | C25H48NO7P | LysoPE 20:2(2n isomer)                                        | Lipids         | up    | up    | up    | up    |
| Lmhp008718 | C25H48NO7P | LysoPC 17:2                                                   | Lipids         | up    | up    | up    | up    |
| Lmhp010757 | C25H48NO7P | LysoPE 20:2                                                   | Lipids         | up    | up    | up    | up    |

|            |               |                                                |                             |       |       |       |       |
|------------|---------------|------------------------------------------------|-----------------------------|-------|-------|-------|-------|
| Hmln002199 | C23H22O13     | Quercetin-3-O-(6"-O-acetyl)galactoside         | Flavonoids                  | up    | FALSE | FALSE | up    |
| Lmhp009590 | C25H50NO7P    | LysoPC 17:1                                    | Lipids                      | FALSE | up    | up    | FALSE |
| pmb2406    | C25H52NO7P    | LysoPC 17:0                                    | Lipids                      | FALSE | up    | FALSE | FALSE |
| Lmgp004518 | C26H24O11     | CaffeoylferuloylQuinic acid                    | Phenolic acids              | up    | up    | up    | up    |
| Lmhp009773 | C27H46O9      | 1- $\alpha$ -Linolenoyl-glycerol-3-O-glucoside | Lipids                      | FALSE | FALSE | down  | down  |
| Hmqp006235 | C26H46NO7P    | LysoPC 18:4                                    | Lipids                      | up    | up    | up    | up    |
| MWSmce328  | C25H24O12     | Isochlorogenic acid C                          | Phenolic acids              | up    | up    | FALSE | up    |
| Li512115   | C25H24O12     | Isochlorogenic acid B                          | Phenolic acids              | up    | FALSE | FALSE | up    |
| Wmzn002116 | C25H24O12     | 3,5-Dicaffeoylquinic acid                      | Phenolic acids              | FALSE | FALSE | FALSE | up    |
| mws1584    | C25H24O12     | 1,3-O-Dicaffeoylquinic Acid                    | Phenolic acids              | FALSE | FALSE | FALSE | up    |
| Lmhp010573 | C27H48O9      | 1-Linoleoylglycerol-3-O-glucoside              | Lipids                      | FALSE | FALSE | FALSE | down  |
| pmb0854    | C26H48NO7P    | LysoPC 18:3                                    | Lipids                      | up    | up    | up    | up    |
| pmb0865    | C26H48NO7P    | LysoPC 18:3(2n isomer)                         | Lipids                      | up    | up    | up    | up    |
| pmp001273  | C26H50NO7P    | LysoPC 18:2                                    | Lipids                      | up    | up    | up    | up    |
| pmp001251  | C26H50NO7P    | LysoPC 18:2(2n isomer)                         | Lipids                      | up    | up    | up    | up    |
| pmn001644  | C23H20O14     | Quercetin-3-O-(2"-O-acetyl)glucuronide         | Flavonoids                  | down  | FALSE | FALSE | FALSE |
| pmp000682  | C26H32O11     | Matairesinol-4'-O-glucoside                    | Lignans and Coumarins       | FALSE | up    | up    | FALSE |
| pmp001281  | C26H52NO7P    | LysoPC 18:1                                    | Lipids                      | FALSE | up    | up    | up    |
| Lmhp010190 | C26H52NO7P    | LysoPC 18:1(2n isomer)                         | Lipids                      | up    | up    | up    | up    |
| pmn001710  | C24H26O13     | Rosmarinic acid-3'-O-glucoside                 | Phenolic acids              | FALSE | FALSE | FALSE | down  |
| Zmgp005070 | C24H26O13     | Centaurein                                     | Flavonoids                  | FALSE | FALSE | down  | FALSE |
| pmd0136    | C26H54NO7P    | LysoPC 18:0(2n isomer)                         | Lipids                      | up    | up    | up    | up    |
| mws0126    | C26H54NO7P    | LysoPC 18:0                                    | Lipids                      | up    | up    | up    | up    |
| Lmjp003731 | C26H26O12     | 3,4-O-Dicaffeoylquinic Acid Methyl Ester       | Phenolic acids              | up    | up    | up    | up    |
| Zmfn000481 | C14H22N2O16P2 | Uridine-5'-Diphosphate-D-Xylose                | Nucleotides and derivatives | up    | FALSE | up    | up    |

|            |               |                                                      |                             |       |       |       |       |
|------------|---------------|------------------------------------------------------|-----------------------------|-------|-------|-------|-------|
| Lmdn001925 | C26H34O12     | Olivil-4'-O-glucoside                                | Lignans and Coumarins       | down  | FALSE | FALSE | down  |
| pmc0960    | C28H50NO7P    | LysoPC 20:4                                          | Lipids                      | FALSE | FALSE | down  | down  |
| Lmhp009890 | C28H52NO7P    | LysoPC 20:3                                          | Lipids                      | FALSE | up    | FALSE | FALSE |
| pmd0146    | C28H54NO7P    | LysoPC 20:2(2n isomer)                               | Lipids                      | FALSE | up    | up    | up    |
| pmd0147    | C28H54NO7P    | LysoPC 20:2                                          | Lipids                      | FALSE | up    | up    | up    |
| pma0702    | C29H39N3O8    | N1,N8-Bis(sinapoyl)spermidine                        | Alkaloids                   | down  | FALSE | down  | down  |
| Lmhn003802 | C26H26O14     | Sinapoylsinapoyltartaric acid                        | Phenolic acids              | FALSE | FALSE | down  | FALSE |
| Zmhp005139 | C25H24O15     | Tamarixetin-3-O-(6"-malonyl)glucoside*               | Flavonoids                  | up    | FALSE | FALSE | up    |
| pmb2922    | C15H24N2O17P2 | Uridine 5'-diphospho-D-glucose                       | Nucleotides and derivatives | up    | FALSE | FALSE | FALSE |
| Hmcp001769 | C26H28O15     | Quercetin-3-O-rhamnosyl(1→2)arabinoside              | Flavonoids                  | FALSE | up    | up    | up    |
| Rfmb056    | C29H36O13     | Medioresinol-4'-O-(6"-acetyl)glucoside               | Lignans and Coumarins       | FALSE | FALSE | down  | FALSE |
| Lmsn002815 | C27H30O15     | Kaempferol-3-O-rutinoside                            | Flavonoids                  | down  | down  | FALSE | down  |
| Lmjp002596 | C26H28O16     | Quercetin-3-O-sambubioside                           | Flavonoids                  | up    | FALSE | FALSE | up    |
| Lmmp000897 | C30H26O14     | Gallocatechin-(4α→8)-gallocatechin                   | Flavonoids                  | up    | up    | FALSE | up    |
| Lmsp004166 | C27H30O16     | Quercetin-3-O-glucoside-7-O-rhamnoside               | Flavonoids                  | up    | FALSE | FALSE | up    |
| pmb0665    | C27H30O16     | Orientin-7-O-glucoside                               | Flavonoids                  | up    | FALSE | FALSE | up    |
| mws4134    | C20H32N6O12S2 | Oxiglutatione                                        | Amino acids and derivatives | FALSE | FALSE | up    | FALSE |
| Cmcp003531 | C27H32O16     | Okanin-4'-O-gentiobioside                            | Flavonoids                  | down  | FALSE | down  | down  |
| XLn05122   | C29H28O15     | 1,4-O-dicaffeoyl-3-O-succinoyl-quinic acid*          | Phenolic acids              | up    | up    | up    | up    |
| XLn05515   | C29H28O15     | 1,5-O-dicaffeoyl-3-O-succinoyl-quinic acid*          | Phenolic acids              | up    | up    | up    | up    |
| Lmhp003217 | C28H32O16     | 2'-Hydroxy,5-methoxyGenistein-O-rhamnosyl-glucoside* | Flavonoids                  | FALSE | FALSE | FALSE | up    |
| Lmmp002463 | C28H32O16     | Sexangularetin-3-O-glucoside-7-O-rhamnoside*         | Flavonoids                  | FALSE | FALSE | FALSE | up    |
| MWSHY0064  | C28H32O16     | Isorhamnetin-3-O-neohesperidoside*                   | Flavonoids                  | FALSE | FALSE | FALSE | up    |
| Lmsp004721 | C28H32O16     | Tamarixetin-3-O-glucoside-7-O-rhamnoside*            | Flavonoids                  | FALSE | FALSE | FALSE | up    |

|            |            |                                                                    |                |       |       |       |       |
|------------|------------|--------------------------------------------------------------------|----------------|-------|-------|-------|-------|
| Lmnp002584 | C28H32O16  | Hispidulin-8-C-(2"-O-glucosyl)glucoside*                           | Flavonoids     | FALSE | down  | FALSE | FALSE |
| Zmdp003457 | C27H30O17  | Myricetin-3-O-galactoside-3'-O-rhamnoside*                         | Flavonoids     | FALSE | FALSE | FALSE | up    |
| MWSHY0162  | C27H30O17  | Quercetin-3-O-sophoroside (Baimaside)*                             | Flavonoids     | up    | FALSE | FALSE | up    |
| Lmsp003729 | C27H30O17  | Myricetin-3-O-rutinoside*                                          | Flavonoids     | FALSE | FALSE | FALSE | up    |
| Zmcp002666 | C27H30O17  | Quercetin-3,7-Di-O-glucoside                                       | Flavonoids     | up    | FALSE | FALSE | up    |
| HJN038     | C28H24O17  | Myricetin-3-O-(6"-galloyl)glucoside                                | Flavonoids     | up    | FALSE | FALSE | up    |
| Lmmp002560 | C27H28O18  | Quercetin-3-O-(2"-O-glucosyl)glucuronide                           | Flavonoids     | up    | FALSE | up    | FALSE |
| Hmcp001578 | C28H32O17  | Isorhamnetin-3,7-O-diglucoside                                     | Flavonoids     | up    | up    | up    | up    |
| XLn05373   | C31H32O16  | 1,5-O-dicaffeoyl-3-O-dimethylmalyl-quinic acid                     | Phenolic acids | FALSE | FALSE | up    | FALSE |
| mws4163    | C24H42O21  | Nystose                                                            | Others         | up    | FALSE | FALSE | FALSE |
| mws1593    | C24H42O21  | D-Maltotetraose                                                    | Others         | up    | FALSE | FALSE | up    |
| Lmqn000213 | C24H42O21  | Stachyose                                                          | Others         | up    | up    | FALSE | up    |
| Lmxp010913 | C35H66NO9P | 1-(9Z-Octadecenoyl)-2-(9-oxo-nonanoyl)-sn-glycero-3-phosphocholine | Lipids         | down  | FALSE | FALSE | FALSE |
| Lmyn005812 | C33H56O14  | Gingerglycolipid A                                                 | Lipids         | FALSE | up    | FALSE | FALSE |
| Lmhp008744 | C33H56O14  | 1- $\alpha$ -Linolenoyl-glycerol-2,3-di-O-glucoside                | Lipids         | FALSE | up    | FALSE | FALSE |
| pmp001276  | C33H56O14  | 1-Linolenoyl-rac-glycerol-diglucoside                              | Lipids         | FALSE | FALSE | down  | down  |
| HJN102     | C34H30O15  | 3,4,5-Tricaffeoylquinic acid                                       | Phenolic acids | up    | up    | FALSE | up    |
| Lmgn002250 | C31H34O17  | Dicaffeoylquinic acid-O-glucoside                                  | Phenolic acids | down  | down  | down  | down  |
| XLn04217   | C31H34O17  | 1,5-O-dicaffeoyl-3-O-glucoside-quinic acid                         | Phenolic acids | up    | up    | FALSE | up    |
| Lmyn006011 | C33H58O14  | Gingerglycolipid B                                                 | Lipids         | FALSE | up    | FALSE | FALSE |
| Lmmn004145 | C38H60O10  | 3-O-(2-O-Acetyl-glucosyl)oleanolic acid                            | Terpenoids     | FALSE | up    | FALSE | FALSE |
| Lmgn002253 | C31H36O18  | Syringoylcaffeoylquinic acid-D-glucose                             | Phenolic acids | up    | FALSE | FALSE | FALSE |
| pmb0709    | C30H32O20  | Quercetin-7-O-(6"-malonyl)glucosyl-5-O-glucoside                   | Flavonoids     | FALSE | FALSE | down  | FALSE |
| pmb0706    | C30H32O20  | Quercetin-3-O-(6"-O-malonyl)glucosyl-5-O-glucoside                 | Flavonoids     | FALSE | FALSE | FALSE | up    |
| XLn05670   | C33H32O18  | 3,5-Di-O-caffeoyl-1-O-(2,4-disuccinoyl)-quinic acid                | Phenolic acids | up    | up    | up    | up    |
| Lmgn004359 | C33H38O18  | SinapoylcaffeoylQuinic acid O-glucose                              | Phenolic acids | up    | FALSE | FALSE | FALSE |

|            |               |                                                         |                             |       |       |       |       |
|------------|---------------|---------------------------------------------------------|-----------------------------|-------|-------|-------|-------|
| Hmcp001658 | C31H34O20     | Isorhamnetin-3-O-(6"-malonyl)glucoside-7-O-glucoside    | Flavonoids                  | up    | FALSE | FALSE | up    |
| pme2651    | C21H28N7O17P3 | NADP (Nicotinamide adenine dinucleotide phosphate)      | Nucleotides and derivatives | up    | FALSE | up    | up    |
| HJAP127    | C33H40O20     | Quercetin-3-O-(2"-O-Rhamnosyl)rutinoside                | Flavonoids                  | up    | FALSE | FALSE | up    |
| Zmhp002640 | C33H40O21     | 6-Hydroxykaempferol-3-O-Rutinoside-6-O-glucoside*       | Flavonoids                  | up    | FALSE | FALSE | FALSE |
| XLn05839   | C38H34O19     | 3,5-Di-O-caffeoyl-1-O-(2-O-caffeoylmaloyl)-quinic acid  | Phenolic acids              | FALSE | up    | FALSE | FALSE |
| XLn04478   | C35H38O21     | 3,5-Di-O-caffeoyl-1-O-(2-O-glucosylmaloyl)-quinic acid* | Phenolic acids              | up    | up    | FALSE | up    |
| XLn04250   | C35H38O21     | 3,5-Di-O-caffeoyl-1-O-(4-O-glucosylmaloyl)-quinic acid* | Phenolic acids              | up    | up    | FALSE | up    |
| Lmdn000248 | C30H52O26     | Verbascose                                              | Others                      | up    | up    | FALSE | up    |
| XLn05736   | C42H38O23     | 3,4,5-Tri-O-caffeoyl-1-O-(2,4-dimaloyl)-quinic acid     | Phenolic acids              | FALSE | up    | FALSE | FALSE |

**Table S3.** Variation of differential metabolite expression content in group T1 vs T3.

| Formula  | Compounds                       | Class                       | T1       | T3       | VIP  | p_value | FDR  | Fold_Change | Type |
|----------|---------------------------------|-----------------------------|----------|----------|------|---------|------|-------------|------|
| C5H11NO2 | 5-Aminovaleric acid             | Organic acids               | 6.76E+04 | 2.10E+04 | 1.12 | 0.18    | 0.37 | 0.31        | down |
| C5H10O3  | $\beta$ -Hydroxyisovaleric acid | Organic acids               | 5.94E+05 | 1.54E+06 | 1.35 | 0.11    | 0.33 | 2.59        | up   |
| C8H8O    | (S)-2-Phenyloxirane             | Others                      | 1.44E+07 | 6.66E+06 | 1.05 | 0.17    | 0.36 | 0.46        | down |
| C3H7NO2S | L-Cysteine                      | Amino acids and derivatives | 1.05E+05 | 2.37E+05 | 1.03 | 0.29    | 0.50 | 2.26        | up   |
| C8H10O   | 1-Phenylethanol                 | Phenolic acids              | 2.03E+05 | 4.99E+05 | 1.32 | 0.07    | 0.29 | 2.45        | up   |
| C4H9N3O2 | 3-Guanidinopropionic acid       | Organic acids               | 8.17E+04 | 3.68E+04 | 1.52 | 0.00    | 0.04 | 0.45        | down |
| C4H6O5   | 3-Dehydro-L-Threonic Acid*      | Others                      | 1.22E+07 | 2.80E+07 | 1.24 | 0.13    | 0.33 | 2.29        | up   |
| C4H6O5   | D-Malic acid*                   | Organic acids               | 1.11E+07 | 2.58E+07 | 1.24 | 0.12    | 0.33 | 2.32        | up   |
| C8H8O2   | Benzoic acid methyl ester       | Phenolic acids              | 5.54E+04 | 9.00E+00 | 1.53 | 0.00    | 0.13 | 0.00        | down |
| C8H11NO  | L-Tyramine                      | Alkaloids                   | 1.60E+07 | 7.34E+06 | 1.05 | 0.17    | 0.36 | 0.46        | down |
| C5H4N4O2 | Xanthine                        | Nucleotides and derivatives | 9.36E+04 | 2.30E+05 | 1.24 | 0.10    | 0.32 | 2.45        | up   |
| C8H8O3   | Vanillin                        | Phenolic acids              | 6.95E+04 | 1.39E+05 | 1.40 | 0.01    | 0.18 | 2.00        | up   |

|            |                                       |                             |          |          |      |      |      |          |      |
|------------|---------------------------------------|-----------------------------|----------|----------|------|------|------|----------|------|
| C10H12N2   | Tryptamine                            | Alkaloids                   | 1.95E+05 | 5.66E+05 | 1.31 | 0.11 | 0.33 | 2.89     | up   |
| C10H12O2   | Ethyl phenylacetate                   | Phenolic acids              | 3.01E+05 | 8.29E+05 | 1.36 | 0.09 | 0.32 | 2.76     | up   |
| C8H8O4     | Protocatechuic Acid Methyl Ester      | Phenolic acids              | 3.09E+05 | 1.04E+05 | 1.26 | 0.14 | 0.34 | 0.34     | down |
| C7H14N2O3  | N- $\alpha$ -Acetyl-L-ornithine       | Amino acids and derivatives | 2.99E+06 | 1.13E+06 | 1.51 | 0.00 | 0.07 | 0.38     | down |
| C10H9NO2   | 1-Methoxyindole-3-carbaldehyde        | Alkaloids                   | 3.29E+04 | 9.00E+00 | 1.53 | 0.02 | 0.24 | 0.00     | down |
| C11H12O2   | Ethyl cinnamate                       | Phenolic acids              | 1.67E+04 | 3.72E+04 | 1.37 | 0.03 | 0.28 | 2.23     | up   |
| C10H10O3   | 4-Methoxycinnamic acid                | Phenolic acids              | 8.24E+03 | 3.59E+03 | 1.00 | 0.13 | 0.33 | 0.44     | down |
| C9H8O4     | Caffeic acid                          | Phenolic acids              | 3.38E+06 | 1.35E+06 | 1.13 | 0.23 | 0.44 | 0.40     | down |
| C6H12O6    | D-Fructose*                           | Others                      | 8.39E+06 | 3.44E+06 | 1.32 | 0.06 | 0.29 | 0.41     | down |
| C6H12O6    | D-Glucose*                            | Others                      | 7.04E+06 | 2.92E+06 | 1.31 | 0.06 | 0.29 | 0.41     | down |
| C6H12O6    | Inositol*                             | Others                      | 8.26E+06 | 3.42E+06 | 1.32 | 0.06 | 0.29 | 0.41     | down |
| C7H12N2O4  | N-Acetyl-L-Glutamine                  | Amino acids and derivatives | 3.80E+05 | 8.18E+04 | 1.45 | 0.07 | 0.29 | 0.22     | down |
| C8H16N2O3  | L-Glycyl-L-isoleucine                 | Amino acids and derivatives | 2.41E+05 | 5.34E+05 | 1.20 | 0.06 | 0.29 | 2.22     | up   |
| C7H11NO5   | N-Acetyl-L-glutamic acid              | Amino acids and derivatives | 1.36E+06 | 6.52E+05 | 1.42 | 0.07 | 0.29 | 0.48     | down |
| C9H19NO4   | Pantothenol                           | Others                      | 2.21E+04 | 3.75E+03 | 1.14 | 0.11 | 0.33 | 0.17     | down |
| C11H12O4   | Ethyl caffeate                        | Phenolic acids              | 6.65E+04 | 2.59E+04 | 1.31 | 0.02 | 0.26 | 0.39     | down |
| C12H18O3   | Jasmonic acid                         | Organic acids               | 1.25E+05 | 5.72E+04 | 1.17 | 0.08 | 0.30 | 0.46     | down |
| C12H24O3   | 12-Hydroxydodecanoic acid             | Lipids                      | 1.09E+04 | 9.00E+00 | 1.52 | 0.10 | 0.32 | 0.00     | down |
| C12H18O4   | 3-(3,4,5-Trimethoxyphenyl)propan-1-ol | Phenolic acids              | 1.41E+06 | 5.81E+04 | 1.43 | 0.08 | 0.31 | 0.04     | down |
| C10H20O6   | Butyl Beta-D-Fructopyranoside         | Others                      | 2.69E+05 | 1.30E+05 | 1.22 | 0.10 | 0.32 | 0.48     | down |
| C10H14N2O5 | Thymidine                             | Nucleotides and derivatives | 9.00E+00 | 3.36E+04 | 1.53 | 0.07 | 0.29 | 3736.33  | up   |
| C16H30O2   | (7Z)-Hexadecenoic acid                | Lipids                      | 1.97E+04 | 9.81E+03 | 1.41 | 0.04 | 0.28 | 0.50     | down |
| C15H10O5   | Apigenin; 4',5,7-Trihydroxyflavone    | Flavonoids                  | 7.88E+04 | 1.76E+05 | 1.27 | 0.11 | 0.32 | 2.23     | up   |
| C15H10O5   | 3,5,7-Trihydroxyflavone               | Flavonoids                  | 1.23E+05 | 2.97E+05 | 1.46 | 0.03 | 0.27 | 2.42     | up   |
| C18H28O2   | 9,12-Octadecadien-6-Ynoic Acid        | Lipids                      | 9.00E+00 | 4.26E+05 | 1.53 | 0.02 | 0.26 | 47386.30 | up   |
| C17H16O4   | Phenethyl caffeate                    | Phenolic acids              | 1.03E+05 | 2.24E+05 | 1.19 | 0.15 | 0.34 | 2.18     | up   |



|             |                                                   |                             |          |          |      |      |      |         |      |
|-------------|---------------------------------------------------|-----------------------------|----------|----------|------|------|------|---------|------|
| C15H10O6    | 2'-Hydroxygenistein*                              | Flavonoids                  | 3.00E+04 | 7.40E+04 | 1.41 | 0.07 | 0.29 | 2.47    | up   |
| C15H10O6    | Luteolin (5,7,3',4'-Tetrahydroxyflavone)*         | Flavonoids                  | 3.00E+04 | 7.40E+04 | 1.41 | 0.07 | 0.29 | 2.47    | up   |
| C17H23NO3   | L-Hyoscyamine                                     | Alkaloids                   | 1.09E+04 | 2.24E+04 | 1.34 | 0.02 | 0.23 | 2.05    | up   |
| C13H12O8    | 2-O-Caffeoylmalic acid                            | Phenolic acids              | 9.00E+00 | 7.24E+04 | 1.53 | 0.14 | 0.34 | 8044.37 | up   |
| C18H32O3    | 9-Oxo-12Z-Octadecenoic acid                       | Lipids                      | 3.31E+05 | 1.47E+05 | 1.15 | 0.18 | 0.37 | 0.44    | down |
| C18H34O3    | Ricinoleic acid                                   | Lipids                      | 5.96E+04 | 2.02E+05 | 1.19 | 0.23 | 0.44 | 3.39    | up   |
| C20H42O     | 1-Eicosanol                                       | Lipids                      | 6.16E+04 | 1.96E+05 | 1.18 | 0.23 | 0.44 | 3.18    | up   |
| C13H16O8    | 4-O-Glucosyl-4-hydroxybenzoic acid*               | Phenolic acids              | 9.65E+05 | 2.66E+05 | 1.38 | 0.04 | 0.28 | 0.28    | down |
| C17H34O4    | 1-Monomyristin                                    | Lipids                      | 3.54E+05 | 7.32E+05 | 1.46 | 0.04 | 0.28 | 2.07    | up   |
| C9H14N3O7P  | 2'-Deoxycytidine-5'-monophosphate                 | Nucleotides and derivatives | 9.00E+00 | 1.08E+04 | 1.53 | 0.01 | 0.15 | 1204.77 | up   |
| C16H12O7    | Isorhamnetin                                      | Flavonoids                  | 7.14E+05 | 1.52E+06 | 1.32 | 0.05 | 0.29 | 2.12    | up   |
| C11H19N3O6S | S-(Methyl)glutathione                             | Amino acids and derivatives | 1.14E+05 | 4.96E+04 | 1.22 | 0.02 | 0.25 | 0.44    | down |
| C15H16O8    | Skimmin (7-Hydroxycoumarin-7-O-glucoside)         | Lignans and Coumarins       | 2.06E+06 | 8.37E+05 | 1.40 | 0.09 | 0.31 | 0.41    | down |
| C20H36O3    | Ethyl 9-Hydroxy-10,12-octadecadienoic acid        | Lipids                      | 9.59E+04 | 2.43E+04 | 1.25 | 0.12 | 0.33 | 0.25    | down |
| C20H39NO2   | N-Oleoylethanolamine                              | Alkaloids                   | 6.21E+05 | 1.60E+05 | 1.26 | 0.12 | 0.33 | 0.26    | down |
| C20H22O4    | (+)-trans-1,2-dihydrodehydroguaiaretic acid       | Lignans and Coumarins       | 7.55E+03 | 1.77E+04 | 1.18 | 0.14 | 0.33 | 2.35    | up   |
| C14H18O9    | 1-O-Vanilloyl-D-Glucose*                          | Phenolic acids              | 1.30E+05 | 6.16E+04 | 1.45 | 0.00 | 0.13 | 0.47    | down |
| C14H18O9    | 5-Glucosyloxy-2-Hydroxybenzoic acid methyl ester* | Phenolic acids              | 1.80E+05 | 8.07E+04 | 1.32 | 0.05 | 0.29 | 0.45    | down |
| C10H13N4O7P | 2'-Deoxyinosine-5'-monophosphate                  | Nucleotides and derivatives | 2.18E+06 | 7.00E+05 | 1.10 | 0.03 | 0.27 | 0.32    | down |
| C16H18O8    | 5-O-p-Coumaroylquinic acid*                       | Phenolic acids              | 2.67E+07 | 1.31E+07 | 1.30 | 0.08 | 0.30 | 0.49    | down |
| C15H16O9    | Daphnin*                                          | Lignans and Coumarins       | 1.80E+06 | 8.61E+05 | 1.52 | 0.00 | 0.13 | 0.48    | down |
| C15H16O9    | Esculetin-7-O-glucoside*                          | Lignans and Coumarins       | 2.02E+06 | 9.82E+05 | 1.52 | 0.00 | 0.13 | 0.49    | down |
| C15H18O9    | 1-O-Caffeoyl-β-D-glucose*                         | Phenolic acids              | 8.72E+05 | 1.49E+05 | 1.13 | 0.04 | 0.28 | 0.17    | down |
| C12H22O11   | D-Trehalose                                       | Others                      | 1.39E+06 | 5.27E+05 | 1.16 | 0.11 | 0.33 | 0.38    | down |
| C18H16O7    | 4',5-Dihydroxy-3',6,7-trimethoxyflavone           | Flavonoids                  | 7.91E+03 | 3.72E+02 | 1.28 | 0.10 | 0.32 | 0.05    | down |
| C21H38O4    | 1-Monolinolein                                    | Lipids                      | 3.24E+04 | 9.00E+00 | 1.53 | 0.05 | 0.29 | 0.00    | down |

|            |                                                           |                             |          |          |      |      |      |         |      |
|------------|-----------------------------------------------------------|-----------------------------|----------|----------|------|------|------|---------|------|
| C20H22O6   | Pinoresinol                                               | Lignans and Coumarins       | 7.30E+04 | 2.66E+04 | 1.37 | 0.09 | 0.32 | 0.36    | down |
| C16H23N5O5 | Isopentenyladenine-7-N-glucoside                          | Nucleotides and derivatives | 4.26E+05 | 1.31E+05 | 1.46 | 0.05 | 0.29 | 0.31    | down |
| C20H20O7   | 4',5,6,7,8-Pentamethoxyflavone                            | Flavonoids                  | 2.76E+05 | 1.03E+04 | 1.36 | 0.30 | 0.51 | 0.04    | down |
| C19H30O8   | Roseoside                                                 | Others                      | 3.83E+05 | 1.49E+05 | 1.49 | 0.00 | 0.13 | 0.39    | down |
| C21H22O8   | 5,6,7,8,3',4'-Hexamethoxyflavone                          | Flavonoids                  | 2.02E+05 | 1.33E+04 | 1.41 | 0.19 | 0.38 | 0.07    | down |
| C20H40NO7P | LysoPE 15:1(2n isomer)                                    | Lipids                      | 8.38E+03 | 1.69E+04 | 1.10 | 0.21 | 0.41 | 2.01    | up   |
| C20H40NO7P | LysoPE 15:1                                               | Lipids                      | 1.15E+04 | 3.19E+04 | 1.33 | 0.10 | 0.32 | 2.76    | up   |
| C20H42NO7P | LysoPE 15:0                                               | Lipids                      | 9.06E+04 | 2.05E+05 | 1.24 | 0.09 | 0.31 | 2.26    | up   |
| C20H42NO7P | LysoPE 15:0(2n isomer)                                    | Lipids                      | 8.17E+04 | 1.87E+05 | 1.41 | 0.03 | 0.27 | 2.28    | up   |
| C21H22O11  | Dihydrokaempferol-7-O-glucoside*                          | Flavonoids                  | 1.47E+06 | 2.46E+05 | 1.37 | 0.17 | 0.36 | 0.17    | down |
| C21H22O11  | Eriodictyol-3'-O-glucoside*                               | Flavonoids                  | 1.53E+06 | 2.43E+05 | 1.36 | 0.19 | 0.38 | 0.16    | down |
| C23H20O10  | Cinnamoylferuloyltartaric acid                            | Phenolic acids              | 9.00E+00 | 7.48E+04 | 1.53 | 0.03 | 0.26 | 8306.15 | up   |
| C30H48O3   | (23S)-3 $\beta$ -hydroxydammara-21-oic acid 21,23-lactone | Terpenoids                  | 5.55E+03 | 9.00E+00 | 1.53 | 0.01 | 0.17 | 0.00    | down |
| C19H27NO12 | Anthranilate-1-O-Sophoroside                              | Phenolic acids              | 1.26E+06 | 3.32E+05 | 1.43 | 0.00 | 0.14 | 0.26    | down |
| C21H18O12  | Vnilloylcaffeoyltartaric acid                             | Phenolic acids              | 6.32E+04 | 3.15E+04 | 1.20 | 0.15 | 0.34 | 0.50    | down |
| C21H22O12  | Taxifolin-3'-O-glucoside                                  | Flavonoids                  | 4.15E+05 | 1.66E+05 | 1.15 | 0.10 | 0.32 | 0.40    | down |
| C22H22O12  | Isotamarixin                                              | Flavonoids                  | 2.17E+05 | 6.62E+05 | 1.21 | 0.15 | 0.34 | 3.05    | up   |
| C23H46NO7P | LysoPE 18:1                                               | Lipids                      | 7.26E+05 | 1.51E+06 | 1.37 | 0.06 | 0.29 | 2.08    | up   |
| C23H46NO7P | LysoPC 15:1                                               | Lipids                      | 5.26E+04 | 1.11E+05 | 1.52 | 0.00 | 0.07 | 2.12    | up   |
| C23H46NO7P | LysoPE 18:1(2n isomer)                                    | Lipids                      | 4.38E+05 | 8.83E+05 | 1.33 | 0.07 | 0.29 | 2.02    | up   |
| C23H48NO7P | LysoPE 18:0(2n isomer)                                    | Lipids                      | 9.00E+03 | 2.03E+04 | 1.30 | 0.03 | 0.27 | 2.26    | up   |
| C23H48NO7P | LysoPC 15:0                                               | Lipids                      | 3.25E+05 | 6.91E+05 | 1.43 | 0.06 | 0.29 | 2.13    | up   |
| C24H48NO7P | LysoPC 16:1                                               | Lipids                      | 1.68E+05 | 5.81E+05 | 1.24 | 0.06 | 0.29 | 3.46    | up   |
| C25H46NO7P | LysoPE 20:3(2n isomer)                                    | Lipids                      | 1.07E+04 | 2.54E+04 | 1.44 | 0.04 | 0.28 | 2.38    | up   |
| C25H46NO7P | LysoPE 20:3                                               | Lipids                      | 1.28E+04 | 3.00E+04 | 1.31 | 0.10 | 0.32 | 2.35    | up   |
| C18H32O16  | D-Panose                                                  | Others                      | 5.86E+05 | 5.89E+04 | 1.39 | 0.08 | 0.31 | 0.10    | down |

|            |                                        |                       |          |          |      |      |      |       |      |
|------------|----------------------------------------|-----------------------|----------|----------|------|------|------|-------|------|
| C18H32O16  | Maltotriose                            | Others                | 1.11E+06 | 2.72E+05 | 1.29 | 0.10 | 0.32 | 0.25  | down |
| C25H48NO7P | LysoPE 20:2(2n isomer)                 | Lipids                | 1.71E+04 | 3.84E+04 | 1.24 | 0.08 | 0.30 | 2.25  | up   |
| C25H48NO7P | LysoPC 17:2                            | Lipids                | 5.62E+04 | 1.15E+05 | 1.35 | 0.04 | 0.28 | 2.05  | up   |
| C25H48NO7P | LysoPE 20:2                            | Lipids                | 1.84E+04 | 4.14E+04 | 1.20 | 0.11 | 0.33 | 2.25  | up   |
| C25H50NO7P | LysoPC 17:1                            | Lipids                | 1.30E+05 | 2.77E+05 | 1.45 | 0.01 | 0.17 | 2.12  | up   |
| C25H24O12  | Isochlorogenic acid C                  | Phenolic acids        | 9.52E+05 | 4.29E+05 | 1.44 | 0.01 | 0.18 | 0.45  | down |
| C25H24O12  | 3,5-Dicaffeoylquinic acid              | Phenolic acids        | 1.30E+07 | 6.03E+06 | 1.49 | 0.01 | 0.14 | 0.46  | down |
| C25H24O12  | 1,3-O-Dicaffeoylquinic Acid            | Phenolic acids        | 1.22E+07 | 5.12E+06 | 1.51 | 0.00 | 0.13 | 0.42  | down |
| C23H20O14  | Quercetin-3-O-(2"-O-acetyl)glucuronide | Flavonoids            | 3.34E+04 | 8.63E+04 | 1.15 | 0.12 | 0.33 | 2.58  | up   |
| C26H52NO7P | LysoPC 18:1                            | Lipids                | 9.00E+00 | 4.33E+06 | 1.53 | 0.01 | 0.14 | ##### | up   |
| C24H26O13  | Rosmarinic acid-3'-O-glucoside         | Phenolic acids        | 1.14E+05 | 2.72E+05 | 1.35 | 0.06 | 0.29 | 2.38  | up   |
| C24H26O13  | Centaurein                             | Flavonoids            | 1.00E+05 | 4.36E+04 | 1.51 | 0.00 | 0.13 | 0.44  | down |
| C26H54NO7P | LysoPC 18:0(2n isomer)                 | Lipids                | 3.44E+05 | 6.89E+05 | 1.28 | 0.14 | 0.33 | 2.00  | up   |
| C26H54NO7P | LysoPC 18:0                            | Lipids                | 3.44E+05 | 6.89E+05 | 1.28 | 0.14 | 0.33 | 2.00  | up   |
| C24H22O14  | Luteolin-7-O-(6"-malonyl)glucoside     | Flavonoids            | 1.09E+05 | 4.26E+04 | 1.39 | 0.04 | 0.28 | 0.39  | down |
| C28H50NO7P | LysoPC 20:4                            | Lipids                | 1.03E+04 | 9.00E+00 | 1.49 | 0.20 | 0.40 | 0.00  | down |
| C28H54NO7P | LysoPC 20:2(2n isomer)                 | Lipids                | 6.28E+04 | 1.68E+05 | 1.41 | 0.06 | 0.29 | 2.68  | up   |
| C28H54NO7P | LysoPC 20:2                            | Lipids                | 6.64E+04 | 1.66E+05 | 1.48 | 0.04 | 0.28 | 2.50  | up   |
| C24H22O15  | Quercetin-7-O-(6"-malonyl)glucoside    | Flavonoids            | 1.06E+07 | 3.44E+06 | 1.44 | 0.01 | 0.15 | 0.33  | down |
| C26H26O14  | Sinapoylsinapoyltartaric acid          | Phenolic acids        | 1.13E+04 | 9.00E+00 | 1.53 | 0.01 | 0.17 | 0.00  | down |
| C25H24O15  | Tamarixetin-3-O-(6"-malonyl)glucoside* | Flavonoids            | 3.48E+06 | 9.16E+05 | 1.52 | 0.02 | 0.23 | 0.26  | down |
| C29H36O13  | Medioresinol-4'-O-(6"-acetyl)glucoside | Lignans and Coumarins | 9.88E+04 | 1.58E+04 | 1.11 | 0.20 | 0.39 | 0.16  | down |
| C27H30O15  | Kaempferol-3-O-rutinoside              | Flavonoids            | 6.37E+05 | 1.32E+06 | 1.30 | 0.09 | 0.31 | 2.07  | up   |
| C26H28O16  | Quercetin-3-O-sambubioside             | Flavonoids            | 1.38E+06 | 6.77E+05 | 1.46 | 0.02 | 0.26 | 0.49  | down |
| C29H34O17  | Syringetin-3-O-rutinoside              | Flavonoids            | 2.71E+06 | 1.19E+06 | 1.39 | 0.06 | 0.29 | 0.44  | down |
| C24H42O21  | D-Maltotetraose                        | Others                | 1.62E+05 | 1.69E+04 | 1.36 | 0.00 | 0.07 | 0.10  | down |

|            |                                                                    |                |          |          |      |      |      |      |      |
|------------|--------------------------------------------------------------------|----------------|----------|----------|------|------|------|------|------|
| C24H42O21  | Stachyose                                                          | Others         | 4.79E+05 | 7.21E+04 | 1.45 | 0.00 | 0.14 | 0.15 | down |
| C35H66NO9P | 1-(9Z-Octadecenoyl)-2-(9-oxo-nonanoyl)-sn-glycero-3-phosphocholine | Lipids         | 9.63E+03 | 3.60E+04 | 1.10 | 0.10 | 0.32 | 3.74 | up   |
| C34H30O15  | 3,4,5-Tricaffeoylquinic acid                                       | Phenolic acids | 8.12E+06 | 1.22E+06 | 1.34 | 0.15 | 0.34 | 0.15 | down |
| C31H34O17  | 1,5-O-dicaffeoyl-3-O-glucoside-quinic acid                         | Phenolic acids | 9.56E+06 | 1.43E+06 | 1.33 | 0.16 | 0.35 | 0.15 | down |
| C31H36O18  | Syringoylcaffeoylquinic acid-D-glucose                             | Phenolic acids | 2.52E+06 | 9.43E+05 | 1.48 | 0.01 | 0.18 | 0.37 | down |
| C30H32O20  | Quercetin-7-O-(6"-malonyl)glucosyl-5-O-glucoside                   | Flavonoids     | 4.79E+04 | 4.13E+03 | 1.21 | 0.00 | 0.13 | 0.09 | down |
| C30H32O20  | Quercetin-3-O-(6"-O-malonyl)glucosyl-5-O-glucoside                 | Flavonoids     | 6.29E+04 | 2.92E+04 | 1.23 | 0.12 | 0.33 | 0.46 | down |
| C33H40O21  | 6-Hydroxykaempferol-3-O-Rutinoside-6-O-glucoside*                  | Flavonoids     | 3.41E+06 | 1.52E+06 | 1.48 | 0.00 | 0.13 | 0.44 | down |
| C35H38O21  | 3,5-Di-O-caffeoyl-1-O-(2-O-glucosylmaloyl)-quinic acid*            | Phenolic acids | 1.97E+06 | 5.03E+05 | 1.23 | 0.03 | 0.26 | 0.25 | down |
| C35H38O21  | 3,5-Di-O-caffeoyl-1-O-(4-O-glucosylmaloyl)-quinic acid*            | Phenolic acids | 1.97E+06 | 5.03E+05 | 1.23 | 0.03 | 0.26 | 0.25 | down |
| C30H52O26  | Verbascose                                                         | Others         | 8.78E+04 | 8.22E+03 | 1.36 | 0.03 | 0.26 | 0.09 | down |

**Table S4.** Variation of differential metabolite expression content in group T2 vs T3.

| Formula  | Compounds                               | Class                       | T2       | T3       | VIP  | p_value | FDR  | Fold_Change | Type |
|----------|-----------------------------------------|-----------------------------|----------|----------|------|---------|------|-------------|------|
| C3H7NO3  | L-Serine                                | Amino acids and derivatives | 8.39E+04 | 8.39E+04 | 1.55 | 0.02    | 0.39 | 2.89        | up   |
| C8H10O   | 1-Phenylethanol                         | Phenolic acids              | 1.16E+05 | 1.16E+05 | 1.59 | 0.05    | 0.40 | 4.29        | up   |
| C5H7NO3  | 1-Pyrroline-4-hydroxy-2-carboxylic acid | Organic acids               | 6.10E+04 | 6.10E+04 | 1.05 | 0.22    | 0.53 | 0.44        | down |
| C6H14N2O | N-Acetylputrescine                      | Alkaloids                   | 2.98E+05 | 2.98E+05 | 1.36 | 0.13    | 0.47 | 2.90        | up   |
| C5H8O4   | Glutaric acid*                          | Organic acids               | 1.19E+06 | 1.19E+06 | 1.66 | 0.23    | 0.53 | 0.00        | down |
| C6H12O3  | 2-Hydroxy-4-methylpentanoic acid        | Organic acids               | 2.86E+06 | 2.86E+06 | 1.40 | 0.04    | 0.40 | 0.48        | down |
| C8H8O2   | 4-Hydroxyacetophenone*                  | Phenolic acids              | 1.21E+05 | 1.21E+05 | 1.07 | 0.26    | 0.55 | 0.40        | down |
| C8H8O2   | Phenyl acetate*                         | Phenolic acids              | 1.13E+05 | 1.13E+05 | 1.23 | 0.22    | 0.53 | 0.38        | down |
| C5H8O5   | L-Citramalic acid                       | Organic acids               | 8.63E+05 | 8.63E+05 | 1.12 | 0.18    | 0.50 | 2.46        | up   |
| C10H12O2 | Ethyl phenylacetate                     | Phenolic acids              | 1.47E+05 | 1.47E+05 | 1.59 | 0.06    | 0.40 | 5.65        | up   |
| C10H9NO2 | 1-Methoxyindole-3-carbaldehyde          | Alkaloids                   | 1.57E+04 | 1.57E+04 | 1.66 | 0.02    | 0.39 | 0.00        | down |

|            |                                           |                             |          |          |      |      |      |          |      |
|------------|-------------------------------------------|-----------------------------|----------|----------|------|------|------|----------|------|
| C10H8O3    | 7-Methoxycoumarin                         | Lignans and Coumarins       | 5.30E+05 | 5.30E+05 | 1.03 | 0.20 | 0.52 | 0.48     | down |
| C11H12O2   | Ethyl cinnamate                           | Phenolic acids              | 1.51E+04 | 1.51E+04 | 1.55 | 0.03 | 0.40 | 2.47     | up   |
| C9H8O4     | Caffeic acid                              | Phenolic acids              | 3.85E+06 | 3.85E+06 | 1.07 | 0.24 | 0.54 | 0.35     | down |
| C7H12N2O4  | N-Acetyl-L-Glutamine                      | Amino acids and derivatives | 9.00E+00 | 9.00E+00 | 1.66 | 0.02 | 0.39 | 9088.67  | up   |
| C10H9NO3   | 5-Hydroxyindole-3-acetic acid             | Alkaloids                   | 6.50E+04 | 6.50E+04 | 1.57 | 0.02 | 0.39 | 2.19     | up   |
| C12H24O3   | 12-Hydroxydodecanoic acid                 | Lipids                      | 4.34E+04 | 4.34E+04 | 1.66 | 0.05 | 0.40 | 0.00     | down |
| C12H22O4   | Dodecanedioic acid                        | Organic acids               | 4.89E+03 | 4.89E+03 | 1.52 | 0.01 | 0.39 | 0.32     | down |
| C10H22N2O4 | L-Lysine-Butanoic Acid                    | Amino acids and derivatives | 9.00E+00 | 9.00E+00 | 1.66 | 0.04 | 0.40 | 6655.19  | up   |
| C9H13N3O5  | Cytarabine                                | Nucleotides and derivatives | 2.83E+06 | 2.83E+06 | 1.58 | 0.03 | 0.40 | 0.43     | down |
| C9H12N2O6  | Uridine                                   | Nucleotides and derivatives | 1.29E+06 | 1.29E+06 | 1.34 | 0.06 | 0.40 | 0.43     | down |
| C10H13N5O3 | 2'-Deoxyadenosine                         | Nucleotides and derivatives | 4.04E+05 | 4.04E+05 | 1.24 | 0.16 | 0.49 | 0.48     | down |
| C9H17NO6S  | S-Ribosyl-L-homocysteine                  | Amino acids and derivatives | 1.45E+06 | 1.45E+06 | 1.58 | 0.04 | 0.40 | 0.36     | down |
| C10H13N5O4 | Vidarabine*                               | Others                      | 2.78E+06 | 2.78E+06 | 1.64 | 0.02 | 0.39 | 0.34     | down |
| C10H13N5O4 | Adenosine*                                | Nucleotides and derivatives | 2.78E+06 | 2.78E+06 | 1.57 | 0.05 | 0.40 | 0.39     | down |
| C15H10O5   | Apigenin; 4',5,7-Trihydroxyflavone        | Flavonoids                  | 5.47E+04 | 5.47E+04 | 1.51 | 0.07 | 0.41 | 3.22     | up   |
| C15H10O5   | 3,5,7-Trihydroxyflavone                   | Flavonoids                  | 1.01E+05 | 1.01E+05 | 1.60 | 0.02 | 0.40 | 2.95     | up   |
| C15H14O5   | Phloretin                                 | Flavonoids                  | 5.78E+05 | 5.78E+05 | 1.45 | 0.05 | 0.40 | 2.10     | up   |
| C14H17NO5  | 4-(Rhamnosyloxy)phenylacetone nitrile     | Alkaloids                   | 3.40E+05 | 3.40E+05 | 1.58 | 0.02 | 0.39 | 0.36     | down |
| C13H12O7   | p-Coumaroylmalic acid                     | Phenolic acids              | 1.92E+05 | 1.92E+05 | 1.05 | 0.19 | 0.51 | 0.35     | down |
| C10H13N5O5 | Guanosine                                 | Nucleotides and derivatives | 7.61E+06 | 7.61E+06 | 1.50 | 0.01 | 0.39 | 0.37     | down |
| C17H17NO3  | p-Coumaroyltyramine                       | Alkaloids                   | 9.00E+00 | 9.00E+00 | 1.66 | 0.01 | 0.39 | 30782.22 | up   |
| C17H16O4   | Phenethyl caffeate                        | Phenolic acids              | 6.37E+04 | 6.37E+04 | 1.46 | 0.09 | 0.44 | 3.51     | up   |
| C15H10O6   | Isoscutellarein*                          | Flavonoids                  | 2.41E+04 | 2.41E+04 | 1.59 | 0.04 | 0.40 | 2.83     | up   |
| C15H10O6   | 2'-Hydroxygenistein*                      | Flavonoids                  | 1.98E+04 | 1.98E+04 | 1.35 | 0.04 | 0.40 | 3.73     | up   |
| C15H10O6   | Luteolin (5,7,3',4'-Tetrahydroxyflavone)* | Flavonoids                  | 1.98E+04 | 1.98E+04 | 1.35 | 0.04 | 0.40 | 3.73     | up   |
| C18H30O3   | 17-Hydroxylinolenic acid                  | Lipids                      | 1.59E+05 | 1.59E+05 | 1.02 | 0.30 | 0.57 | 2.38     | up   |

|             |                                                     |                             |          |          |      |      |      |      |      |
|-------------|-----------------------------------------------------|-----------------------------|----------|----------|------|------|------|------|------|
| C18H3003    | 9-Oxo-10E,12Z-octadecadienoic acid                  | Lipids                      | 8.22E+04 | 8.22E+04 | 1.32 | 0.22 | 0.53 | 0.41 | down |
| C13H1208    | 2-O-Caffeoylmalic acid                              | Phenolic acids              | 4.60E+05 | 4.60E+05 | 1.37 | 0.17 | 0.50 | 0.16 | down |
| C18H3403    | Ricinoleic acid                                     | Lipids                      | 7.69E+04 | 7.69E+04 | 1.17 | 0.28 | 0.55 | 2.63 | up   |
| C20H420     | 1-Eicosanol                                         | Lipids                      | 7.44E+04 | 7.44E+04 | 1.18 | 0.27 | 0.55 | 2.64 | up   |
| C17H3404    | 1-Monomyristin                                      | Lipids                      | 2.68E+05 | 2.68E+05 | 1.49 | 0.01 | 0.39 | 2.73 | up   |
| C10H17N3O6S | Glutathione reduced form                            | Amino acids and derivatives | 5.30E+05 | 5.30E+05 | 1.34 | 0.12 | 0.46 | 2.17 | up   |
| C18H3204    | 13S-Hydroperoxy-9Z,11E-octadecadienoic acid         | Lipids                      | 6.09E+04 | 6.09E+04 | 1.37 | 0.14 | 0.47 | 2.58 | up   |
| C18H3404    | Hydroxy ricinoleic acid                             | Lipids                      | 1.12E+05 | 1.12E+05 | 1.59 | 0.00 | 0.27 | 2.90 | up   |
| C16H1207    | Isorhamnetin                                        | Flavonoids                  | 4.32E+05 | 4.32E+05 | 1.56 | 0.03 | 0.40 | 3.51 | up   |
| C11H19N3O6S | S-(Methyl)glutathione                               | Amino acids and derivatives | 1.02E+05 | 1.02E+05 | 1.21 | 0.06 | 0.40 | 0.49 | down |
| C18H29NO4   | (-)-Jasmonoyl-L-Isoleucine                          | Organic acids               | 7.80E+04 | 7.80E+04 | 1.13 | 0.14 | 0.47 | 0.38 | down |
| C20H3603    | Ethyl 9-Hydroxy-10,12-octadecadienoic acid          | Lipids                      | 6.57E+04 | 6.57E+04 | 1.16 | 0.25 | 0.55 | 0.37 | down |
| C20H39NO2   | N-Oleoylethanolamine                                | Alkaloids                   | 4.11E+05 | 4.11E+05 | 1.14 | 0.26 | 0.55 | 0.39 | down |
| C15H1808    | (2E)-3-[4-(β-D-glucopyranoside)-phenylacrylic]-acid | Phenolic acids              | 5.72E+04 | 5.72E+04 | 1.15 | 0.13 | 0.47 | 2.29 | up   |
| C15H1808    | Phenylpropionic acid-O-β-D-glucopyranoside          | Phenolic acids              | 5.72E+04 | 5.72E+04 | 1.15 | 0.13 | 0.47 | 2.29 | up   |
| C20H2204    | (+)-trans-1,2-dihydrodehydroguaiaretic acid         | Lignans and Coumarins       | 3.76E+03 | 3.76E+03 | 1.44 | 0.08 | 0.41 | 4.71 | up   |
| C18H3205    | 9,12,13-Trihydroxy-10,15-octadecadienoic acid       | Lipids                      | 1.57E+05 | 1.57E+05 | 1.59 | 0.03 | 0.40 | 0.21 | down |
| C10H12N5O6P | Cyclic 3',5'-Adenylic acid                          | Nucleotides and derivatives | 1.48E+05 | 1.48E+05 | 1.60 | 0.03 | 0.40 | 0.39 | down |
| C14H1809    | 5-Glucosyloxy-2-Hydroxybenzoic acid methyl ester*   | Phenolic acids              | 1.71E+05 | 1.71E+05 | 1.47 | 0.02 | 0.39 | 0.47 | down |
| C15H1809    | 1-O-Caffeoyl-β-D-glucose*                           | Phenolic acids              | 3.52E+05 | 3.52E+05 | 1.14 | 0.35 | 0.59 | 0.42 | down |
| C18H1607    | 4',5-Dihydroxy-3',6,7-trimethoxyflavone             | Flavonoids                  | 1.04E+04 | 1.04E+04 | 1.42 | 0.10 | 0.46 | 0.04 | down |
| C10H12N5O7P | Guanosine 3',5'-cyclic monophosphate                | Nucleotides and derivatives | 4.38E+05 | 4.38E+05 | 1.31 | 0.14 | 0.47 | 0.27 | down |
| C21H3804    | 1-Monolinolein                                      | Lipids                      | 1.99E+05 | 1.99E+05 | 1.66 | 0.11 | 0.46 | 0.00 | down |
| C20H2007    | 4',5,6,7,8-Pentamethoxyflavone                      | Flavonoids                  | 5.67E+04 | 5.67E+04 | 1.53 | 0.11 | 0.46 | 0.18 | down |
| C18H2809    | 5'-Glucosyloxyjasmanic acid                         | Phenolic acids              | 4.80E+04 | 4.80E+04 | 1.12 | 0.12 | 0.46 | 2.28 | up   |
| C21H2208    | 5,6,7,8,3',4'-Hexamethoxyflavone                    | Flavonoids                  | 7.84E+04 | 7.84E+04 | 1.22 | 0.32 | 0.58 | 0.17 | down |

|               |                                                               |                             |          |          |      |      |      |      |      |
|---------------|---------------------------------------------------------------|-----------------------------|----------|----------|------|------|------|------|------|
| C12H23O14P    | Trehalose 6-phosphate                                         | Others                      | 7.50E+04 | 7.50E+04 | 1.44 | 0.02 | 0.39 | 0.45 | down |
| C19H40NO7P    | LysoPE 14:0(2n isomer)                                        | Lipids                      | 1.71E+05 | 1.71E+05 | 1.45 | 0.10 | 0.46 | 0.33 | down |
| C19H40NO7P    | LysoPE 14:0                                                   | Lipids                      | 1.45E+05 | 1.45E+05 | 1.40 | 0.10 | 0.45 | 0.42 | down |
| C10H15N5O10P2 | Adenosine 5'-diphosphate                                      | Nucleotides and derivatives | 3.24E+04 | 3.24E+04 | 1.18 | 0.26 | 0.55 | 3.51 | up   |
| C22H22O9      | Formononetin-7-O-glycoside (Ononin)                           | Flavonoids                  | 2.62E+04 | 2.62E+04 | 1.66 | 0.06 | 0.40 | 0.00 | down |
| C20H40NO7P    | LysoPE 15:1(2n isomer)                                        | Lipids                      | 4.06E+04 | 4.06E+04 | 1.40 | 0.04 | 0.40 | 0.42 | down |
| C21H20O11     | Kaempferol-4'-O-glucoside*                                    | Flavonoids                  | 9.33E+05 | 9.33E+05 | 1.62 | 0.03 | 0.40 | 3.32 | up   |
| C21H22O11     | Dihydrokaempferol-7-O-glucoside*                              | Flavonoids                  | 7.65E+05 | 7.65E+05 | 1.18 | 0.21 | 0.52 | 0.32 | down |
| C21H22O11     | Eriodictyol-3'-O-glucoside*                                   | Flavonoids                  | 7.53E+05 | 7.53E+05 | 1.26 | 0.18 | 0.50 | 0.32 | down |
| C23H20O10     | Cinnamoylferuloyltartaric acid                                | Phenolic acids              | 3.73E+04 | 3.73E+04 | 1.41 | 0.07 | 0.41 | 2.00 | up   |
| C30H48O3      | (23S)-3 $\beta$ -hydroxydammar-21-oic acid 21,23-lactone      | Terpenoids                  | 6.24E+03 | 6.24E+03 | 1.63 | 0.26 | 0.55 | 0.00 | down |
| C22H44NO7P    | LysoPE 17:1(2n isomer)                                        | Lipids                      | 1.10E+05 | 1.10E+05 | 1.41 | 0.11 | 0.46 | 0.49 | down |
| C22H46NO7P    | LysoPC 14:0                                                   | Lipids                      | 1.04E+06 | 1.04E+06 | 1.51 | 0.09 | 0.44 | 0.29 | down |
| C29H41NO4     | O-Acetyljervine                                               | Alkaloids                   | 1.05E+06 | 1.05E+06 | 1.47 | 0.12 | 0.46 | 0.32 | down |
| C22H22O12     | Isotamarixin                                                  | Flavonoids                  | 2.75E+05 | 2.75E+05 | 1.31 | 0.19 | 0.51 | 2.40 | up   |
| C23H46NO7P    | LysoPC 15:1                                                   | Lipids                      | 2.71E+05 | 2.71E+05 | 1.61 | 0.04 | 0.40 | 0.41 | down |
| C23H48NO7P    | LysoPC 15:0(2n isomer)                                        | Lipids                      | 1.97E+05 | 1.97E+05 | 1.01 | 0.30 | 0.57 | 0.46 | down |
| C23H48NO7P    | LysoPC 15:0                                                   | Lipids                      | 1.41E+06 | 1.41E+06 | 1.37 | 0.11 | 0.46 | 0.49 | down |
| C30H46O5      | 2 $\alpha$ ,19 $\alpha$ -Dihydroxy-3-oxours-12-en-28-oic acid | Terpenoids                  | 8.27E+05 | 8.27E+05 | 1.16 | 0.23 | 0.53 | 2.29 | up   |
| C24H48NO7P    | LysoPC 16:1(2n isomer)                                        | Lipids                      | 1.58E+06 | 1.58E+06 | 1.38 | 0.13 | 0.47 | 0.28 | down |
| C22H22O13     | Mearnsetin-3-O-glucoside                                      | Flavonoids                  | 1.24E+06 | 1.24E+06 | 1.12 | 0.32 | 0.58 | 0.34 | down |
| C18H32O16     | D-Panose                                                      | Others                      | 3.05E+05 | 3.05E+05 | 1.45 | 0.02 | 0.39 | 0.19 | down |
| C18H32O16     | Maltotriose                                                   | Others                      | 1.24E+06 | 1.24E+06 | 1.47 | 0.06 | 0.40 | 0.22 | down |
| C25H48NO7P    | LysoPC 17:2                                                   | Lipids                      | 2.72E+05 | 2.72E+05 | 1.15 | 0.25 | 0.55 | 0.42 | down |
| C25H52NO7P    | LysoPC 17:0                                                   | Lipids                      | 2.63E+05 | 2.63E+05 | 1.48 | 0.14 | 0.47 | 0.33 | down |
| C27H46O9      | 1- $\alpha$ -Linolenoyl-glycerol-3-O-glucoside                | Lipids                      | 4.82E+05 | 4.82E+05 | 1.57 | 0.02 | 0.39 | 0.21 | down |

|               |                                                         |                             |          |          |      |      |      |      |      |
|---------------|---------------------------------------------------------|-----------------------------|----------|----------|------|------|------|------|------|
| C27H48O9      | 1-Linoleoylglycerol-3-O-glucoside                       | Lipids                      | 1.08E+05 | 1.08E+05 | 1.27 | 0.16 | 0.49 | 0.33 | down |
| C26H50NO7P    | LysoPC 18:2(2n isomer)                                  | Lipids                      | 7.92E+06 | 7.92E+06 | 1.49 | 0.05 | 0.40 | 0.45 | down |
| C26H32O11     | Matairesinol-4'-O-glucoside                             | Lignans and Coumarins       | 4.94E+05 | 4.94E+05 | 1.29 | 0.14 | 0.47 | 2.30 | up   |
| C14H22N2O16P2 | Uridine-5'-Diphosphate-D-Xylose                         | Nucleotides and derivatives | 6.12E+04 | 6.12E+04 | 1.41 | 0.11 | 0.46 | 2.48 | up   |
| C28H50NO7P    | LysoPC 20:4                                             | Lipids                      | 5.99E+04 | 5.99E+04 | 1.61 | 0.36 | 0.59 | 0.00 | down |
| C29H39N3O8    | N1,N8-Bis(sinapoyl)spermidine                           | Alkaloids                   | 4.00E+05 | 4.00E+05 | 1.26 | 0.05 | 0.40 | 0.48 | down |
| C26H26O14     | Sinapoylsinapoyltartaric acid                           | Phenolic acids              | 1.61E+04 | 1.61E+04 | 1.67 | 0.00 | 0.25 | 0.00 | down |
| C29H36O13     | Medioresinol-4'-O-(6"-acetyl)glucoside                  | Lignans and Coumarins       | 4.30E+04 | 4.30E+04 | 1.43 | 0.11 | 0.46 | 0.37 | down |
| C30H38O14     | Syringaresinol-4'-O-(6"-acetyl)glucoside                | Lignans and Coumarins       | 1.07E+06 | 1.07E+06 | 1.22 | 0.07 | 0.41 | 0.43 | down |
| C24H42O21     | Nystose                                                 | Others                      | 6.38E+04 | 6.38E+04 | 1.04 | 0.00 | 0.37 | 0.14 | down |
| C24H42O21     | D-Maltotetraose                                         | Others                      | 9.17E+04 | 9.17E+04 | 1.31 | 0.10 | 0.46 | 0.18 | down |
| C24H42O21     | Stachyose                                               | Others                      | 3.31E+05 | 3.31E+05 | 1.50 | 0.03 | 0.40 | 0.22 | down |
| C33H56O14     | Gingerglycolipid A                                      | Lipids                      | 3.05E+06 | 3.05E+06 | 1.50 | 0.08 | 0.41 | 0.37 | down |
| C33H56O14     | 1- $\alpha$ -Linolenoyl-glycerol-2,3-di-O-glucoside     | Lipids                      | 6.52E+05 | 6.52E+05 | 1.49 | 0.07 | 0.41 | 0.42 | down |
| C33H56O14     | 1-Linolenoyl-rac-glycerol-diglucoside                   | Lipids                      | 2.21E+06 | 2.21E+06 | 1.63 | 0.01 | 0.39 | 0.42 | down |
| C33H56O14     | 2- $\alpha$ -Linolenoyl-glycerol-1,3-di-O-glucoside     | Lipids                      | 3.95E+05 | 3.95E+05 | 1.39 | 0.13 | 0.47 | 0.38 | down |
| C34H30O15     | 3,4,5-Tricaffeoylquinic acid                            | Phenolic acids              | 4.03E+06 | 4.03E+06 | 1.44 | 0.01 | 0.39 | 0.30 | down |
| C31H34O17     | 1,5-O-dicaffeoyl-3-O-glucoside-quinic acid              | Phenolic acids              | 3.97E+06 | 3.97E+06 | 1.35 | 0.03 | 0.40 | 0.36 | down |
| C33H58O14     | Gingerglycolipid B                                      | Lipids                      | 3.12E+05 | 3.12E+05 | 1.38 | 0.12 | 0.46 | 0.36 | down |
| C38H60O10     | 3-O-(2-O-Acetyl-glucosyl)oleanolic acid                 | Terpenoids                  | 2.33E+06 | 2.33E+06 | 1.20 | 0.17 | 0.50 | 0.43 | down |
| C33H60O14     | Gingerglycolipid C                                      | Lipids                      | 2.83E+04 | 2.83E+04 | 1.23 | 0.25 | 0.55 | 0.38 | down |
| C30H32O20     | Quercetin-7-O-(6"-malonyl)glucosyl-5-O-glucoside        | Flavonoids                  | 2.95E+04 | 2.95E+04 | 1.27 | 0.02 | 0.39 | 0.14 | down |
| C38H34O19     | 3,5-Di-O-caffeoyl-1-O-(2-O-caffeoylmaloyl)-quinic acid  | Phenolic acids              | 7.55E+07 | 7.55E+07 | 1.13 | 0.08 | 0.41 | 0.49 | down |
| C35H38O21     | 3,5-Di-O-caffeoyl-1-O-(2-O-glucosylmaloyl)-quinic acid* | Phenolic acids              | 1.32E+06 | 1.32E+06 | 1.20 | 0.05 | 0.40 | 0.38 | down |
| C35H38O21     | 3,5-Di-O-caffeoyl-1-O-(4-O-glucosylmaloyl)-quinic acid* | Phenolic acids              | 1.32E+06 | 1.32E+06 | 1.20 | 0.05 | 0.40 | 0.38 | down |
| C30H52O26     | Verbascose                                              | Others                      | 6.97E+04 | 6.97E+04 | 1.33 | 0.18 | 0.50 | 0.12 | down |



**Table S5.** Variation of differential metabolite expression content in group T2 vs T4.

| Formula   | Compounds                        | Class                       | T2       | T4       | VIP  | p_value | FDR  | Fold_Change | Type |
|-----------|----------------------------------|-----------------------------|----------|----------|------|---------|------|-------------|------|
| C3H7NO2   | N-Methylglycine                  | Amino acids and derivatives | 4.67E+03 | 4.67E+03 | 1.25 | 0.10    | 0.28 | 3.60        | up   |
| C3H7NO3   | L-Serine                         | Amino acids and derivatives | 8.39E+04 | 8.39E+04 | 1.40 | 0.00    | 0.15 | 3.04        | up   |
| C5H10O3   | $\beta$ -Hydroxyisovaleric acid  | Organic acids               | 1.78E+06 | 1.78E+06 | 1.08 | 0.11    | 0.29 | 0.49        | down |
| C8H9N     | N-Benzylmethylene isomethylamine | Alkaloids                   | 1.05E+07 | 1.05E+07 | 1.38 | 0.07    | 0.25 | 2.13        | up   |
| C8H8O     | (S)-2-Phenyloxirane              | Others                      | 1.37E+07 | 1.37E+07 | 1.01 | 0.18    | 0.36 | 0.32        | down |
| C6H6N2O   | Nicotinamide                     | Others                      | 1.09E+06 | 1.09E+06 | 1.36 | 0.05    | 0.24 | 0.41        | down |
| C6H11NO2  | L-Pipecolic Acid                 | Organic acids               | 2.38E+07 | 2.38E+07 | 1.46 | 0.01    | 0.15 | 2.05        | up   |
| C6H14N2O  | N-Acetylputrescine               | Alkaloids                   | 2.98E+05 | 2.98E+05 | 1.29 | 0.01    | 0.15 | 2.25        | up   |
| C4H9N3O2  | 3-Guanidinopropionic acid        | Organic acids               | 3.14E+04 | 3.14E+04 | 1.33 | 0.08    | 0.26 | 3.26        | up   |
| C8H8O2    | 4-Hydroxyacetophenone*           | Phenolic acids              | 1.21E+05 | 1.21E+05 | 1.10 | 0.22    | 0.39 | 0.33        | down |
| C8H8O2    | Benzoic acid methyl ester        | Phenolic acids              | 9.00E+00 | 9.00E+00 | 1.04 | 0.18    | 0.36 | 2773.30     | up   |
| C8H8O2    | Phenyl acetate*                  | Phenolic acids              | 1.13E+05 | 1.13E+05 | 1.21 | 0.20    | 0.37 | 0.33        | down |
| C9H12O    | (Ethoxymethyl)benzene            | Others                      | 8.83E+04 | 8.83E+04 | 1.47 | 0.03    | 0.22 | 0.00        | down |
| C8H11NO   | L-Tyramine                       | Alkaloids                   | 1.48E+07 | 1.48E+07 | 1.30 | 0.13    | 0.31 | 0.07        | down |
| C5H8O5    | 2-Hydroxyglutaric Acid*          | Organic acids               | 4.87E+05 | 4.87E+05 | 1.35 | 0.03    | 0.21 | 2.30        | up   |
| C5H8O5    | 2-Dehydro-3-deoxy-L-arabinonate* | Others                      | 4.79E+05 | 4.79E+05 | 1.43 | 0.01    | 0.15 | 2.35        | up   |
| C5H8O5    | L-Citramalic acid                | Organic acids               | 8.63E+05 | 8.63E+05 | 1.20 | 0.05    | 0.25 | 2.48        | up   |
| C10H12O   | 2',4'-Dimethylacetophenone       | Others                      | 1.28E+05 | 1.28E+05 | 1.47 | 0.01    | 0.15 | 0.00        | down |
| C10H12O   | Mesitaldehyde                    | Others                      | 1.28E+05 | 1.28E+05 | 1.47 | 0.01    | 0.15 | 0.00        | down |
| C8H7NO2   | 4-Hydroxymandelonitrile          | Alkaloids                   | 2.42E+06 | 2.42E+06 | 1.29 | 0.13    | 0.31 | 2.77        | up   |
| C5H11NO2S | L-Methionine                     | Amino acids and derivatives | 2.29E+06 | 2.29E+06 | 1.25 | 0.13    | 0.32 | 2.57        | up   |
| C10H12N2  | Tryptamine                       | Alkaloids                   | 7.44E+05 | 7.44E+05 | 1.41 | 0.06    | 0.25 | 0.25        | down |
| C6H11NO4  | N-Acetyl-L-threonine             | Amino acids and derivatives | 1.04E+05 | 1.04E+05 | 1.27 | 0.10    | 0.28 | 2.67        | up   |

|            |                                               |                             |          |          |      |      |      |           |      |
|------------|-----------------------------------------------|-----------------------------|----------|----------|------|------|------|-----------|------|
| C6H10O5    | 3-Hydroxy-3-methylpentane-1,5-dioic acid      | Amino acids and derivatives | 1.72E+06 | 1.72E+06 | 1.36 | 0.02 | 0.20 | 2.84      | up   |
| C9H11NO2   | L-Phenylalanine                               | Amino acids and derivatives | 1.74E+07 | 1.74E+07 | 1.40 | 0.05 | 0.25 | 2.12      | up   |
| C8H15NO3   | N-Acetyl-L-leucine                            | Amino acids and derivatives | 1.50E+05 | 1.50E+05 | 1.39 | 0.07 | 0.25 | 2.90      | up   |
| C6H9NO5    | N-Acetyl-L-Aspartic Acid                      | Amino acids and derivatives | 5.18E+04 | 5.18E+04 | 1.35 | 0.04 | 0.23 | 3.80      | up   |
| C6H8O6     | D-Glucurono-6,3-lactone                       | Others                      | 3.09E+04 | 3.09E+04 | 1.47 | 0.02 | 0.21 | 0.00      | down |
| C10H8O3    | 7-Methoxycoumarin                             | Lignans and Coumarins       | 5.30E+05 | 5.30E+05 | 1.13 | 0.14 | 0.32 | 0.35      | down |
| C6H5N5O2   | Isoxanthopterin                               | Nucleotides and derivatives | 2.21E+05 | 2.21E+05 | 1.41 | 0.01 | 0.17 | 0.49      | down |
| C7H12N2O4  | N-Acetyl-L-Glutamine                          | Amino acids and derivatives | 9.00E+00 | 9.00E+00 | 1.47 | 0.07 | 0.26 | 376840.74 | up   |
| C7H11NO5   | N-Acetyl-L-glutamic acid                      | Amino acids and derivatives | 3.62E+05 | 3.62E+05 | 1.27 | 0.09 | 0.28 | 3.00      | up   |
| C6H10O7    | D-Glucuronic acid                             | Others                      | 1.43E+05 | 1.43E+05 | 1.46 | 0.00 | 0.11 | 2.46      | up   |
| C4H9O7P    | D-Erythrose-4-phosphate                       | Others                      | 4.45E+04 | 4.45E+04 | 1.24 | 0.09 | 0.28 | 2.44      | up   |
| C11H12O4   | Sinapinaldehyde                               | Phenolic acids              | 3.01E+05 | 3.01E+05 | 1.44 | 0.01 | 0.15 | 2.53      | up   |
| C12H24O3   | 12-Hydroxydodecanoic acid                     | Lipids                      | 4.34E+04 | 4.34E+04 | 1.47 | 0.05 | 0.24 | 0.00      | down |
| C15H24O    | Santalol                                      | Others                      | 8.26E+05 | 8.26E+05 | 1.47 | 0.03 | 0.21 | 0.00      | down |
| C11H13NO4  | N-Acetyl-L-tyrosine                           | Amino acids and derivatives | 5.67E+04 | 5.67E+04 | 1.46 | 0.01 | 0.15 | 9.88      | up   |
| C12H22O4   | Dodecanedioic acid                            | Organic acids               | 4.89E+03 | 4.89E+03 | 1.40 | 0.00 | 0.15 | 0.37      | down |
| C15H24O2   | Baimuxinal                                    | Terpenoids                  | 5.69E+04 | 5.69E+04 | 1.09 | 0.12 | 0.31 | 0.15      | down |
| C10H14N2O5 | Thymidine                                     | Nucleotides and derivatives | 5.85E+04 | 5.85E+04 | 1.17 | 0.18 | 0.36 | 0.46      | down |
| C9H13N3O5  | Cytidine                                      | Nucleotides and derivatives | 1.66E+05 | 1.66E+05 | 1.45 | 0.01 | 0.15 | 0.34      | down |
| C9H13N3O5  | Cytarabine                                    | Nucleotides and derivatives | 2.83E+06 | 2.83E+06 | 1.39 | 0.02 | 0.20 | 0.34      | down |
| C9H12N2O6  | Uridine                                       | Nucleotides and derivatives | 1.29E+06 | 1.29E+06 | 1.38 | 0.05 | 0.25 | 0.32      | down |
| C10H13N5O3 | 2'-Deoxyadenosine                             | Nucleotides and derivatives | 4.04E+05 | 4.04E+05 | 1.20 | 0.13 | 0.31 | 0.40      | down |
| C15H12O4   | Pinocembrin (Dihydrochrysin)                  | Flavonoids                  | 3.12E+04 | 3.12E+04 | 1.39 | 0.01 | 0.16 | 0.42      | down |
| C8H20NO6P  | Choline Alfoscerate                           | Lipids                      | 7.97E+05 | 7.97E+05 | 1.29 | 0.01 | 0.17 | 3.85      | up   |
| C14H18N2O3 | L-Prolyl-L-Phenylalanine                      | Amino acids and derivatives | 3.92E+05 | 3.92E+05 | 1.34 | 0.03 | 0.22 | 2.11      | up   |
| C16H12O4   | Formononetin (7-Hydroxy-4'-methoxyisoflavone) | Flavonoids                  | 1.52E+04 | 1.52E+04 | 1.33 | 0.05 | 0.24 | 0.38      | down |

|             |                                                       |                             |          |          |      |      |      |         |      |
|-------------|-------------------------------------------------------|-----------------------------|----------|----------|------|------|------|---------|------|
| C10H12N4O5  | 9-(Arabinosyl)hypoxanthine                            | Nucleotides and derivatives | 3.12E+05 | 3.12E+05 | 1.42 | 0.00 | 0.15 | 0.31    | down |
| C18H30O2    | $\alpha$ -Linolenic Acid                              | Lipids                      | 2.58E+07 | 2.58E+07 | 1.35 | 0.08 | 0.27 | 0.48    | down |
| C18H30O2    | $\gamma$ -Linolenic Acid                              | Lipids                      | 4.90E+05 | 4.90E+05 | 1.41 | 0.05 | 0.24 | 0.46    | down |
| C18H30O2    | Crepenynic acid                                       | Lipids                      | 5.02E+05 | 5.02E+05 | 1.39 | 0.06 | 0.25 | 0.46    | down |
| C10H13N5O5  | Guanosine                                             | Nucleotides and derivatives | 7.61E+06 | 7.61E+06 | 1.43 | 0.02 | 0.20 | 0.41    | down |
| C16H12O5    | Apigenin 7-methyl ether*                              | Flavonoids                  | 4.39E+05 | 4.39E+05 | 1.45 | 0.01 | 0.16 | 0.43    | down |
| C16H12O5    | Acacetin*                                             | Flavonoids                  | 4.27E+05 | 4.27E+05 | 1.41 | 0.01 | 0.15 | 0.41    | down |
| C16H12O5    | Prunetin (5,4'-Dihydroxy-7-methoxyisoflavone)         | Flavonoids                  | 4.49E+05 | 4.49E+05 | 1.44 | 0.01 | 0.15 | 0.40    | down |
| C16H12O5    | 5,7-Dihydroxy-8-Methoxyflavone*                       | Flavonoids                  | 5.61E+05 | 5.61E+05 | 1.45 | 0.00 | 0.15 | 0.42    | down |
| C15H17N3O3  | Feruloylhistamine                                     | Alkaloids                   | 1.17E+04 | 1.17E+04 | 1.47 | 0.04 | 0.23 | 0.00    | down |
| C16H32O4    | 10,16-Dihydroxypalmitic acid                          | Lipids                      | 3.55E+04 | 3.55E+04 | 1.22 | 0.15 | 0.33 | 0.46    | down |
| C17H23NO3   | L-Hyoscyamine                                         | Alkaloids                   | 3.11E+04 | 3.11E+04 | 1.08 | 0.04 | 0.23 | 0.37    | down |
| C18H30O3    | 17-Hydroxylinolenic acid                              | Lipids                      | 1.59E+05 | 1.59E+05 | 1.05 | 0.21 | 0.38 | 2.75    | up   |
| C18H30O3    | 2R-hydroxy-9Z,12Z,15Z-octadecatrienoic acid           | Lipids                      | 1.03E+05 | 1.03E+05 | 1.11 | 0.26 | 0.43 | 3.57    | up   |
| C18H30O3    | 9-Oxo-10E,12Z-octadecadienoic acid                    | Lipids                      | 8.22E+04 | 8.22E+04 | 1.20 | 0.18 | 0.36 | 0.32    | down |
| C8H14N3O7P  | 5-Aminoimidazole ribonucleotide                       | Nucleotides and derivatives | 1.33E+06 | 1.33E+06 | 1.33 | 0.01 | 0.15 | 4.08    | up   |
| C18H34O3    | Ricinoleic acid                                       | Lipids                      | 7.69E+04 | 7.69E+04 | 1.22 | 0.20 | 0.37 | 3.25    | up   |
| C20H42O     | 1-Eicosanol                                           | Lipids                      | 7.44E+04 | 7.44E+04 | 1.25 | 0.16 | 0.34 | 3.09    | up   |
| C18H36O3    | 12-Hydroxyoctadecanoic acid                           | Lipids                      | 2.54E+04 | 2.54E+04 | 1.47 | 0.02 | 0.21 | 0.00    | down |
| C18H36O3    | 2R-Hydroxyoctadecanoic Acid                           | Lipids                      | 1.34E+04 | 1.34E+04 | 1.33 | 0.05 | 0.25 | 2.71    | up   |
| C15H14O7    | Epigallocatechin                                      | Flavonoids                  | 9.00E+00 | 9.00E+00 | 1.47 | 0.10 | 0.29 | 2647.89 | up   |
| C10H17N3O6S | Glutathione reduced form                              | Amino acids and derivatives | 5.30E+05 | 5.30E+05 | 1.38 | 0.01 | 0.18 | 2.05    | up   |
| C18H32O4    | 13S-Hydroperoxy-9Z,11E-octadecadienoic acid           | Lipids                      | 6.09E+04 | 6.09E+04 | 1.22 | 0.20 | 0.37 | 3.72    | up   |
| C18H34O4    | 12,13-DHOME; (9Z)-12,13-Dihydroxyoctadec-9-enoic acid | Lipids                      | 2.63E+04 | 2.63E+04 | 1.39 | 0.06 | 0.25 | 2.21    | up   |
| C13H16O9    | Protocatechuic acid-4-O-glucoside*                    | Phenolic acids              | 6.38E+06 | 6.38E+06 | 1.26 | 0.05 | 0.24 | 0.48    | down |
| C9H13N2O9P  | Uridine 5'-monophosphate                              | Nucleotides and derivatives | 1.31E+05 | 1.31E+05 | 1.41 | 0.05 | 0.25 | 0.27    | down |

|             |                                                                      |                             |          |          |      |      |      |      |      |
|-------------|----------------------------------------------------------------------|-----------------------------|----------|----------|------|------|------|------|------|
| C18H32O5    | 9,12,13-Trihydroxy-10,15-octadecadienoic acid                        | Lipids                      | 1.57E+05 | 1.57E+05 | 1.39 | 0.02 | 0.21 | 0.17 | down |
| C18H34O5    | 9,12,13-TriHOME; 9(S),12(S),13(S)-Trihydroxy-10(E)-octadecenoic acid | Lipids                      | 2.75E+04 | 2.75E+04 | 1.29 | 0.17 | 0.35 | 5.44 | up   |
| C6H14O12P2  | D-Glucose 1,6-bisphosphate                                           | Others                      | 6.49E+03 | 6.49E+03 | 1.21 | 0.10 | 0.29 | 3.06 | up   |
| C15H18O9    | 1-O-Caffeoyl-β-D-glucose*                                            | Phenolic acids              | 3.52E+05 | 3.52E+05 | 1.24 | 0.02 | 0.19 | 2.95 | up   |
| C18H16O7    | 4',5-Dihydroxy-3',6,7-trimethoxyflavone                              | Flavonoids                  | 1.04E+04 | 1.04E+04 | 1.33 | 0.14 | 0.32 | 0.20 | down |
| C10H12N5O7P | Guanosine 3',5'-cyclic monophosphate                                 | Nucleotides and derivatives | 4.38E+05 | 4.38E+05 | 1.39 | 0.10 | 0.29 | 0.09 | down |
| C14H18O10   | 1-O-(3,4-Dihydroxy-5-methoxy-benzoyl)-glucoside                      | Phenolic acids              | 2.56E+04 | 2.56E+04 | 1.46 | 0.02 | 0.20 | 5.73 | up   |
| C21H38O4    | 1-Monolinolein                                                       | Lipids                      | 1.99E+05 | 1.99E+05 | 1.39 | 0.13 | 0.31 | 0.10 | down |
| C16H16O10   | Scopoletin-7-O-glucuronide                                           | Lignans and Coumarins       | 2.75E+06 | 2.75E+06 | 1.28 | 0.04 | 0.23 | 2.30 | up   |
| C17H20O9    | Chlorogenic acid methyl ester                                        | Phenolic acids              | 4.64E+06 | 4.64E+06 | 1.25 | 0.03 | 0.21 | 2.02 | up   |
| C20H20O7    | 4',5,6,7,8-Pentamethoxyflavone                                       | Flavonoids                  | 5.67E+04 | 5.67E+04 | 1.21 | 0.17 | 0.35 | 0.36 | down |
| C19H40NO7P  | LysoPE 14:0(2n isomer)                                               | Lipids                      | 1.71E+05 | 1.71E+05 | 1.38 | 0.08 | 0.27 | 0.22 | down |
| C19H40NO7P  | LysoPE 14:0                                                          | Lipids                      | 1.45E+05 | 1.45E+05 | 1.38 | 0.06 | 0.25 | 0.25 | down |
| C20H30NO9+  | Caffeoylcholine-4-O-glucoside                                        | Alkaloids                   | 1.40E+05 | 1.40E+05 | 1.02 | 0.15 | 0.33 | 0.44 | down |
| C22H22O9    | 1-O-Feruloyl-3-O-caffeoylglycerol                                    | Lipids                      | 2.45E+06 | 2.45E+06 | 1.24 | 0.01 | 0.18 | 0.35 | down |
| C22H22O9    | Formononetin-7-O-glycoside (Ononin)                                  | Flavonoids                  | 2.62E+04 | 2.62E+04 | 1.47 | 0.06 | 0.25 | 0.00 | down |
| C20H18O11   | Quercetin-3-O-xyloside*                                              | Flavonoids                  | 8.64E+05 | 8.64E+05 | 1.44 | 0.00 | 0.15 | 2.13 | up   |
| C20H18O11   | Quercetin-3-O-α-L-arabinofuranoside*                                 | Flavonoids                  | 6.22E+05 | 6.22E+05 | 1.44 | 0.01 | 0.17 | 2.73 | up   |
| C20H40NO7P  | LysoPE 15:1(2n isomer)                                               | Lipids                      | 4.06E+04 | 4.06E+04 | 1.41 | 0.03 | 0.21 | 0.21 | down |
| C20H40NO7P  | LysoPE 15:1                                                          | Lipids                      | 3.12E+04 | 3.12E+04 | 1.22 | 0.03 | 0.21 | 0.46 | down |
| C20H42NO7P  | LysoPE 15:0                                                          | Lipids                      | 3.34E+05 | 3.34E+05 | 1.30 | 0.10 | 0.29 | 0.29 | down |
| C20H42NO7P  | LysoPE 15:0(2n isomer)                                               | Lipids                      | 3.17E+05 | 3.17E+05 | 1.34 | 0.08 | 0.27 | 0.28 | down |
| C21H22O11   | 6-C-Glucosyl-2-Hydroxynaringenin                                     | Flavonoids                  | 2.19E+07 | 2.19E+07 | 1.42 | 0.01 | 0.15 | 0.44 | down |
| C21H42NO7P  | LysoPE 16:1                                                          | Lipids                      | 3.21E+05 | 3.21E+05 | 1.25 | 0.08 | 0.27 | 0.30 | down |
| C21H42NO7P  | LysoPE 16:1(2n isomer)                                               | Lipids                      | 2.82E+05 | 2.82E+05 | 1.15 | 0.14 | 0.32 | 0.31 | down |
| C21H44NO7P  | LysoPE 16:0(2n isomer)                                               | Lipids                      | 2.77E+07 | 2.77E+07 | 1.35 | 0.04 | 0.24 | 0.43 | down |

|            |                                |                |          |          |      |      |      |      |      |
|------------|--------------------------------|----------------|----------|----------|------|------|------|------|------|
| C21H44NO7P | LysoPE 16:0                    | Lipids         | 3.02E+07 | 3.02E+07 | 1.36 | 0.05 | 0.25 | 0.40 | down |
| C23H20O10  | Cinnamoylferuloyltartaric acid | Phenolic acids | 3.73E+04 | 3.73E+04 | 1.47 | 0.02 | 0.20 | 0.00 | down |
| C19H27NO12 | Anthranilate-1-O-Sophoroside   | Phenolic acids | 4.52E+05 | 4.52E+05 | 1.14 | 0.30 | 0.47 | 5.49 | up   |
| C21H18O12  | Vnilloylcaffeoyltartaric acid  | Phenolic acids | 3.27E+04 | 3.27E+04 | 1.45 | 0.00 | 0.08 | 2.82 | up   |
| C22H44NO7P | LysoPE 17:1(2n isomer)         | Lipids         | 1.10E+05 | 1.10E+05 | 1.26 | 0.06 | 0.25 | 0.39 | down |
| C22H44NO7P | LysoPE 17:1                    | Lipids         | 1.21E+05 | 1.21E+05 | 1.37 | 0.05 | 0.25 | 0.37 | down |
| C21H22O12  | Taxifolin-3'-O-glucoside       | Flavonoids     | 1.54E+05 | 1.54E+05 | 1.15 | 0.06 | 0.25 | 2.48 | up   |
| C22H46NO7P | LysoPC 14:0                    | Lipids         | 1.04E+06 | 1.04E+06 | 1.40 | 0.08 | 0.26 | 0.20 | down |
| C29H41NO4  | O-Acetyljervine                | Alkaloids      | 1.05E+06 | 1.05E+06 | 1.38 | 0.09 | 0.28 | 0.21 | down |
| C23H42NO7P | LysoPE 18:3                    | Lipids         | 1.49E+07 | 1.49E+07 | 1.34 | 0.06 | 0.25 | 0.49 | down |
| C23H44NO7P | LysoPE 18:2                    | Lipids         | 1.99E+07 | 1.99E+07 | 1.24 | 0.08 | 0.27 | 0.47 | down |
| C23H44NO7P | LysoPE 18:2(2n isomer)         | Lipids         | 1.56E+07 | 1.56E+07 | 1.22 | 0.09 | 0.28 | 0.49 | down |
| C23H46NO7P | LysoPE 18:1                    | Lipids         | 2.17E+06 | 2.17E+06 | 1.34 | 0.07 | 0.25 | 0.40 | down |
| C23H46NO7P | LysoPC 15:1                    | Lipids         | 2.71E+05 | 2.71E+05 | 1.41 | 0.01 | 0.16 | 0.23 | down |
| C23H46NO7P | LysoPE 18:1(2n isomer)         | Lipids         | 1.32E+06 | 1.32E+06 | 1.36 | 0.07 | 0.25 | 0.35 | down |
| C23H48NO7P | LysoPE 18:0(2n isomer)         | Lipids         | 2.64E+04 | 2.64E+04 | 1.26 | 0.07 | 0.26 | 0.37 | down |
| C23H48NO7P | LysoPC 15:0(2n isomer)         | Lipids         | 1.97E+05 | 1.97E+05 | 1.14 | 0.22 | 0.38 | 0.31 | down |
| C23H48NO7P | LysoPE 18:0                    | Lipids         | 1.40E+05 | 1.40E+05 | 1.32 | 0.09 | 0.28 | 0.42 | down |
| C23H48NO7P | LysoPC 15:0                    | Lipids         | 1.41E+06 | 1.41E+06 | 1.36 | 0.06 | 0.25 | 0.29 | down |
| C24H46NO7P | LysoPC 16:2(2n isomer)         | Lipids         | 8.03E+04 | 8.03E+04 | 1.21 | 0.15 | 0.33 | 0.33 | down |
| C24H48NO7P | LysoPC 16:1                    | Lipids         | 1.06E+06 | 1.06E+06 | 1.20 | 0.10 | 0.28 | 0.32 | down |
| C24H48NO7P | LysoPC 16:1(2n isomer)         | Lipids         | 1.58E+06 | 1.58E+06 | 1.31 | 0.12 | 0.30 | 0.22 | down |
| C24H50NO7P | LysoPC 16:0(2n isomer)         | Lipids         | 8.75E+07 | 8.75E+07 | 1.41 | 0.02 | 0.18 | 0.45 | down |
| C24H50NO7P | LysoPC 16:0                    | Lipids         | 8.75E+07 | 8.75E+07 | 1.40 | 0.02 | 0.20 | 0.45 | down |
| C25H46NO7P | LysoPE 20:3(2n isomer)         | Lipids         | 4.44E+04 | 4.44E+04 | 1.37 | 0.06 | 0.25 | 0.29 | down |
| C25H46NO7P | LysoPE 20:3                    | Lipids         | 4.56E+04 | 4.56E+04 | 1.30 | 0.08 | 0.27 | 0.33 | down |

|            |                                                |                       |          |          |      |      |      |      |      |
|------------|------------------------------------------------|-----------------------|----------|----------|------|------|------|------|------|
| C25H48NO7P | LysoPE 20:2(2n isomer)                         | Lipids                | 6.38E+04 | 6.38E+04 | 1.27 | 0.12 | 0.31 | 0.34 | down |
| C25H48NO7P | LysoPC 17:2                                    | Lipids                | 2.72E+05 | 2.72E+05 | 1.10 | 0.21 | 0.38 | 0.35 | down |
| C25H48NO7P | LysoPE 20:2                                    | Lipids                | 7.39E+04 | 7.39E+04 | 1.27 | 0.14 | 0.32 | 0.31 | down |
| C23H22O13  | Quercetin-3-O-(6"-O-acetyl)galactoside         | Flavonoids            | 1.17E+05 | 1.17E+05 | 1.32 | 0.00 | 0.15 | 4.10 | up   |
| C25H50NO7P | LysoPC 17:1                                    | Lipids                | 4.27E+05 | 4.27E+05 | 1.32 | 0.06 | 0.25 | 0.34 | down |
| C25H52NO7P | LysoPC 17:0                                    | Lipids                | 2.63E+05 | 2.63E+05 | 1.34 | 0.12 | 0.31 | 0.28 | down |
| C25H52NO7P | LysoPC 17:0(2n isomer)                         | Lipids                | 1.50E+05 | 1.50E+05 | 1.38 | 0.06 | 0.25 | 0.27 | down |
| C27H46O9   | 1- $\alpha$ -Linolenoyl-glycerol-3-O-glucoside | Lipids                | 4.82E+05 | 4.82E+05 | 1.45 | 0.02 | 0.20 | 0.17 | down |
| C26H46NO7P | LysoPC 18:4                                    | Lipids                | 3.03E+05 | 3.03E+05 | 1.22 | 0.16 | 0.34 | 0.32 | down |
| C25H24O12  | 3,5-Dicaffeoylquinic acid                      | Phenolic acids        | 9.47E+06 | 9.47E+06 | 1.29 | 0.02 | 0.18 | 2.54 | up   |
| C25H24O12  | 1,3-O-Dicaffeoylquinic Acid                    | Phenolic acids        | 7.82E+06 | 7.82E+06 | 1.14 | 0.07 | 0.25 | 2.21 | up   |
| C27H48O9   | 1-Linoleoylglycerol-3-O-glucoside              | Lipids                | 1.08E+05 | 1.08E+05 | 1.39 | 0.11 | 0.29 | 0.12 | down |
| C26H48NO7P | LysoPC 18:3                                    | Lipids                | 9.81E+07 | 9.81E+07 | 1.34 | 0.01 | 0.15 | 0.50 | down |
| C26H48NO7P | LysoPC 18:3(2n isomer)                         | Lipids                | 4.35E+07 | 4.35E+07 | 1.38 | 0.00 | 0.15 | 0.42 | down |
| C26H50NO7P | LysoPC 18:2(2n isomer)                         | Lipids                | 7.92E+06 | 7.92E+06 | 1.40 | 0.05 | 0.24 | 0.37 | down |
| C26H32O11  | Matairesinol-4'-O-glucoside                    | Lignans and Coumarins | 4.94E+05 | 4.94E+05 | 1.41 | 0.06 | 0.25 | 0.21 | down |
| C26H52NO7P | LysoPC 18:1                                    | Lipids                | 7.77E+06 | 7.77E+06 | 1.36 | 0.07 | 0.25 | 0.41 | down |
| C26H52NO7P | LysoPC 18:1(2n isomer)                         | Lipids                | 7.14E+06 | 7.14E+06 | 1.38 | 0.05 | 0.24 | 0.42 | down |
| C24H26O13  | Rosmarinic acid-3'-O-glucoside                 | Phenolic acids        | 1.69E+05 | 1.69E+05 | 1.41 | 0.02 | 0.20 | 0.21 | down |
| C24H26O13  | Centaurein                                     | Flavonoids            | 8.19E+04 | 8.19E+04 | 1.19 | 0.06 | 0.25 | 2.03 | up   |
| C28H50NO7P | LysoPC 20:4                                    | Lipids                | 5.99E+04 | 5.99E+04 | 1.43 | 0.36 | 0.52 | 0.00 | down |
| C28H52NO7P | LysoPC 20:3                                    | Lipids                | 1.12E+05 | 1.12E+05 | 1.33 | 0.08 | 0.27 | 0.46 | down |
| C28H54NO7P | LysoPC 20:2(2n isomer)                         | Lipids                | 3.11E+05 | 3.11E+05 | 1.22 | 0.14 | 0.32 | 0.36 | down |
| C28H54NO7P | LysoPC 20:2                                    | Lipids                | 3.13E+05 | 3.13E+05 | 1.35 | 0.10 | 0.29 | 0.30 | down |
| C26H26O14  | Sinapoylsinapoyltartaric acid                  | Phenolic acids        | 1.61E+04 | 1.61E+04 | 1.32 | 0.02 | 0.20 | 0.50 | down |
| C25H24O15  | Tamarixetin-3-O-(6"-malonyl)glucoside*         | Flavonoids            | 1.85E+06 | 1.85E+06 | 1.10 | 0.11 | 0.30 | 2.10 | up   |

|           |                                                      |            |          |          |      |      |      |      |      |
|-----------|------------------------------------------------------|------------|----------|----------|------|------|------|------|------|
| C26H28O16 | Quercetin-3-O-sambubioside                           | Flavonoids | 5.79E+05 | 5.79E+05 | 1.39 | 0.03 | 0.21 | 2.73 | up   |
| C27H32O16 | Okanin-4'-O-gentiobioside                            | Flavonoids | 8.02E+05 | 8.02E+05 | 1.34 | 0.01 | 0.17 | 0.44 | down |
| C27H30O17 | Myricetin-3-O-galactoside-3'-O-rhamnoside*           | Flavonoids | 5.12E+05 | 5.12E+05 | 1.42 | 0.02 | 0.20 | 2.34 | up   |
| C27H30O17 | Myricetin-3-O-rutinoside*                            | Flavonoids | 4.71E+05 | 4.71E+05 | 1.43 | 0.00 | 0.15 | 2.51 | up   |
| C33H56O14 | Gingerglycolipid A                                   | Lipids     | 3.05E+06 | 3.05E+06 | 1.15 | 0.10 | 0.29 | 0.49 | down |
| C33H56O14 | 1- $\alpha$ -Linolenoyl-glycerol-2,3-di-O-glucoside  | Lipids     | 6.52E+05 | 6.52E+05 | 1.26 | 0.07 | 0.26 | 0.44 | down |
| C33H56O14 | 1-Linolenoyl-rac-glycerol-diglucoside                | Lipids     | 2.21E+06 | 2.21E+06 | 1.43 | 0.01 | 0.15 | 0.37 | down |
| C33H58O14 | Gingerglycolipid B                                   | Lipids     | 3.12E+05 | 3.12E+05 | 1.33 | 0.12 | 0.31 | 0.33 | down |
| C33H60O14 | Gingerglycolipid C                                   | Lipids     | 2.83E+04 | 2.83E+04 | 1.30 | 0.18 | 0.36 | 0.21 | down |
| C30H32O20 | Quercetin-3-O-(6"-O-malonyl)glucosyl-5-O-glucoside   | Flavonoids | 3.22E+04 | 3.22E+04 | 1.40 | 0.07 | 0.25 | 6.69 | up   |
| C31H34O20 | Isorhamnetin-3-O-(6"-malonyl)glucoside-7-O-glucoside | Flavonoids | 5.76E+04 | 5.76E+04 | 1.38 | 0.06 | 0.25 | 4.59 | up   |
| C34H42O21 | Isorhamnetin-3-O-sophoroside-7-O-rhamnoside          | Flavonoids | 2.31E+05 | 2.31E+05 | 1.10 | 0.12 | 0.30 | 2.30 | up   |

---
